1 **Title:**

2 **Near-infrared imaging in fission yeast by genetically encoded biosynthesis of phycocyanobilin**

3

4 **Running Title:**

5 **iRFP imaging in fission yeast**

6

7 **Authors:**

8 Keiichiro Sakai,<sup>1,2,3</sup> Yohei Kondo,<sup>1,2,3</sup> Hiroyoshi Fujioka,<sup>4</sup> Mako Kamiya,<sup>5</sup> Kazuhiro Aoki,<sup>1,2,3,\*</sup>, and  
9 Yuhei Goto,<sup>1,2,3,6\*</sup>

10

11 **Affiliations:**

12 <sup>1</sup>Quantitative Biology Research Group, Exploratory Research Center on Life and Living Systems  
13 (ExCELLS), National Institutes of Natural Sciences, 5-1 Higashiyama, Myodaiji-cho, Okazaki, Aichi  
14 444-8787, Japan.

15 <sup>2</sup>Division of Quantitative Biology, National Institute for Basic Biology, National Institutes of Natural  
16 Sciences, 5-1 Higashiyama, Myodaiji-cho, Okazaki, Aichi 444-8787, Japan.

17 <sup>3</sup>Department of Basic Biology, School of Life Science, SOKENDAI (The Graduate University for  
18 Advanced Studies), 5-1 Higashiyama, Myodaiji-cho, Okazaki, Aichi 444-8787, Japan.

19 <sup>4</sup>Graduate School of Pharmaceutical Sciences, The University of Tokyo, 7-3-1 Hongo, Bunkyo-ku,  
20 Tokyo 113-0033, Japan.

21 <sup>5</sup>Graduate School of Medicine, The University of Tokyo, 7-3-1 Hongo, Bunkyo-ku, Tokyo 113-0033,  
22 Japan

23 <sup>6</sup>Lead contact

24 \*Corresponding authors

25 \*Correspondence: k-aoki@nibb.ac.jp and y-goto@nibb.ac.jp

26

27 **KEYWORDS:**

28 fission yeast, iRFP, biliverdin, phycocyanobilin, imaging

29

30

31 **ABSTRACT**

32 Near-infrared fluorescent protein (iRFP) is a bright and stable fluorescent protein with excitation and  
33 emission maxima at 690 nm and 713 nm, respectively. Unlike the other conventional fluorescent  
34 proteins such as GFP, iRFP requires biliverdin (BV) as a chromophore because iRFP originates from  
35 phytochrome. Here, we report that phycocyanobilin (PCB) functions as a brighter chromophore for  
36 iRFP than BV, and biosynthesis of PCB allows live-cell imaging with iRFP in the fission yeast  
37 *Schizosaccharomyces pombe*. We initially found that fission yeast cells did not produce BV, and  
38 therefore did not show any iRFP fluorescence. The brightness of iRFP attached to PCB was higher than  
39 that of iRFP attached to BV *in vitro* and in fission yeast. We introduced SynPCB, a previously reported  
40 PCB biosynthesis system, into fission yeast, resulting in the brightest iRFP fluorescence. To make  
41 iRFP readily available in fission yeast, we developed an endogenous gene tagging system with iRFP  
42 and all-in-one integration plasmids, which contain genes required for the SynPCB system and the  
43 iRFP-fused marker proteins. These tools not only enable the easy use of iRFP in fission yeast and the  
44 multiplexed live-cell imaging in fission yeast with a broader color palette, but also open the door to  
45 new opportunities for near-infrared fluorescence imaging in a wider range of living organisms.

46

47

## 48 INTRODUCTION

49

50 Fluorescent proteins (FPs) have become indispensable to visualize the biological processes in living  
51 cells and tissues (Lambert, 2019). Green fluorescent protein (GFP), the most widely used FP, has been  
52 intensively modified to improve the brightness and the photo-, thermo-, and pH-stabilities, and to  
53 change the excitation and emission spectrum. Use of a variety of fluorescent proteins with different  
54 excitation and emission spectra enables multiplexed fluorescence imaging to monitor multiple  
55 biological events simultaneously at high spatial and temporal resolution.

56 Near-infrared fluorescent proteins have been developed through the engineering of  
57 phytochromes, which are photosensory proteins of plants, bacteria, and fungi (Chernov et al., 2017).  
58 RpBphP2 from photosynthetic bacteria was engineered as an iRFP (later renamed iRFP713) by  
59 truncation and the saturation mutagenesis (Filonov et al., 2011). Since the initial report of iRFP,  
60 tremendous efforts have been devoted to developing near-infrared FPs with higher brightness,  
61 monomer formation, and longer wavelength (Filonov et al., 2011; Fushimi et al., 2019; Kamper et al.,  
62 2018; Matlashov et al., 2020; Oliinyk et al., 2019; Rodriguez et al., 2016; Rogers et al., 2019;  
63 Shcherbakova and Verkhusha, 2013; Shcherbakova et al., 2016; Shcherbakova et al., 2018; Stepanenko  
64 et al., 2016; Yu et al., 2014; Yu et al., 2015). Unlike the canonical fluorescent proteins derived from  
65 jellyfish or coral, phytochromes require a linear tetrapyrrole as a chromophore such as biliverdin IX $\alpha$   
66 (BV), phycocyanobilin (PCB), or phytochromobilin (P $\Phi$ B); the phytochromes autocatalytically form a  
67 covalent bond with the chromophore (Fushimi and Narikawa, 2021). These linear tetrapyrroles are  
68 produced from heme. Heme-oxygenase (HO) catalyzes oxidative cleavage of heme to generate BV  
69 with the help of ferredoxin (Fd), an electron donor, and ferredoxin-NADP<sup>+</sup> reductase (Fnr). In  
70 cyanobacteria, PCB is produced from BV through PcyA, Fd, and Fnr, while in higher plants P $\Phi$ B is  
71 synthesized from BV using HY2, Fd, and Fnr. To exploit phytochromes that are required for PCB or  
72 P $\Phi$ B in other organisms, our group and others have demonstrated reconstitution of BV, PCB, and P $\Phi$ B  
73 synthesis in bacteria, mammalian cells, frog eggs, the budding yeast, *Pichia*, and fission yeast  
74 (Gambetta and Lagarias, 2001; Hochrein et al., 2017; Kyriakakis et al., 2018; Landgraf et al., 2001;  
75 Mukougawa et al., 2006; Müller et al., 2013; Shin et al., 2014; Tooley et al., 2001; Uda et al., 2017).

76 As the fluorescence of iRFP depends on the chromophore formation, the BV concentration is of  
77 critical importance for imaging iRFP (Fig. 1A). Indeed, it has been reported that the addition of  
78 purified BV increases the fluorescence of iRFPs (Piatkevich et al., 2017; Shemetov et al., 2017).  
79 Alternatively, genetic modifications such as the overexpression of heme oxygenase-1 (HO1), which

80 catalyzes heme to generate BV, and the knock out of biliverdin reductase A (BVRA), which degrades  
81 BV to generate bilirubin, improve the brightness of iRFP through the additional accumulation of BV  
82 (Kobachi et al., 2020; Shemetov et al., 2017). On the other hand, because *Caenorhabditis elegans*  
83 produces little or no BV (Ding et al., 2017), it is not possible to image biological processes in this  
84 nematode simply by introducing the iRFP gene. In the case of multicellular organisms that cannot  
85 produce BV including *C.elegans*, the introduction of genes required for BV production is more  
86 effective than the external addition of BV, because of the low tissue penetration property. However, at  
87 present, only the introduction of the HO1 gene has been reported as a genetically encoded method for  
88 inducing the iRFP chromophore, and it has not been improved or optimized yet.

89 Here, we report that PCB acts as a better chromophore for iRFP than BV, and genetically  
90 encoded PCB synthesis outperforms HO1-mediated BV production in terms of iRFP brightness in  
91 fission yeast. We accidentally found that iRFP did not fluoresce in fission yeast because of the lack of  
92 the HO1 gene, and therefore the lack of BV. Both the external BV addition and heterologous HO1  
93 expression rendered iRFP fluorescent in fission yeast. To our surprise, PCB biosynthesis with a  
94 SynPCB system, which we have previously reported (Uda et al., 2017; Uda et al., 2020), and treatment  
95 of the purified PCB yielded brighter iRFP fluorescence than that by either BV biosynthesis or BV  
96 treatment. We confirmed that PCB-bound iRFP showed higher fluorescence quantum yield than BV-  
97 bound iRFP. To facilitate the simple use of iRFP in fission yeast, we developed a plasmid for iRFP  
98 tagging of endogenous proteins at the C-terminus, novel genome integration vectors, and all-in-one  
99 plasmids carrying genes required for both the SynPCB system and iRFP-fused marker proteins.

100

101

102

103

104 **RESULTS**

105  
106 **iRFP does not fluoresce in fission yeast *Schizosaccharomyces pombe***

107 During the process of experiments, we accidentally found that iRFP did not fluoresce at all in fission  
108 yeast. We first tested whether iRFP was applicable to near-infrared imaging in fission yeast. We  
109 established a cell strain stably expressing nuclear localization signal (NLS)-iRFP-NLS under the  
110 constitutive promoter *Padh1*. No iRFP fluorescence was observed at an excitation wavelength of 640  
111 nm (Fig. 1B). Because the iRFP requires BV as a chromophore for emitting fluorescence (Fig. 1A), we  
112 hypothesized that fission yeast could not metabolize BV intracellularly. Upon the addition of external  
113 BV, the nuclear iRFP fluorescence signal was recovered (Fig. 1B). The titration of BV concentration  
114 yielded a dose-dependent increase in iRFP fluorescence up to 125  $\mu$ M (Fig. 1C). We next examined the  
115 kinetics of BV incorporation into fission yeast cells. Treatment with a high dose of BV (500  $\mu$ M)  
116 gradually increased iRFP fluorescence with a plateau in fluorescence at 60-120 min after the treatment  
117 (Fig. 1D). Since BV is produced from heme through HO, we searched for *HO* in the genomes of fission  
118 yeast and representative fungal species. As expected, we could not find any *HO* or *HO*-like gene in  
119 fission yeast (Fig. S1). Interestingly, *HO* and/or *HO*-like genes, which have been found from bacteria  
120 to higher eukaryotes, are frequently and sporadically lost in the representative fungal species (Fig. S1).  
121 Indeed, while iRFP has been widely used in the budding yeast, *Saccharomyces cerevisiae*, which  
122 retains an *HO* gene (Geller et al., 2019; Li et al., 2017; Tojima et al., 2019; Wosika et al., 2016), there  
123 have been no studies using iRFP in the fission yeast, *S.pombe*. Taken together, these facts led us to  
124 conclude that iRFP does not fluoresce in fission yeast due to the lack of BV and *HO*.

125  
126  
127  
128  
129  
130  
131  
132  
133  
134  
135

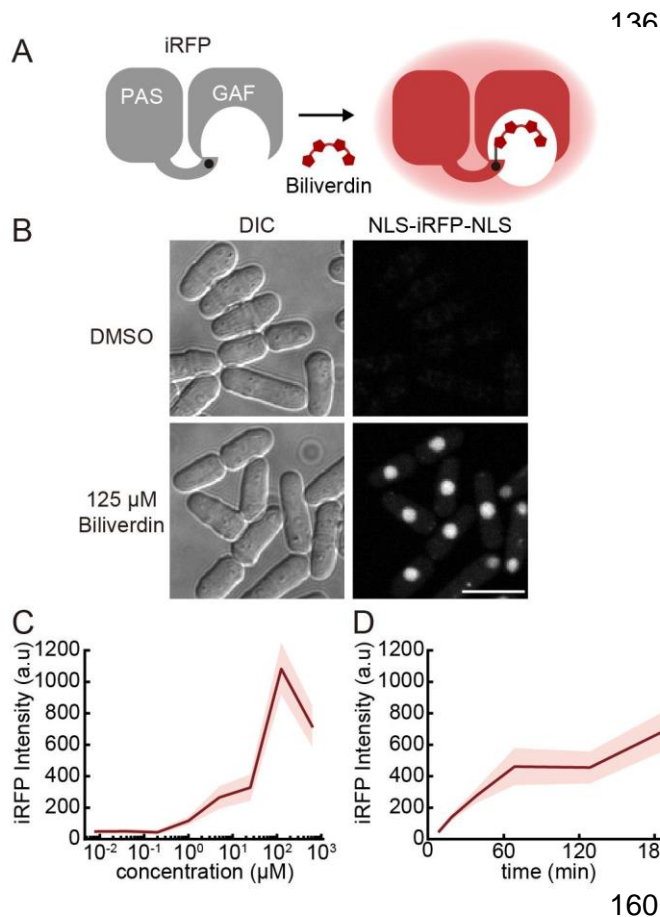

### Fig 1. iRFP does not fluoresce in fission yeast.

(A) Schematic illustration of chromophore formation of iRFP with biliverdin (BV). BV covalently attaches to iRFP as a chromophore. The PAS domain in iRFP contains a conserved cysteine residue at the N-terminus that covalently attaches to the BV, while the BV itself fits into the cleft in the GAF domain. (B) Representative images of fission yeast expressing NLS-iRFP-NLS with or without external BV treatment. Scale bar, 10  $\mu\text{m}$ . (C) Dose-response curve of iRFP fluorescence as a function of levels of BV incorporation in fission yeast cells. Fission yeast cells were cultured in liquid YEA and incubated at room temperature for 3 h with the indicated concentration of BV (8 nM, 40 nM, 200 nM, 1  $\mu\text{M}$ , 5  $\mu\text{M}$ , 25  $\mu\text{M}$ , 125  $\mu\text{M}$ , and 625  $\mu\text{M}$ ). The red line and shaded area indicate the averaged intensity and S.D., respectively (n = 50 cells). (D) Time-course of BV incorporation into fission yeast cells. Fission yeast cells were cultured in liquid YEA and treated with 500  $\mu\text{M}$  BV at the time zero. The red line and shaded area indicate the averaged intensity and S.D., respectively (n = 50 cells).

161  
162

### 163 Development of novel stable knock-in plasmids: pSKI

164 The above results showed that the external supply of BV required high dose and long-term incubation  
165 (60–120 min) to realize iRFP fluorescence in fission yeast, which prompted us to seek an alternative  
166 route to iRFP fluorescence by introducing genes for the biosynthesis of BV. Before starting to develop  
167 the reconstitution system, we developed novel stable integration vectors that met our specific  
168 requirements—stable one copy integration into the genome, no effect on the auxotrophy of integrated  
169 cells, and distant integration loci for crossing strains—rather than using one of the previously  
170 developed integration systems (Fennessy et al., 2014; Kakui et al., 2015; Keeney and Boeke, 1994;  
171 Matsuyama et al., 2004; Maundrell, 1993; Siam et al., 2004; Vještica et al., 2020). At first, we chose  
172 three gene-free loci on each chromosome at chromosome I positions 1,508,522 to 1,508,641 (near  
173 *mug165*, 1L), chromosome II positions 447,732 to 447,827 (near *pho4*, 2L), and chromosome III  
174 positions 1,822,244 to 1,822,343 (near *nup60*, 3R) (Fig. S2A). Next, we designed and developed  
175 plasmids that contain genes required for replication and amplification in *E. coli* (*Amp*, *ori*), the  
176 constitutive promoter *Padh1* or inducible promoter *Pnmt1*, a multiple cloning site (MCS), an *adh1*

177 terminator, a selection marker cassette encoding an antibiotic-resistance gene for fission yeast, and  
178 homology arms connected with the one-cut restriction enzyme recognition site for plasmid linearization  
179 (Fig. S2B). Expected genomic integration with these vectors was confirmed by genomic PCR using  
180 primers designed to span the integration boundary (Fig. S2C). None of these integrations affected the  
181 bulk growth of fission yeast (Fig. S2D), and the protein expression levels from these three loci were  
182 comparable or moderately higher than that from the Z-locus (Fig. S2E). We named this series of  
183 plasmids using the prefix pSKI (p~~l~~asmid for Stably Knock-In, also see Table S1) and used them for the  
184 following experiments.

185

### 186 **PCB brightens iRFP more efficiently than BV in fission yeast**

187 HO is the crucial enzyme in the BV biosynthesis pathway, catalyzing the linearization of tetrapyrrole  
188 (Fig. 2A). Therefore, we established fission yeast cells stably expressing HO1 and NLS-iRFP-NLS  
189 with pSKI, and quantified the resulting iRFP fluorescence. As expected, the expression of HO1 derived  
190 from *Thermosynechococcus elongatus* BP-1 in mitochondria, where heme is abundant, demonstrated  
191 iRFP fluorescence, and the iRFP fluorescence was brighter than that achieved by the external addition  
192 of BV (Fig. 2B, second and third columns). Because HO1 is known to catalyze heme in the presence of  
193 reduced Fd (Rhie and Beale, 1992), we next examined whether co-expression of HO1 and tFnr-Fd, a  
194 chimeric protein of truncated Fnr and Fd (Uda et al., 2020), would improve HO1-mediated iRFP  
195 fluorescence. However, the co-expression of HO1 and tFnr-Fd in mitochondria did not further enhance  
196 iRFP fluorescence as compared to the expression of only HO1 (Fig. 2B, sixth column), suggesting that  
197 authentic ferredoxin in fission yeast sufficiently supports the catalytic reaction through HO1.

198 Unexpectedly, in a series of experiments, we found a further increment in iRFP fluorescence by  
199 PCB (Fig. 2B, ninth column). When PcyA, the enzyme responsible for the production of PCB from  
200 BV, was co-expressed with HO1 and tFnr-Fd, the level of iRFP fluorescence was higher than other  
201 conditions (Fig. 2B, ninth column). To validate these results, we treated the cells expressing NLS-  
202 iRFP-NLS with purified PCB instead of BV. The addition of external PCB substantially outperformed  
203 the addition of BV with respect to iRFP fluorescence intensity (Fig. 2C and 2D). While the  
204 fluorescence intensities were quite different between PCB-bound iRFP (iRFP-PCB) and BV-bound  
205 iRFP (iRFP-BV), the effective concentration of the dose-response curve (Fig. 1C and 2C) and the  
206 kinetics of chromophore incorporation (Fig. 1D and 2D) were comparable between them.

207

208

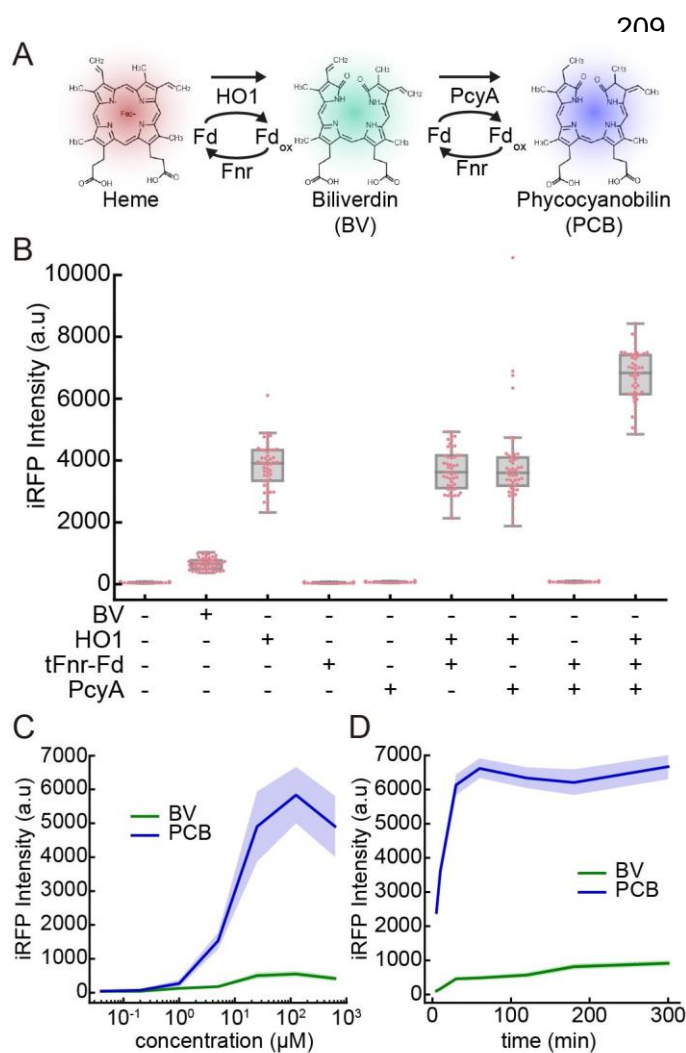

**Fig 2. PCB brightens iRFP more efficiently than BV in fission yeast.**

(A) Schematic illustration of the PCB biosynthesis pathway. (B) Quantification of iRFP fluorescence in fission yeast cells expressing HO1, tFnr-Fd, and PcyA. Under the BV condition, cells were treated with 125  $\mu$ M BV for 1 h at room temperature. Each dot represents iRFP fluorescence from a single cell with a boxplot, in which the box shows the quartiles of data with the whiskers denoting the minimum and maximum except for the outliers detected by 1.5 times the interquartile range ( $n = 50$  cells). (C) Dose-response curve of iRFP fluorescence as a function of the levels of BV or PCB incorporation in fission yeast cells. Fission yeast cells were cultured in liquid YEA and incubated at room temperature for 3 h with the indicated concentration of BV or PCB (8 nM, 40 nM, 200 nM, 1  $\mu$ M, 5  $\mu$ M, 25  $\mu$ M, 125  $\mu$ M, and 625  $\mu$ M). The lines and shaded areas indicate the averaged intensities and S.D., respectively ( $n = 50$  cells). (D) Time-course of iRFP fluorescence in response to BV or PCB treatment. Fission yeast cells were cultured in liquid YEA and treated with 125  $\mu$ M BV or PCB at time zero. The lines and shaded areas indicate the averaged intensities and S.D., respectively ( $n = 50$  cells).

238

239  
240 **PCB yields brighter fluorescence as an iRFP chromophore than BV**

241 The above data indicated the possibility that PCB might be a more suitable chromophore for iRFP than  
242 BV. To prove this hypothesis, we first examined whether the efficiency of holo-iRFP formation  
243 accounted for the difference in iRFP fluorescence between BV- and PCB-treated cells. PCB was added  
244 to the cells with HO1 expression, which exhibited constant intracellular production of BV. Therefore,  
245 iRFP has already formed a holo-complex with BV before attaching to PCB (Fig. 3A). Given that iRFP-  
246 PCB is brighter than iRFP-BV, we reasoned that HO1 expression attenuated the increase in iRFP  
247 fluorescence when the cells were further treated with purified PCB due to the competition between the  
248 PCB and already existing BV for binding to iRFP. As we expected, the addition of purified PCB hardly  
249 increased iRFP fluorescence in cells that had been expressing HO1, in spite of the dose-dependent



250 increase in iRFP fluorescence by PCB treatment in cells not expressing HO1 (Fig. 3B and 3C). These  
 251 observations reveal that almost all iRFP forms a holo-complex with BV when HO1 is expressed.

252 To understand why iRFP-PCB was brighter than iRFP-BV, we prepared recombinant iRFP  
 253 expressed in *E. coli* and purified apo-iRFP (Filonov et al., 2011) (Fig. S3A). Apo-iRFP was mixed with  
 254 PCB and BV to form holo-iRFP, *i.e.*, iRFP-PCB and iRFP-BV, respectively (Fig. S3B). Binding of  
 255 PCB to iRFP resulted in a change in the absorption spectrum from the free PCB (Fig. 3D). The  
 256 absorbance maximum of iRFP-PCB was 10 nm blue-shifted from that of iRFP-BV (Fig. 3E).  
 257 Fluorescence excitation and emission spectra were also 10 nm blue-shifted in iRFP-PCB compared to  
 258 iRFP-BV (Fig. S3C and S3D). Notably, the fluorescence quantum yield of iRFP-PCB was nearly twice  
 259 as high as that of iRFP-BV (0.094 vs. 0.054), while their molecular extinction coefficient values were  
 260 comparable (Fig. 3F). Based on these results, we concluded that iRFP forms a complex with PCB as a  
 261 holo-form and that iRFP-PCB is brighter than iRFP-BV at the molecular level.

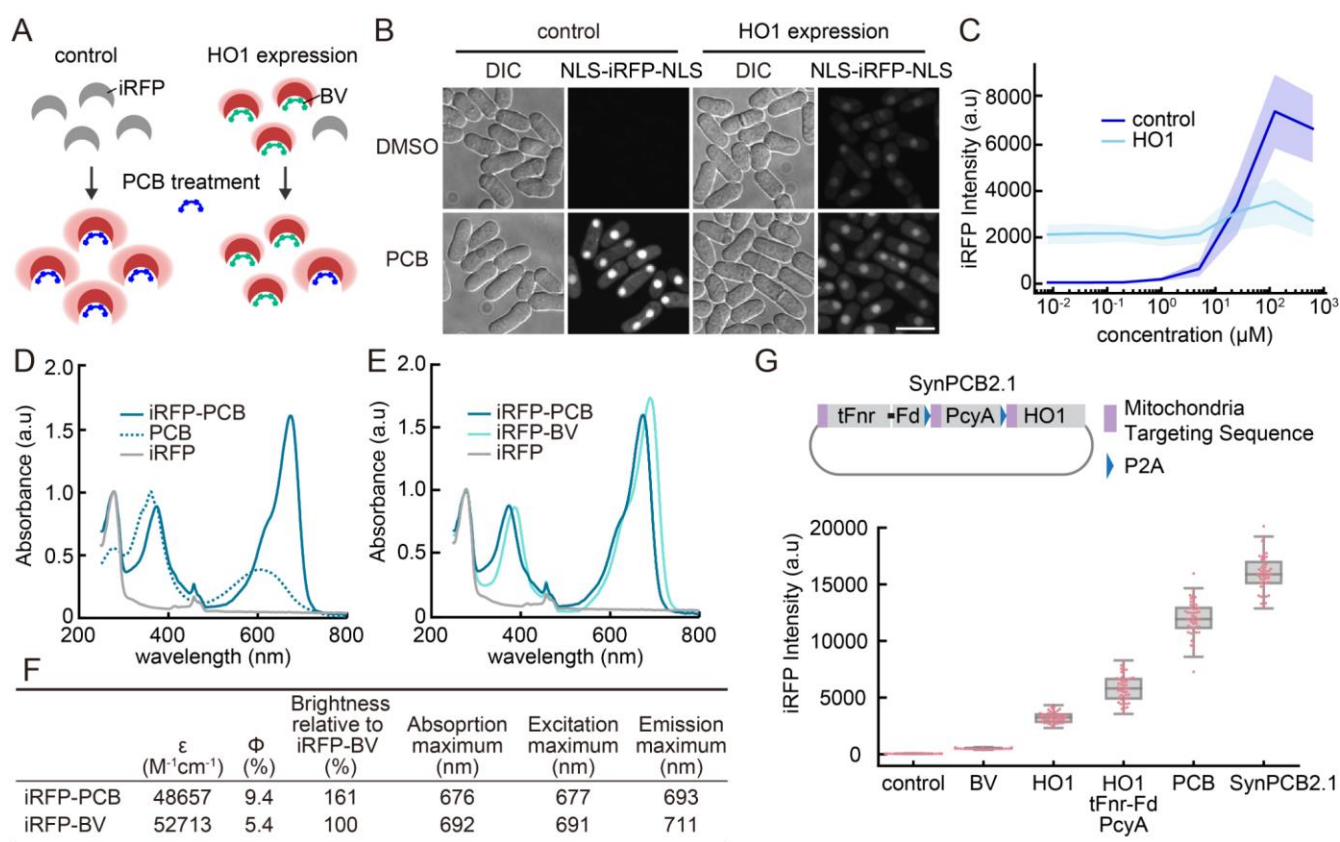

262  
 263

### 264 Fig 3. PCB yields brighter fluorescence as an iRFP chromophore than BV

265 (A) Schematic illustration of the experimental procedure. In control fission yeast cells, iRFP shows  
 266 fluorescence upon the addition of PCB. In HO1 expressing cells, BV binds to iRFP as a chromophore  
 267 before the addition of PCB. Therefore, BV competes with PCB for binding to iRFP. (B) Representative  
 268 images of fission yeast expressing NLS-iRFP-NLS with or without external PCB (125  $\mu$ M) treatment.  
 269 Scale bar, 10  $\mu$ m. (C) Dose-response curve of iRFP fluorescence as a function of the PCB

270 concentration in a culture of fission yeast cells.. Fission yeast cells were cultured in liquid YEA and  
271 incubated at room temperature for 1 h with the indicated concentration of PCB (8 nM, 40 nM, 200 nM,  
272 1  $\mu$ M, 5  $\mu$ M, 25  $\mu$ M, 125  $\mu$ M, and 625  $\mu$ M). The lines and shaded areas indicate the averaged  
273 intensities and S.D., respectively (n = 50 cells). (D) Normalized absorption spectra of PCB-bound iRFP  
274 (iRFP-PCB), free PCB, or iRFP. First, the spectra of iRFP-PCB and iRFP were normalized based on  
275 the absorbance at 280 nm (absorbance of protein), followed by normalization of the PCB spectrum by  
276 the absorbance at 375 nm. (E) Normalized absorption spectra of iRFP-PCB, BV-bound iRFP (iRFP-  
277 BV), and iRFP. The absorption spectra were normalized by the absorbance at 280 nm of each  
278 spectrum. (F) Summary of the fluorescence properties of iRFP-PCB and iRFP-BV *in vitro*.  $\Phi$  and  $\epsilon$   
279 represent the fluorescence quantum yield and molar extinction coefficient, respectively. (G) (upper)  
280 Structure of the SynPCB2.1 plasmid expressing tFnr-Fd, PcyA, and HO1. These proteins are tagged  
281 with the mitochondria targeting sequence (MTS) at their N-termini and flanked by P2A, a self-cleaving  
282 peptide. (lower) Quantification of iRFP fluorescence under the indicated conditions. Cells were treated  
283 with 125  $\mu$ M BV or PCB for 1 h at room temperature (second and fifth columns). Each dot represents  
284 iRFP fluorescence of a single-cell with a boxplot, in which the box shows the quartiles of data with the  
285 whiskers denoting the minimum and maximum except for the outliers detected by 1.5 times the  
286 interquartile range (n = 50 cells).

287

## 288 **SynPCB2.1 is ideal for iRFP imaging in fission yeast**

289 For easy iRFP imaging using PCB as a chromophore, we introduced a system for efficient PCB  
290 biosynthesis, SynPCB2.1, in which the *tFnr-Fd*, *PcyA*, and *HO1* genes are tandemly fused with the  
291 cDNAs of the mitochondrial targeting sequences (MTS) at their N-termini, and flanked by self-  
292 cleaving P2A peptide cDNAs for multicistronic gene expression (Uda et al., 2020) (Fig. 3H). The  
293 single-cassette of SynPCB2.1 genes was knocked-in into cells expressing NLS-iRFP-NLS with a pSKI  
294 vector system, and expressed under the *adh1* promoter. The cells expressing SynPCB2.1 showed higher  
295 iRFP fluorescence than either cells treated with PCB or cells expressing the three genes individually  
296 (Fig. 3H). To determine whether and to what extent iRFP formed a complex with PCB or BV in the  
297 cells, we measured the emission spectrum of iRFP in a living cell. As for the emission spectrum *in*  
298 *vitro*, the cells showed a distinct emission spectrum between iRFP-PCB and iRFP-BV, namely, a blue-  
299 shifted emission spectrum of iRFP-PCB (Fig. S4A). A similar shift was observed when the emission  
300 spectrum of cells expressing SynPCB2.1 was compared to that of cells expressing HO1 (Fig. S4B and  
301 summarized in Fig. S4E). Importantly, cells separately expressing HO1, tFnr-Fd, and PcyA exhibited  
302 an intermediate emission spectrum, suggesting a mixture of iRFP-BV and iRFP-PCB in this cell line.  
303 The presence of iRFP-BV would explain why iRFP fluorescence by SynPCB2.1 was brighter than that  
304 generated by separate expression of the three enzymes in fission yeast (Fig. 3G). Moreover, the  
305 emission spectra obtained from living fission yeast cells demonstrated that iRFP-PCB was much  
306 brighter than iRFP-BV (Fig. S4C and S4D). From these data, we concluded that PCB biosynthesis by  
307 SynPCB2.1 is ideal for iRFP imaging in fission yeast.

308           During iRFP imaging experiments, we found that PCB synthesized in fission yeast cells  
309           expressing SynPCB2.1 is leaked out of the cells and incorporated into the surrounding cells. To clearly  
310           show the PCB leakage, we co-cultured cells expressing only SynPCB2.1 and cells expressing only  
311           NLS-iRFP-NLS. While neither strains exhibited any fluorescence when cultured singly, NLS-iRFP-  
312           NLS emanated fluorescence when cells were co-cultured with the cells expressing SynPCB2.1 (Fig.  
313           S5B and S5C). The data indicate that in fission yeast PCB is leaked into the extracellular space.

314

315           **iRFP imaging in fission yeast: Development of endogenous tagging and all-in-one integration**  
316           **systems.**

317           To further exploit the advantages of iRFP imaging in fission yeast, we first established C-terminal  
318           tagging plasmids based on a commonly used PCR-based tagging system (Longtine et al., 1998). The  
319           plasmids included an *iRFP* cassette followed by one of four different selection markers (Fig. 4A). By  
320           using these plasmids, we verified endogenous *iRFP* tagging to several genes including *cdc2* (CDK,  
321           nucleus), *rpb9* (PolIII, chromatin), *rpa49* (PolII, nucleolus), *swi6* (heterochromatin), *pds5* (cohesin),  
322           *cut11* (nuclear envelope), *mal3* (microtubule plus-end), *sfi1* (spindle pole body, SPB), *cox4*  
323           (mitochondria), and *cnx1* (endoplasmic reticulum, ER) with the expression of SynPCB2.1. All tested  
324           proteins showed the expected subcellular localization in fission yeast (Fig. 4B), although the signal-to-  
325           noise ratios were dependent on the expression level of the endogenous tagged proteins.

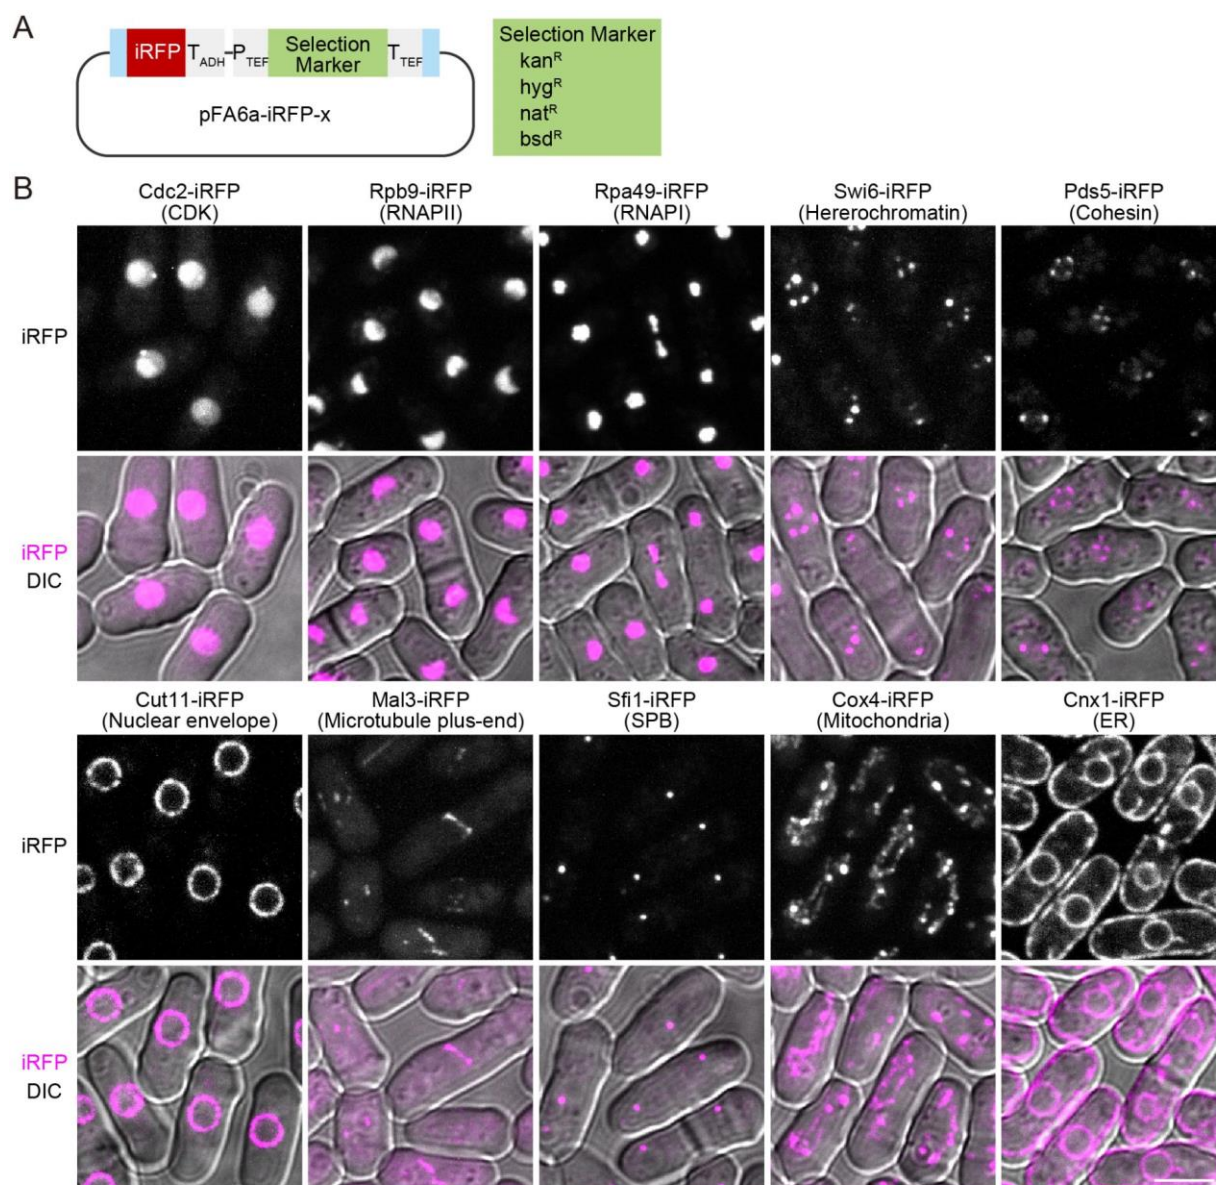

326

327 **Fig 4. Visualization of endogenous proteins by iRFP in fission yeast**

328 (A) Schematic illustration of the plasmid for iRFP tagging of endogenous proteins at the C-terminus.  
 329 Cyan boxes indicate the common overlapping sequences (Longtine et al., 1998). The plasmid list is  
 330 shown in Table S1. (B) The subcellular localization of endogenous proteins tagged with iRFP using  
 331 pFA6a-iRFP. iRFP signals are shown in grayscale in the upper panels, and DIC images are merged with  
 332 magenta iRFP signals and shown in the lower panels. Maximal projection images for iRFP are shown  
 333 except for Cut11-iRFP and Cnx1-iRFP. Scale bar, 5  $\mu$ m.

334

335

336

337

338

Second, we developed all-in-one plasmids carrying SynPCB2.1 and iRFP fusion protein genes to avoid a situation in which these two genes occupy two of the limited selection markers and integration loci. As a proof-of-concept, we introduced cDNA of Lifeact-iRFP (F-actin marker) or NLS-iRFP-NLS (nucleus marker) into the pSKI plasmid with the SynPCB2.1 gene cassette (Fig. 5A and

339 5B). Fission yeast transformed with these plasmids displayed the bright F-actin pattern including actin  
340 patches, actin cables, and contractile ring (Fig. 5A) and nucleus (Fig. 5B). Taking full advantage of  
341 iRFP imaging with the SynPCB system in fission yeast, we established cells expressing four different  
342 proteins: The nucleus, plasma membrane, kinetochore, tubulin, and F-actin were labeled with NLS-  
343 mTagBFP2, Turquoise2-GL-ras1 $\Delta$ N200, endogenous Mis12-mNeonGreen, mCherry-Atb2, and  
344 Lifact-iRFP, respectively (Fig. 5C).

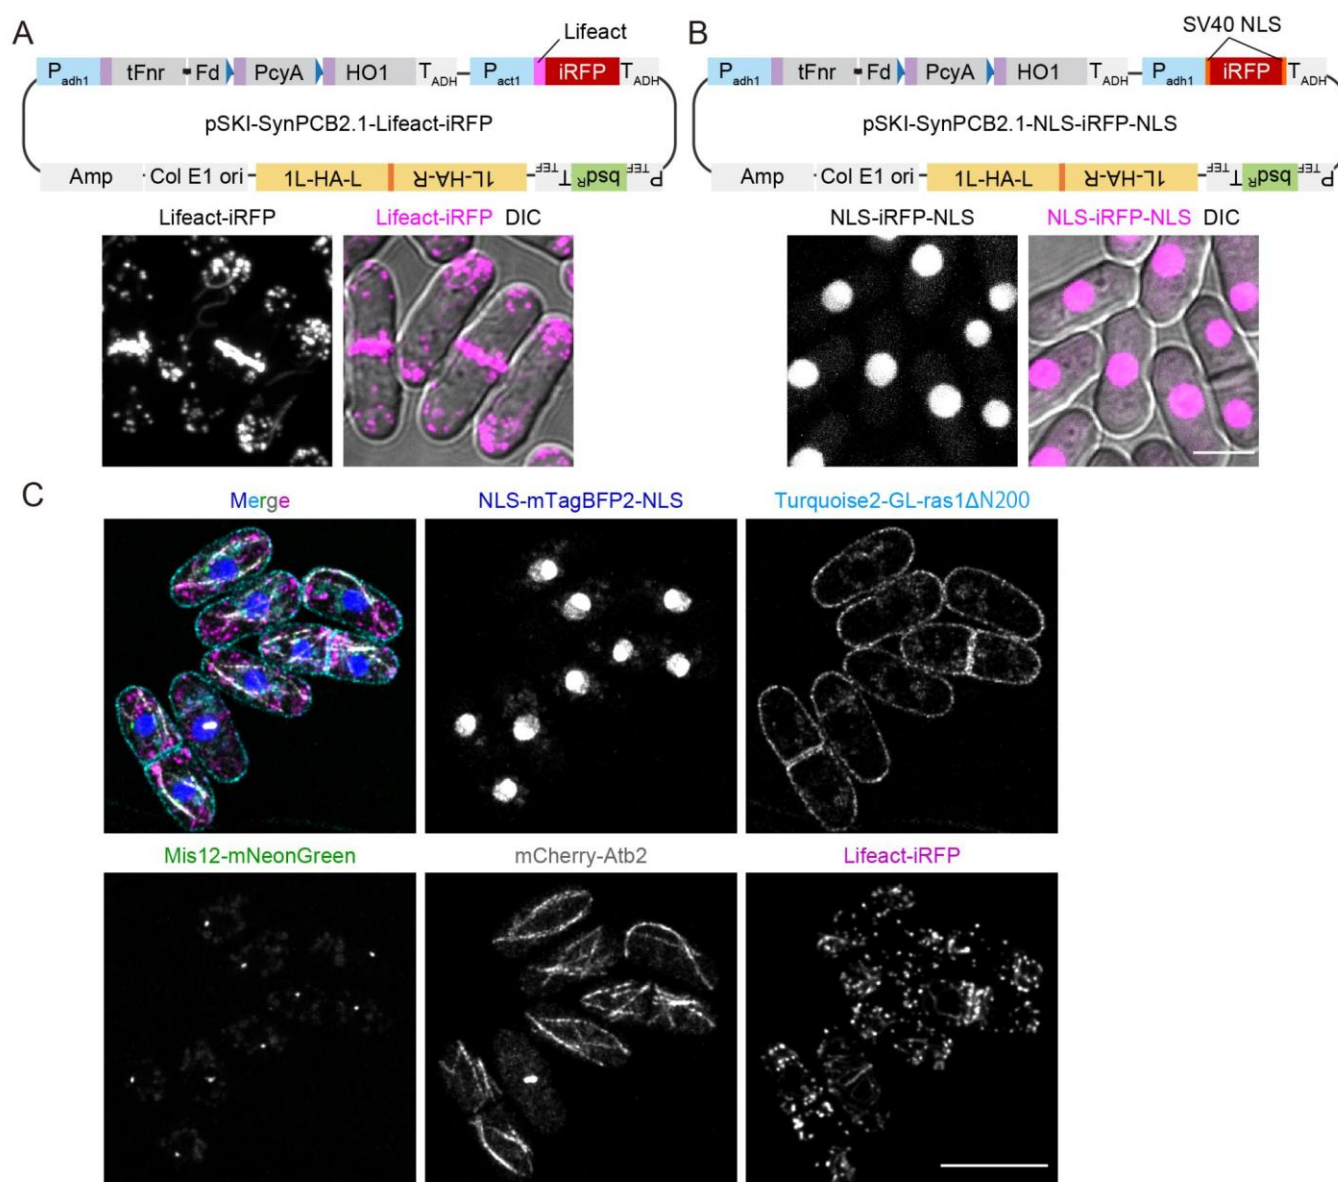

345  
346  
347  
348  
349  
350  
351

### Fig 5. All-in-one plasmids for iRFP imaging

(A) (upper) Schematic illustration of 1L locus integration plasmids for the expression of SynPCB2.1 and Lifact fused with iRFP (pSKI-SynPCB2.1-Lifact-iRFP). (lower) Representative images of fission yeast expressing Lifact-iRFP are shown with the maximal intensity projection image and DIC-merged image. (B) (upper) Schematic illustration of 1L locus integration plasmids for the expression of SynPCB2.1 and NLS-iRFP-NLS (pSKI-SynPCB2.1-NLS-iRFP-NLS). (lower) Representative images

352 of fission yeast expressing NLS-iRFP-NLS are shown with the maximal intensity projection image and  
353 DIC-merged image. Scale bar, 5  $\mu$ m. (C) Multiplexed imaging of fission yeast expressing NLS-  
354 mTagBFP2-NLS (nucleus), Turquoise2-GL-ras1 $\Delta$ N200 (plasma membrane), Mis12-mNeonGreen  
355 (kinetochore), mCherry-Atb2 (tubulin), and Lifeact-iRFP (F-actin). Maximal intensity projection  
356 images (except for Turquoise2-GL-ras1 $\Delta$ N200; single z-section) and a merged image are shown. Scale  
357 bar, 10  $\mu$ m.

358

### 359 **PCB can be used as a chromophore in mammalian cells**

360 Finally, we tested whether PCB could be used as an iRFP chromophore in other organisms. HeLa cells  
361 expressing iRFP along with EGFP, an internal control for iRFP expression, were treated with external  
362 BV or PCB. PCB treatment increased the brightness of iRFP in HeLa cells to the same degree as BV  
363 treatment (Fig. S6A and S6B). BVRA KO HeLa cells displayed higher iRFP fluorescence than did  
364 parental HeLa cells, as reported previously (Kobachi et al., 2020), but did not show any change in iRFP  
365 fluorescence by BV or PCB treatment (Fig. S6B), probably because all iRFP molecules were occupied  
366 by BV. In contrast to fission yeast, the increment of iRFP fluorescence by PCB treatment was  
367 comparable to that by BV treatment in parental HeLa cells (Fig. S6B). Taken together, these results led  
368 us to conclude that PCB is applicable to iRFP imaging in mammalian cells, although it does not offer  
369 significant advantage over BV.

370

## 371 **DISCUSSION**

372 In this study, we demonstrated that iRFP does not fluoresce in fission yeast because of the lack of the  
373 BV-producing enzyme HO. Moreover, we found that PCB acts as a brighter chromophore for iRFP  
374 than BV both *in vitro* and in fission yeast expressing SynPCB2.1. Although PCB is not an authentic  
375 chromophore for iRFP nor the original RpBphP2, our data strongly suggested that PCB forms a  
376 fluorescent chromophore in iRFP. Finally, we developed endogenous iRFP tagging plasmids and all-in-  
377 one plasmids carrying SynPCB2.1 and iRFP marker proteins for the easy use of near-infrared imaging  
378 in fission yeast. As an alternative to external chromophore addition, the SynPCB2.1 system has  
379 potential advantages for iRFP imaging, including being fully genetically encoded and capable of  
380 providing even brighter iRFP fluorescence in fission yeast.

381 Our data indicate that PCB is more suitable as an iRFP chromophore than BV in fission yeast  
382 for several reasons. The first reason is that iRFP-PCB has 2-fold higher fluorescence quantum yield  
383 than iRFP-BV *in vitro*. The second reason is that the excitation and emission spectra of iRFP-PCB are  
384 blue-shifted in comparison to those of iRFP-BV. This result is consistent with previous works  
385 describing the blue-shifted spectra of PCB (Loughlin et al., 2016; Rumyantsev et al., 2015). The blue-  
386 shifted spectra of iRFP-PCB possess favorable properties for most conventional confocal microscopes,  
387 which are equipped with a 630–640 nm excitation laser for near-infrared fluorescence imaging. The  
388 third conceivable reason is the efficient chromophore formation. Indeed, RpBphP1-derived GAF-FP  
389 bound PCB 1.75-fold more efficiently than BV (Rumyantsev et al., 2015). In contrast to fission yeast,  
390 HeLa cells showed no difference in iRFP fluorescence between PCB and BV (Fig. S6). This could be  
391 partly due to the metabolism and culture conditions in mammalian cells, including synthesis of BV by  
392 endogenous HO1, degradation of BV and PCB by BVRA (Kobachi et al., 2020; Terry et al., 1993; Uda  
393 et al., 2017), and the presence of BV and bilirubin in the serum of the culture medium. Based on the  
394 results obtained by using fission yeast, we presume that the existence of BV within a HeLa cell and in  
395 the culture medium attenuates the increase in PCB-induced iRFP fluorescence. Moreover, other  
396 tetrapyrroles, such as primarily PPIX, could compete for iRFP with BV or PCB (Lehtivuori et al.,  
397 2013; Wagner et al., 2008).

398 The SynPCB system allows bright iRFP imaging without adding the external chromophores.  
399 This fact led us to consider that PCB might be applicable to other BV-based fluorescent proteins and  
400 optogenetic tools. Indeed, near-infrared fluorescent proteins that originate from cyanobacteriochrome,  
401 such as smURFP or iRFP670nano (Oliinyk et al., 2019; Rodriguez et al., 2016) exhibit high affinity to  
402 PCB because the original cyanobacteriochromes bind specifically to PCB. miRFPs including

403 miRFP670, miRFP703, and miRFP720 have also been developed from the bacterial phytochrome  
404 RpBphP1 (Shcherbakova et al., 2016; Shemetov et al., 2017), and therefore the SynPCB systems could  
405 be used for imaging with these miRFPs. Bacteriophytochrome-based optogenetic tools using BV  
406 (Kaberniuk et al., 2016; Monakhov et al., 2020; Qian et al., 2020; Redchuk et al., 2017) would be a  
407 potential target for the application of the SynPCB system. We should note that it is not clear whether  
408 PCB, instead of BV, increases the fluorescence brightness of these near-infrared fluorescent proteins  
409 and maintains the photoresponsive properties of these optogenetic tools. Fission yeast is an ideal model  
410 to assess phytochrome-based tools in a cell, such as the difference between BV and PCB as  
411 chromophores and the efficacy of genetically-encoded chromophore reconstruction, because there is  
412 neither a synthetic nor a degradation pathway of BV in fission yeast.

413 We found that the *HO* homologue is frequently lost in fungal species including the fission yeast  
414 during evolution (Fig. S1). In addition to fungi, *Caenorhabditis elegans*, one of the most popular model  
415 organisms, has shown very low, but not zero, BV-producing activity (Ding et al., 2017). Consistent  
416 with this fact, we could not find an *HO* homologue in the worm genome. The SynPCB system paves  
417 the way to utilizing iRFP for a broader range of organisms that lost an *HO* homologue during  
418 evolution. In addition, we recognized that PCB produced by SynPCB2.1 is leaked from the cells and  
419 taken up by surrounding cells, as evidenced by iRFP fluorescence (Fig. S5). It is possible that the same  
420 events take place under actual ecological conditions; some organisms may exploit tetrapyrroles  
421 produced by other organisms in order to render their own phytochromes functional. In fact, *Aspergillus*  
422 *nidulans* and *Neurospora crassa*, both of which lost an *HO* homologue in their genomes (Fig. S1),  
423 harbor phytochrome genes that are required for chromophores (Blumenstein et al., 2005; Froehlich et  
424 al., 2005). The exchanges of tetrapyrroles between living organisms might explain why the *HO* gene is  
425 sporadically lost in many organisms.

426 In this study, we have reported an iRFP imaging platform for fission yeast and a novel  
427 chromosome integration plasmid series, pSKI. The endogenous iRFP tagging system is based on a  
428 commonly used one, allowing anyone to introduce it quickly. The all-in-one plasmids carrying NLS-  
429 iRFP-NLS enable nuclear tracking without occupying green or red color fluorescence channels and  
430 automatic analysis of large-scale time-lapse images with nuclear translocation-type sensors (Regot et  
431 al., 2014). Further characterization and engineering will result in wide use of iRFP and phytochrome-  
432 based optogenetic tools in living organisms.

433



## 434 MATERIALS AND METHODS

435

### 436 Plasmids

437 The cDNAs of *PcyA*, *HOI*, *Fd*, and *Fnr* were originally derived from *Thermosynechococcus elongatus*  
438 BP-1 as previously described (Uda et al., 2020). The mitochondrial targeting sequence (MTS;  
439 MSVLTPLLLRGLTGSARRLP) was derived from human cytochrome C oxidase subunit VIII. The  
440 cDNAs were subcloned into vectors through conventional ligation with Ligation high Ver.2 (Toyobo,  
441 Osaka, Japan) or NEBuilder HiFi DNA Assembly (New England Biolabs, Ipswich, MA) according to  
442 the manufacturers' instruction. The nucleotide sequence of mNeonGreen and Turquoise2-GL were  
443 optimized for fission yeast codon usage (see Benchling link; Table S1). The pSKI vectors include *Amp*,  
444 *colEI ori* (derived from pUC119), selection marker cassettes (derived from pFA6a-3FLAG-bsd,  
445 pFA6a-kan, pAV0587 (pHis5Stul-bleMX), pMNATZA1, and pHBCN1), *Padh1*, *Tadh1* (derived from  
446 pNATZA1), *Pnmt1*, *Tnmt1* (derived from pREP1), and MCSs (synthesized as oligo DNA (Fasmac)).  
447 To construct pSKI-SynPCB2.1-Lifeact-iRFP, *Pact1* (822 bp upstream of the start codon) was cloned  
448 from the fission yeast genome, and the cDNA of Lifeact was introduced by ligating annealed oligo  
449 DNAs. All plasmids used in this study are listed in Table S1 with Benchling links, which include the  
450 sequences and plasmid maps.

451

### 452 Reagents

453 Biliverdin hydrochloride was purchased from Sigma-Aldrich (30891-50MG), dissolved in DMSO (25  
454 mM stock solution and a final concentration ranging from 8 nM to 625  $\mu$ M), and stored at  $-30^{\circ}\text{C}$ . PCB  
455 was purchased from Santa Cruz Biotechnology (sc-396921), dissolved in DMSO (final concentration, 5  
456 mM), and stored at  $-30^{\circ}\text{C}$ .

457

### 458 Fission yeast *Schizosaccharomyces pombe* strain and culture

459 All strains made and used in this study are listed in Table S2. The growth medium, sporulation  
460 medium, and other techniques for fission yeast were based on the protocol described previously  
461 (Moreno et al., 1991) unless otherwise noted. The transformation protocol was modified from that of  
462 Suga and Hatakeyama, 2005. Genome integration by pSKI was confirmed by colony PCR with KOD  
463 One (TOYOBO) and the primers listed in Table S3. For the fluorescence microscope imaging, the  
464 fission yeast cells were concentrated by centrifugation at 3,000 rpm, mounted on a slide glass, and  
465 sealed by a cover glass (Matsunami).

466

## 467 **HeLa cell culture**

468 HeLa cells were the kind gift of Michiyuki Matsuda (Kyoto University) and cultured in Dulbecco's  
469 Modified Eagle's Medium (DMEM) high glucose (Wako; Nacalai Tesque) supplemented with 10%  
470 fetal bovine serum (FBS) (Sigma-Aldrich) at 37°C in 5% CO<sub>2</sub>. For the live-cell imaging, HeLa cells  
471 were plated on CELLview cell culture dishes (glass bottom, 35 mm diameter, 4 components: The  
472 Greiner Bio-One). One day after seeding, transfection was performed with 293fectin transfection  
473 reagent (Thermo Fisher Scientific). Two days after transfection, cells were imaged with fluorescence  
474 microscopes. BV or PCB was added into the DMEM medium containing 10% FBS and cultured for 3 h  
475 at 37°C in 5% CO<sub>2</sub>.

476

## 477 **Measurement of the growth rate of fission yeast**

478 Fission yeast cells were pre-cultured at 30 °C up to the optical density at 600 nm (OD600) of 1.0,  
479 followed by dilution to 1:100. A Compact Rocking Incubator Biophotorecorder TVS062CA (Advantec,  
480 Japan) was used for culture growth (30 °C, 70 rpm) and OD660 measurement. Growth curves were  
481 fitted by the logistic function ( $x = K / (1 + (K/x_0 - 1)e^{-rt})$ ), and doubling time ( $\ln 2 / r$ ) was calculated on  
482 Python 3 and Scipy.

483

## 484 **Protein purification**

485 For the purification of His-tag fused iRFP, pCold-TEV-linker-iRFP was transformed into BL21(DE3)  
486 pLysS. *E. coli* (Promega, L1195) and selected on LB plates containing 0.1 mg/ml ampicillin at 37°C  
487 overnight. A single colony was picked up and inoculated into 2.5 mL liquid LB medium supplemented  
488 with 0.1 mg/ml ampicillin and 30 µg/ml chloramphenicol at 37°C overnight. The preculture was further  
489 inoculated into 250 mL liquid LB medium (1:100) containing ampicillin and chloramphenicol. The  
490 culture was shaken at 37°C for 2–4 h until the OD600 reached 0.6–1.0. The culture was then cooled to  
491 18°C and 0.25 mM Isopropyl β-D-1-thiogalactopyranoside (IPTG) (Wako, 094-05144) was added to  
492 induce the expression of His fused protein. After overnight incubation at 18°C, cells were collected and  
493 suspended into phosphate-buffered saline (PBS) (Takara, T900) containing 20 mM imidazole (Nacalai  
494 Tesque, 19004-22). Suspended cells were lysed sonication (VP-300N; TAITEC), followed by  
495 centrifugation to collect the supernatant. The supernatant was mixed with 250 µL Ni-NTA sepharose  
496 (Qiagen, 1018244), and incubated at 4°C for 2 h. Protein-bound beads were washed with PBS  
497 containing 20 mM imidazole, and proteins were eluted by the addition of 300 mM imidazole in PBS.

498 Eluted fractions were checked by SDS-PAGE with a protein molecular weight marker, Precision Plus  
499 Protein<sup>TM</sup> All Blue Standards (Bio-Rad, #1610373), followed by CBB staining (BIOCRAFT, CBB-  
500 250) and detection by an Odyssey CLx system (Licor). Protein-containing fractions were dialyzed  
501 using a Slide-A-Lyzer Dialysis Cassette 3,500 MWCO (Thermo Scientific, 66110) to remove the  
502 imidazole. To concentrate the recombinant protein, Amicon ultra 3K 500  $\mu$ L (Millipore, UFC500308)  
503 was used. To measure the protein concentration, Pierce<sup>TM</sup> BCA Protein Assay Kit (Thermo Scientific,  
504 23227) was used. Purified His-iRFP was mixed with an excess amount of BV or PCB (1:5 molar ratio),  
505 followed by size exclusion chromatography with NAP-5 Columns (Cytiva, 17085301) to remove free  
506 BV or PCB.

507

### 508 **Characterization of *in vitro* fluorescence properties**

509 The absorption of BV (100  $\mu$ M), PCB (100  $\mu$ M), and His-iRFP (12  $\mu$ M) bound to chromophore was  
510 measured by a P330 nanophotometer (IMPLEN) with a 10 mm quartz glass cuvette (TOSOH, T-29M  
511 UV10). The absorption spectrum was measured in a wavelength range of 200 nm to 950 nm. For the  
512 measurements of absolute fluorescence quantum yield, BV or PCB bound His-iRFP (1  $\mu$ M) in PBS was  
513 subjected to analysis with a Quantaaurus-QY C11347-01 system (Hamamatsu Photonics). The excitation  
514 wavelength was 640 nm. For the measurements of excitation and emission spectra, BV- or PCB- bound  
515 His-iRFP (12  $\mu$ M) was subjected to analysis with an F-4500 fluorescence spectrophotometer (Hitachi).  
516 The protein solution was excited in a wavelength range of 500 nm to 720 nm, and fluorescence at 730  
517 nm was detected to measure the excitation spectrum. To measure the emission spectrum, the protein  
518 solution was excited at 640 nm, and fluorescence was detected in a wavelength range of 660 nm to 800  
519 nm.

520

### 521 **Measurement of *in vivo* emission spectrum**

522 The lambda-scan function of the Leica SP8 Falcon confocal microscope system was used for  
523 measurement of the fluorescence emission spectrum. The excitation wavelength was fixed at 633 nm,  
524 and the 20 nm emission window was slid in 3 nm increments from 650 nm to 768 nm. Each emission  
525 spectrum was normalized by the peak emission value.

526

### 527 **Live-cell fluorescence imaging**

528 Cells were imaged with an IX83 inverted microscope (Olympus) equipped with an sCMOS camera (ORCA-  
529 Fusion BT; Hamamatsu Photonics), an oil objective lens (UPLXAPO 100X, NA = 1.45, WD = 0.13 mm or

530 UPLXAPO 60X, NA = 1.42, WD = 0.15 mm; Olympus), and a spinning disk confocal unit (CSU-W1;  
531 Yokogawa Electric Corporation). The excitation laser and fluorescence filter settings were as follows: excitation  
532 laser, 488 nm and 640 nm for mNeonGreen (or EGFP) and iRFP, respectively; excitation dichroic mirror,  
533 DM405/488/561/640; emission filters, 525/50 for mNeonGreen or EGFP, and 685/40 for iRFP (Yokogawa  
534 Electric). For the five color multiplexed imaging, cells were imaged with Leica SP8 Falcon (Leica) equipped  
535 with an oil objective lens (HCPL APO CS2 100x/1.40 OIL). The excitation laser and fluorescence detectors  
536 settings were as follows: excitation laser, 405 nm, 470 nm, 488 nm, 560 nm, and 633 nm for mTagBFP2,  
537 Turquoise2-GL, mNeonGreen, mCherry, and iRFP, respectively; detector bandwidth, 420-450 nm, 480-500 nm,  
538 500-550 nm, 580-650 nm, and 680-780 nm for mTagBFP2, Turquoise2-GL, mNeonGreen, mCherry, and iRFP,  
539 respectively. Images were obtained with 10 Z-slices of 0.5  $\mu\text{m}$  intervals. Images were subjected to deconvolution  
540 by Lightning (Leica).

541

#### 542 **Imaging analysis**

543 All fluorescence imaging data were analyzed and quantified by Fiji (Image J). The background was  
544 subtracted by the rolling-ball method. Some images were obtained with 10–30 Z-slices of 0.2  $\mu\text{m}$   
545 intervals and shown as 2D images by the maximal intensity projection as noted in each figure legend.  
546 For the quantification of signal intensity, appropriate ROIs were manually selected, and mean  
547 intensities in ROIs were measured.

548

#### 549 **Analysis of *HO*-like sequences in representative species**

550 We searched for *HO*-like sequences in representative fungal species using BLASTp (for details see  
551 Table S4). We adopted human *HOI* (Uniprot P09601) and *S. cerevisiae HMX1* (Uniprot P32339) as the  
552 queries (e-value < 1e-5). The phylogenetic relationship is based on recent studies using multiple genes  
553 (Li et al., 2021; Nguyen et al., 2017). Since the results suggested sequence divergence among *HOI*  
554 homologues, we also used *HO*-like proteins of *Laccaria bicolor* and *Saitoella complicata* obtained  
555 from the BLASTp hits, although no additional sequence was found. Note that the absence in  
556 *Aspergillus nidulans* and the existence in *Candida albicans* are consistent with previous studies  
557 (Blumenstein et al., 2005; Pendrak et al., 2004). Concerning *C. elegans*, we searched for *HO*-like  
558 sequence by the BLASTp interface provided on the WormBase web site (<http://www.wormbase.org>,  
559 release WS280, date 20-Dec-2020, database version WS279). We used the same protein queries, *i.e.*,  
560 human *HOI* and *S. cerevisiae HMX1*, although we obtained no hits (e-value < 1e-2).

561

562 **Acknowledgments**

563 We thank all members of the Aoki Laboratory for their helpful discussions and assistance. The  
564 pCold-TEV plasmid was a kind gift of Dr. Koichi Kato (ExCELLS). Some fission yeast strains were  
565 provided by the National Bio-Resource Project (NBRP), Japan. We thank the Functional Genomics  
566 Facility of the NIBB Core Research Facilities for their technical support with the fluorescence  
567 spectrometry.

568

569 **Competing Interests**

570 The authors declare no competing or financial interest.

571

572 **Author contributions**

573 Conceptualization: Y.G.; Data curation: Y.G., K.S., Y.K.; Formal analysis: Y.G., K.S., Y.K.;  
574 Funding acquisition: Y.K., M.K., Y.G., K.A.; Investigation: Y.G., K.S., Y.K., H.F, M.K.;  
575 Methodology: Y.G., K.S., Y.K., H.F, M.K.; Project administration: Y.G., K.A.; Resources: Y.G., K.S.,  
576 H.F, M.K.; Supervision: K.A., Y.G.; Visualization: Y.G., K.S., Y.K.; Validation: Y.G., K.S., Y.K.;  
577 Writing - original draft: Y.G., K.S., Y.K., K.A.; Writing - review & editing: Y.G., K.S., Y.K., K.A.

578

579 **Funding**

580 K.A. was supported by a CREST, JST Grant (JPMJCR1654), JSPS KAKENHI Grants (nos.  
581 18H02444 and 19H05798), and the ONO Medical Research Foundation. Y.G. was supported by a JSPS  
582 KAKENHI Grant (no.19K16050), a Jigami Yoshifumi Memorial Research Grant, and a Sumitomo  
583 Research grant. Y.K. was supported by JSPS KAKENHI Grants (nos. 19K16207 and 19H05675).

584

585 **References**

- 586 **Blumenstein, A., Vienken, K., Tasler, R., Purschwitz, J., Veith, D., Frankenberg-Dinkel, N. and**  
587 **Fischer, R.** (2005). The *Aspergillus nidulans* phytochrome FphA represses sexual development in  
588 red light. *Curr. Biol.* **15**, 1833–1838.
- 589 **Chernov, K. G., Redchuk, T. A., Omelina, E. S. and Verkhusha, V. V.** (2017). Near-Infrared  
590 Fluorescent Proteins, Biosensors, and Optogenetic Tools Engineered from Phytochromes. *Chem.*  
591 *Rev.* **117**, 6423–6446.
- 592 **Ding, W.-L., Miao, D., Hou, Y.-N., Jiang, S.-P., Zhao, B.-Q., Zhou, M., Scheer, H. and Zhao, K.-**  
593 **H.** (2017). Small monomeric and highly stable near-infrared fluorescent markers derived from the  
594 thermophilic phycobiliprotein, ApcF2. *Biochim. Biophys. Acta Mol. Cell Res.* **1864**, 1877–1886.
- 595 **Fennessy, D., Grallert, A., Krapp, A., Cokoja, A., Bridge, A. J., Petersen, J., Patel, A., Tallada, V.**  
596 **A., Boke, E., Hodgson, B., et al.** (2014). Extending the *Schizosaccharomyces pombe* molecular  
597 genetic toolbox. *PLoS One* **9**, e97683.
- 598 **Filonov, G. S., Piatkevich, K. D., Ting, L.-M., Zhang, J., Kim, K. and Verkhusha, V. V.** (2011).  
599 Bright and stable near-infrared fluorescent protein for in vivo imaging. *Nat. Biotechnol.* **29**, 757–  
600 761.
- 601 **Froehlich, A. C., Noh, B., Vierstra, R. D., Loros, J. and Dunlap, J. C.** (2005). Genetic and  
602 molecular analysis of phytochromes from the filamentous fungus *Neurospora crassa*. *Eukaryot.*  
603 *Cell* **4**, 2140–2152.
- 604 **Fushimi, K. and Narikawa, R.** (2021). Phytochromes and Cyanobacteriochromes: Photoreceptor  
605 Molecules Incorporating a Linear Tetrapyrrole Chromophore. In *Optogenetics: Light-Sensing*  
606 *Proteins and Their Applications in Neuroscience and Beyond* (ed. Yawo, H.), Kandori, H.),  
607 Koizumi, A.), and Kageyama, R.), pp. 167–187. Singapore: Springer Singapore.
- 608 **Fushimi, K., Miyazaki, T., Kuwasaki, Y., Nakajima, T., Yamamoto, T., Suzuki, K., Ueda, Y.,**  
609 **Miyake, K., Takeda, Y., Choi, J.-H., et al.** (2019). Rational conversion of chromophore  
610 selectivity of cyanobacteriochromes to accept mammalian intrinsic biliverdin. *Proc. Natl. Acad.*  
611 *Sci. U. S. A.* **116**, 8301–8309.
- 612 **Gambetta, G. A. and Lagarias, J. C.** (2001). Genetic engineering of phytochrome biosynthesis in  
613 bacteria. *Proc. Natl. Acad. Sci. U. S. A.* **98**, 10566–10571.
- 614 **Geller, S. H., Antwi, E. B., Di Ventura, B. and McClean, M. N.** (2019). Optogenetic Repressors of  
615 Gene Expression in Yeasts Using Light-Controlled Nuclear Localization. *Cell. Mol. Bioeng.* **12**,  
616 511–528.
- 617 **Hochrein, L., Machens, F., Messerschmidt, K. and Mueller-Roeber, B.** (2017). PhiReX: a  
618 programmable and red light-regulated protein expression switch for yeast. *Nucleic Acids Res.* **45**,  
619 9193–9205.
- 620 **Kaberniuk, A. A., Shemetov, A. A. and Verkhusha, V. V.** (2016). A bacterial phytochrome-based  
621 optogenetic system controllable with near-infrared light. *Nat. Methods* **13**, 591–597.

- 622 **Kakui, Y., Sunaga, T., Arai, K., Dodgson, J., Ji, L., Csikász-Nagy, A., Carazo-Salas, R. and Sato,**  
623 **M.** (2015). Module-based construction of plasmids for chromosomal integration of the fission  
624 yeast *Schizosaccharomyces pombe*. *Open Biol.* **5**, 150054.
- 625 **Kamper, M., Ta, H., Jensen, N. A., Hell, S. W. and Jakobs, S.** (2018). Near-infrared STED  
626 nanoscopy with an engineered bacterial phytochrome. *Nat. Commun.* **9**, 4762.
- 627 **Keeney, J. B. and Boeke, J. D.** (1994). Efficient targeted integration at *leu1-32* and *ura4-294* in  
628 *Schizosaccharomyces pombe*. *Genetics* **136**, 849–856.
- 629 **Kobachi, K., Kuno, S., Sato, S., Sumiyama, K., Matsuda, M. and Terai, K.** (2020). Biliverdin  
630 Reductase-A Deficiency Brighten and Sensitize Biliverdin-binding Chromoproteins. *Cell Struct.*  
631 *Funct.* **45**, 131–141.
- 632 **Kyriakakis, P., Catanho, M., Hoffner, N., Thavarajah, W., Hu, V. J., Chao, S.-S., Hsu, A., Pham,**  
633 **V., Naghavian, L., Dozier, L. E., et al.** (2018). Biosynthesis of Orthogonal Molecules Using  
634 Ferredoxin and Ferredoxin-NADP<sup>+</sup> Reductase Systems Enables Genetically Encoded PhyB  
635 Optogenetics. *ACS Synth. Biol.* **7**, 706–717.
- 636 **Lambert, T. J.** (2019). FPbase: a community-editable fluorescent protein database. *Nat. Methods* **16**,  
637 277–278.
- 638 **Landgraf, F. T., Forreiter, C., Hurtado Picó, A., Lamparter, T. and Hughes, J.** (2001).  
639 Recombinant holophytochrome in *Escherichia coli*. *FEBS Lett.* **508**, 459–462.
- 640 **Lehtivuori, H., Rissanen, I., Takala, H., Bamford, J., Tkachenko, N. V. and Ihalainen, J. A.**  
641 (2013). Fluorescence properties of the chromophore-binding domain of bacteriophytochrome from  
642 *Deinococcus radiodurans*. *J. Phys. Chem. B* **117**, 11049–11057.
- 643 **Li, Y., Jin, M., O’Laughlin, R., Bittihn, P., Tsimring, L. S., Pillus, L., Hasty, J. and Hao, N.**  
644 (2017). Multigenerational silencing dynamics control cell aging. *Proc. Natl. Acad. Sci. U. S. A.*  
645 **114**, 11253–11258.
- 646 **Li, Y., Steenwyk, J. L., Chang, Y., Wang, Y., James, T. Y., Stajich, J. E., Spatafora, J. W.,**  
647 **Groenewald, M., Dunn, C. W., Hittinger, C. T., et al.** (2021). A genome-scale phylogeny of the  
648 kingdom Fungi. *Curr. Biol.* **31**, 1653–1665.e5.
- 649 **Longtine, M. S., McKenzie, A., 3rd, Demarini, D. J., Shah, N. G., Wach, A., Brachat, A.,**  
650 **Philippsen, P. and Pringle, J. R.** (1998). Additional modules for versatile and economical PCR-  
651 based gene deletion and modification in *Saccharomyces cerevisiae*. *Yeast* **14**, 953–961.
- 652 **Loughlin, P. C., Duxbury, Z., Mugerwa, T. T. M., Smith, P. M. C., Willows, R. D. and Chen, M.**  
653 (2016). Spectral properties of bacteriophytochrome AM1\_5894 in the chlorophyll d-containing  
654 cyanobacterium *Acaryochloris marina*. *Sci. Rep.* **6**, 27547.
- 655 **Matlashov, M. E., Shcherbakova, D. M., Alvelid, J., Baloban, M., Pennacchietti, F., Shemetov, A.**  
656 **A., Testa, I. and Verkhusha, V. V.** (2020). A set of monomeric near-infrared fluorescent proteins  
657 for multicolor imaging across scales. *Nat. Commun.* **11**, 239.

- 658 **Matsuyama, A., Shirai, A., Yashiroda, Y., Kamata, A., Horinouchi, S. and Yoshida, M.** (2004).  
659 pDUAL, a multipurpose, multicopy vector capable of chromosomal integration in fission yeast.  
660 *Yeast* **21**, 1289–1305.
- 661 **Maundrell, K.** (1993). Thiamine-repressible expression vectors pREP and pRIP for fission yeast. *Gene*  
662 **123**, 127–130.
- 663 **Monakhov, M. V., Matlashov, M. E., Colavita, M., Song, C., Shcherbakova, D. M., Antic, S. D.,**  
664 **Verkhusha, V. V. and Knöpfel, T.** (2020). Screening and Cellular Characterization of  
665 Genetically Encoded Voltage Indicators Based on Near-Infrared Fluorescent Proteins. *ACS Chem.*  
666 *Neurosci.* **11**, 3523–3531.
- 667 **Moreno, S., Klar, A. and Nurse, P.** (1991). Molecular genetic analysis of fission yeast  
668 *Schizosaccharomyces pombe*. *Methods Enzymol.* **194**, 795–823.
- 669 **Mukougawa, K., Kanamoto, H., Kobayashi, T., Yokota, A. and Kohchi, T.** (2006). Metabolic  
670 engineering to produce phytochromes with phytochromobilin, phycocyanobilin, or  
671 phycoerythrobilin chromophore in *Escherichia coli*. *FEBS Lett.* **580**, 1333–1338.
- 672 **Müller, K., Engesser, R., Timmer, J., Nagy, F., Zurbriggen, M. D. and Weber, W.** (2013).  
673 Synthesis of phycocyanobilin in mammalian cells. *Chem. Commun.* **49**, 8970–8972.
- 674 **Nguyen, T. A., Cissé, O. H., Yun Wong, J., Zheng, P., Hewitt, D., Nowrousian, M., Stajich, J. E.**  
675 **and Jedd, G.** (2017). Innovation and constraint leading to complex multicellularity in the  
676 Ascomycota. *Nat. Commun.* **8**, 14444.
- 677 **Oliinyk, O. S., Shemetov, A. A., Pletnev, S., Shcherbakova, D. M. and Verkhusha, V. V.** (2019).  
678 Smallest near-infrared fluorescent protein evolved from cyanobacteriochrome as versatile tag for  
679 spectral multiplexing. *Nat. Commun.* **10**, 279.
- 680 **Pendrak, M. L., Chao, M. P., Yan, S. S. and Roberts, D. D.** (2004). Heme Oxygenase in *Candida*  
681 *albicans* Is Regulated by Hemoglobin and Is Necessary for Metabolism of Exogenous Heme and  
682 Hemoglobin to  $\alpha$ -Biliverdin\*. *J. Biol. Chem.* **279**, 3426–3433.
- 683 **Piatkevich, K. D., Suk, H.-J., Kodandaramaiah, S. B., Yoshida, F., DeGennaro, E. M., Drobizhev,**  
684 **M., Hughes, T. E., Desimone, R., Boyden, E. S. and Verkhusha, V. V.** (2017). Near-Infrared  
685 Fluorescent Proteins Engineered from Bacterial Phytochromes in Neuroimaging. *Biophys. J.* **113**,  
686 2299–2309.
- 687 **Qian, Y., Cosio, D. M. O., Piatkevich, K. D., Aufmkolk, S., Su, W.-C., Celiker, O. T., Schohl, A.,**  
688 **Murdock, M. H., Aggarwal, A., Chang, Y.-F., et al.** (2020). Improved genetically encoded near-  
689 infrared fluorescent calcium ion indicators for in vivo imaging. *PLoS Biol.* **18**, e3000965.
- 690 **Redchuk, T. A., Omelina, E. S., Chernov, K. G. and Verkhusha, V. V.** (2017). Near-infrared  
691 optogenetic pair for protein regulation and spectral multiplexing. *Nat. Chem. Biol.* **13**, 633–639.
- 692 **Regot, S., Hughey, J. J., Bajar, B. T., Carrasco, S. and Covert, M. W.** (2014). High-sensitivity  
693 measurements of multiple kinase activities in live single cells. *Cell* **157**, 1724–1734.



- 694 **Rhie, G. and Beale, S. I.** (1992). Biosynthesis of phycobilins. Ferredoxin-supported nadph-  
695 independent heme oxygenase and phycobilin-forming activities from *Cyanidium caldarium*. *J.*  
696 *Biol. Chem.* **267**, 16088–16093.
- 697 **Rodriguez, E. A., Tran, G. N., Gross, L. A., Crisp, J. L., Shu, X., Lin, J. Y. and Tsien, R. Y.**  
698 (2016). A far-red fluorescent protein evolved from a cyanobacterial phycobiliprotein. *Nat.*  
699 *Methods* **13**, 763–769.
- 700 **Rogers, O. C., Johnson, D. M. and Firnberg, E.** (2019). mRhubarb: Engineering of monomeric, red-  
701 shifted, and brighter variants of iRFP using structure-guided multi-site mutagenesis. *Sci. Rep.* **9**,  
702 15653.
- 703 **Rumyantsev, K. A., Shcherbakova, D. M., Zakharova, N. I., Emelyanov, A. V., Turoverov, K. K.**  
704 **and Verkhusha, V. V.** (2015). Minimal domain of bacterial phytochrome required for  
705 chromophore binding and fluorescence. *Sci. Rep.* **5**, 18348.
- 706 **Shcherbakova, D. M. and Verkhusha, V. V.** (2013). Near-infrared fluorescent proteins for multicolor  
707 in vivo imaging. *Nat. Methods* **10**, 751–754.
- 708 **Shcherbakova, D. M., Baloban, M., Emelyanov, A. V., Brenowitz, M., Guo, P. and Verkhusha, V.**  
709 **V.** (2016). Bright monomeric near-infrared fluorescent proteins as tags and biosensors for  
710 multiscale imaging. *Nat. Commun.* **7**, 12405.
- 711 **Shcherbakova, D. M., Cox Cammer, N., Huisman, T. M., Verkhusha, V. V. and Hodgson, L.**  
712 (2018). Direct multiplex imaging and optogenetics of Rho GTPases enabled by near-infrared  
713 FRET. *Nat. Chem. Biol.* **14**, 591–600.
- 714 **Shemetov, A. A., Oliinyk, O. S. and Verkhusha, V. V.** (2017). How to Increase Brightness of Near-  
715 Infrared Fluorescent Proteins in Mammalian Cells. *Cell Chem Biol* **24**, 758–766.e3.
- 716 **Shin, A.-Y., Han, Y.-J., Song, P.-S. and Kim, J.-I.** (2014). Expression of recombinant full-length  
717 plant phytochromes assembled with phytochromobilin in *Pichia pastoris*. *FEBS Lett.* **588**, 2964–  
718 2970.
- 719 **Siam, R., Dolan, W. P. and Forsburg, S. L.** (2004). Choosing and using *Schizosaccharomyces pombe*  
720 plasmids. *Methods* **33**, 189–198.
- 721 **Stepanenko, O. V., Baloban, M., Bublikov, G. S., Shcherbakova, D. M., Stepanenko, O. V.,**  
722 **Turoverov, K. K., Kuznetsova, I. M. and Verkhusha, V. V.** (2016). Allosteric effects of  
723 chromophore interaction with dimeric near-infrared fluorescent proteins engineered from bacterial  
724 phytochromes. *Sci. Rep.* **6**, 18750.
- 725 **Suga, M. and Hatakeyama, T.** (2005). A rapid and simple procedure for high-efficiency lithium  
726 acetate transformation of cryopreserved *Schizosaccharomyces pombe* cells. 799–804.
- 727 **Terry, M. J., Maines, M. D. and Lagarias, J. C.** (1993). Inactivation of phytochrome- and  
728 phycobiliprotein-chromophore precursors by rat liver biliverdin reductase. *J. Biol. Chem.* **268**,  
729 26099–26106.

- 730 **Tojima, T., Suda, Y., Ishii, M., Kurokawa, K. and Nakano, A.** (2019). Spatiotemporal dissection of  
731 the trans-Golgi network in budding yeast. *J. Cell Sci.* **132**,.
- 732 **Tooley, A. J., Cai, Y. A. and Glazer, A. N.** (2001). Biosynthesis of a fluorescent cyanobacterial C-  
733 phycocyanin holo- $\alpha$  subunit in a heterologous host. *Proc. Natl. Acad. Sci. U. S. A.* **98**, 10560–  
734 10565.
- 735 **Uda, Y., Goto, Y., Oda, S., Kohchi, T., Matsuda, M. and Aoki, K.** (2017). Efficient synthesis of  
736 phycocyanobilin in mammalian cells for optogenetic control of cell signaling. *Proc. Natl. Acad.*  
737 *Sci. U. S. A.* **114**, 11962–11967.
- 738 **Uda, Y., Miura, H., Goto, Y., Yamamoto, K., Mii, Y., Kondo, Y., Takada, S. and Aoki, K.** (2020).  
739 Improvement of Phycocyanobilin Synthesis for Genetically Encoded Phytochrome-Based  
740 Optogenetics. *ACS Chem. Biol.*
- 741 **Vještica, A., Marek, M., Nkosi, P. J., Merlini, L., Liu, G., Bérard, M., Billault-Chaumartin, I. and**  
742 **Martin, S. G.** (2020). A toolbox of stable integration vectors in the fission yeast  
743 *Schizosaccharomyces pombe*. *J. Cell Sci.* **133**,.
- 744 **Wagner, J. R., Zhang, J., von Stetten, D., Günther, M., Murgida, D. H., Mroginski, M. A.,**  
745 **Walker, J. M., Forest, K. T., Hildebrandt, P. and Vierstra, R. D.** (2008). Mutational analysis  
746 of *Deinococcus radiodurans* bacteriophytochrome reveals key amino acids necessary for the  
747 photochromicity and proton exchange cycle of phytochromes. *J. Biol. Chem.* **283**, 12212–12226.
- 748 **Wosika, V., Durandau, E., Varidel, C., Aymoz, D., Schmitt, M. and Pelet, S.** (2016). New families  
749 of single integration vectors and gene tagging plasmids for genetic manipulations in budding  
750 yeast. *Mol. Genet. Genomics* **291**, 2231–2240.
- 751 **Yu, D., Gustafson, W. C., Han, C., Lafaye, C., Noirclerc-Savoie, M., Ge, W.-P., Thayer, D. A.,**  
752 **Huang, H., Kornberg, T. B., Royant, A., et al.** (2014). An improved monomeric infrared  
753 fluorescent protein for neuronal and tumour brain imaging. *Nat. Commun.* **5**, 3626.
- 754 **Yu, D., Baird, M. A., Allen, J. R., Howe, E. S., Klassen, M. P., Reade, A., Makhijani, K., Song, Y.,**  
755 **Liu, S., Murthy, Z., et al.** (2015). A naturally monomeric infrared fluorescent protein for protein  
756 labeling in vivo. *Nat. Methods* **12**, 763–765.
- 757
