1 **Title:**

2 **Near-infrared imaging in fission yeast by genetically encoded biosynthesis of phycocyanobilin**

3

4 **Running Title:**

5 **iRFP imaging in fission yeast**

6

7 **Authors:**

8 Keiichiro Sakai<sup>1,2,3</sup>, Yohei Kondo<sup>1,2,3</sup>, Hiroyoshi Fujioka<sup>4</sup>, Mako Kamiya<sup>5</sup>, Kazuhiro Aoki<sup>1,2,3,\*</sup>, and  
9 Yuhei Goto<sup>1,2,3,6,\*</sup>

10

11 **Affiliations:**

12 <sup>1</sup>Quantitative Biology Research Group, Exploratory Research Center on Life and Living Systems  
13 (ExCELLS), National Institutes of Natural Sciences, 5-1 Higashiyama, Myodaiji-cho, Okazaki, Aichi  
14 444-8787, Japan.

15 <sup>2</sup>Division of Quantitative Biology, National Institute for Basic Biology, National Institutes of Natural  
16 Sciences, 5-1 Higashiyama, Myodaiji-cho, Okazaki, Aichi 444-8787, Japan.

17 <sup>3</sup>Department of Basic Biology, School of Life Science, SOKENDAI (The Graduate University for  
18 Advanced Studies), 5-1 Higashiyama, Myodaiji-cho, Okazaki, Aichi 444-8787, Japan.

19 <sup>4</sup>Graduate School of Pharmaceutical Sciences, The University of Tokyo, 7-3-1 Hongo, Bunkyo-ku,  
20 Tokyo 113-0033, Japan.

21 <sup>5</sup>Graduate School of Medicine, The University of Tokyo, 7-3-1 Hongo, Bunkyo-ku, Tokyo 113-0033,  
22 Japan

23 <sup>6</sup>Lead contact

24 \*Corresponding authors

25 \*Correspondence: k-aoki@nibb.ac.jp and y-goto@nibb.ac.jp

26

27 **KEYWORDS:**

28 fission yeast, iRFP, biliverdin, phycocyanobilin, imaging

29

30

31 **ABSTRACT**

32 Near-infrared fluorescent protein (iRFP) is a bright and stable fluorescent protein with excitation and  
33 emission maxima at 690 nm and 713 nm, respectively. Unlike the other conventional fluorescent  
34 proteins such as GFP, iRFP requires biliverdin (BV) as a chromophore because iRFP originates from  
35 bacteriophytochrome. Here, we report that phycocyanobilin (PCB) functions as a brighter chromophore  
36 for iRFP than BV, and biosynthesis of PCB allows live-cell imaging with iRFP in the fission yeast  
37 *Schizosaccharomyces pombe*. We initially found that fission yeast cells did not produce BV, and  
38 therefore did not show any iRFP fluorescence. The brightness of iRFP attached to PCB was higher than  
39 that of iRFP attached to BV *in vitro* and in fission yeast. We introduced SynPCB, a previously reported  
40 PCB biosynthesis system, into fission yeast, resulting in the brightest iRFP fluorescence. To make  
41 iRFP readily available in fission yeast, we developed an endogenous gene tagging system with iRFP  
42 and all-in-one integration plasmids, which contain genes required for the SynPCB system and the  
43 iRFP-fused marker proteins. These tools not only enable the easy use of iRFP in fission yeast and the  
44 multiplexed live-cell imaging in fission yeast with a broader color palette, but also open the door to  
45 new opportunities for near-infrared fluorescence imaging in a wider range of living organisms.

46

47

## 48 INTRODUCTION

49

50 Fluorescent proteins (FPs) have become indispensable to visualize the biological processes in living  
51 cells and tissues (Lambert 2019). Green fluorescent protein (GFP), the most widely used FP, has been  
52 intensively modified to improve the brightness and the photo-, thermo-, and pH-stabilities, and to  
53 change the excitation and emission spectrum. Use of a variety of fluorescent proteins with different  
54 excitation and emission spectra enables multiplexed fluorescence imaging to monitor multiple  
55 biological events simultaneously at high spatial and temporal resolution.

56 Near-infrared fluorescent proteins have been developed through the engineering of  
57 phytochromes, which are photosensory proteins of plants, bacteria, and fungi (Chernov et al. 2017), or  
58 allophycocyanin, which is a light-harvesting phycobiliprotein of cyanobacteria (Rodriguez et al. 2016).  
59 RpBphP2 from photosynthetic bacteria was engineered as an iRFP (later renamed iRFP713) by  
60 truncation and the saturation mutagenesis (Filonov et al. 2011). Since the initial report of iRFP,  
61 tremendous efforts have been devoted to developing near-infrared FPs with higher brightness,  
62 monomer formation, and longer wavelength (Shcherbakova and Verkhusha 2013; Shcherbakova et al.  
63 2016, 2018; Matlashov et al. 2020; Stepanenko et al. 2016; Oliinyk et al. 2019; Kamper et al. 2018; Yu  
64 et al. 2014; Rodriguez et al. 2016; Yu et al. 2015; Rogers, Johnson, and Firnberg 2019; Filonov et al.  
65 2011; Fushimi et al. 2019). Unlike the canonical fluorescent proteins derived from jellyfish or coral,  
66 phytochromes and allophycocyanin require a linear tetrapyrrole as a chromophore such as biliverdin  
67 IX $\alpha$  (BV), phycocyanobilin (PCB), or phytochromobilin (P $\Phi$ B); bacteriophytochromes bind to BV,  
68 allophycocyanin and cyanobacterial phytochromes bind to PCB, and plantal phytochromes bind to  
69 P $\Phi$ B. These photosensory proteins autocatalytically form a covalent bond with the chromophore  
70 (Fushimi and Narikawa 2021). These linear tetrapyrroles are produced from heme (Terry and Lagarias  
71 1991; Beale 1993). Heme-oxygenase (HO) catalyzes oxidative cleavage of heme to generate BV with  
72 the help of ferredoxin (Fd), an electron donor, and ferredoxin-NADP<sup>+</sup> reductase (Fnr) (Cornejo,  
73 Willows, and Beale 1998). In cyanobacteria, PCB is produced from BV through PcyA, Fd, and Fnr,  
74 while in plants, P $\Phi$ B is synthesized from BV using HY2, Fd, and Fnr (Muramoto et al. 1999;  
75 Frankenberg et al. 2001; Kohchi et al. 2001). To exploit phytochromes that are required for PCB or  
76 P $\Phi$ B in other organisms, our group and others have demonstrated reconstitution of BV, PCB, and P $\Phi$ B  
77 synthesis in bacteria, mammalian cells, frog eggs, the budding yeast, *Pichia*, and fission yeast  
78 (Mukougawa et al. 2006; Gambetta and Lagarias 2001; Tooley, Cai, and Glazer 2001; Landgraf et al.

79 2001; K. Müller et al. 2013; Uda et al. 2017; Kyriakakis et al. 2018; Hochrein et al. 2017; Shin et al.  
80 2014).

81 As the fluorescence of iRFP depends on chromophore formation, the BV concentration is of  
82 critical importance for imaging iRFP (Fig. 1A). Indeed, it has been reported that the addition of  
83 purified BV increases the fluorescence of iRFPs (Shemetov, Oliinyk, and Verkhusha 2017; Piatkevich  
84 et al. 2017). Alternatively, genetic modifications such as the overexpression of heme oxygenase-1  
85 (HO1), which catalyzes heme to generate BV, and the knock out of biliverdin reductase A (BVRA),  
86 which degrades BV to generate bilirubin, improve the brightness of iRFP through the additional  
87 accumulation of BV (Shemetov, Oliinyk, and Verkhusha 2017; Kobachi et al. 2020). On the other  
88 hand, because *Caenorhabditis elegans* produces little or no BV (Ding et al. 2017), it is not possible to  
89 image biological processes in this nematode simply by introducing the iRFP gene. In the case of  
90 multicellular organisms that cannot produce BV, including *C.elegans*, the introduction of genes  
91 required for BV production is more effective than the external addition of BV because of the low tissue  
92 penetration property. However, at present, only the introduction of the HO1 gene has been reported as a  
93 genetically encoded method for inducing the iRFP chromophore, and it has not been improved or  
94 optimized yet.

95 Here, we report that PCB acts as a better chromophore for iRFP than BV, and genetically  
96 encoded PCB synthesis outperforms HO1-mediated BV production in terms of iRFP brightness in  
97 fission yeast. We accidentally found that iRFP did not fluoresce in fission yeast because of the lack of  
98 the HO1 gene, and therefore the lack of BV. Both the external BV addition and heterologous HO1  
99 expression rendered iRFP fluorescent in fission yeast. To our surprise, PCB biosynthesis with a  
100 SynPCB system, which we have previously reported (Uda et al. 2017, 2020), and treatment of the  
101 purified PCB yielded brighter iRFP fluorescence than that by either BV biosynthesis or BV treatment.  
102 We confirmed that PCB-bound iRFP showed higher fluorescence quantum yield than BV-bound iRFP.  
103 To facilitate the simple use of iRFP in fission yeast, we developed a plasmid for iRFP tagging of  
104 endogenous proteins at the C-terminus, novel genome integration vectors, and all-in-one plasmids  
105 carrying genes required for both the SynPCB system and iRFP-fused marker proteins.

106

107

108 **RESULTS**

109

110 **iRFP does not fluoresce in fission yeast *Schizosaccharomyces pombe***

111 During the process of experiments, we accidentally found that iRFP did not fluoresce at all in fission  
112 yeast. We first tested whether iRFP was applicable to near-infrared imaging in fission yeast. We  
113 established a cell strain stably expressing nuclear localization signal (NLS)-iRFP-NLS (Miura et al.  
114 2018) under the constitutive promoter *Padh1*. Two NLSs are fused with iRFP because the addition of a  
115 single NLS does not sufficiently localize the protein at the nucleus. No iRFP fluorescence was  
116 observed at an excitation wavelength of 640 nm (Fig. 1B). Because the iRFP requires BV as a  
117 chromophore for emitting fluorescence (Fig. 1A), we hypothesized that fission yeast could not  
118 metabolize BV intracellularly. Upon the addition of external BV, the nuclear iRFP fluorescence signal  
119 was recovered (Fig. 1B). The titration of BV concentration yielded a dose-dependent increase in iRFP  
120 fluorescence up to 125  $\mu$ M (Fig. 1C). We next examined the kinetics of BV incorporation into fission  
121 yeast cells. Treatment with a high dose of BV (500  $\mu$ M) gradually increased iRFP fluorescence until 24  
122 h, suggesting slow uptake of BV in fission yeast cells (Fig. 1D). Since BV is produced from heme  
123 through HO, we searched for *HO* in the genomes of fission yeast and representative fungal species. As  
124 expected, we could not find any *HO* or *HO*-like gene in fission yeast (Fig. S1). Interestingly, *HO*  
125 and/or *HO*-like genes, which have been found from bacteria to higher eukaryotes, are frequently and  
126 sporadically lost in the representative fungal species (Fig. S1). Indeed, while iRFP has been widely  
127 used in the budding yeast, *Saccharomyces cerevisiae*, which retains an *HO* gene (Wosika et al. 2016;  
128 Yang Li et al. 2017; Geller et al. 2019; Tojima et al. 2019), there have been no studies using iRFP in  
129 the fission yeast, *S.pombe*. Taken together, these facts led us to conclude that iRFP does not fluoresce  
130 in fission yeast due to the lack of BV and *HO*.

131

132

133

134

135

136

137

138

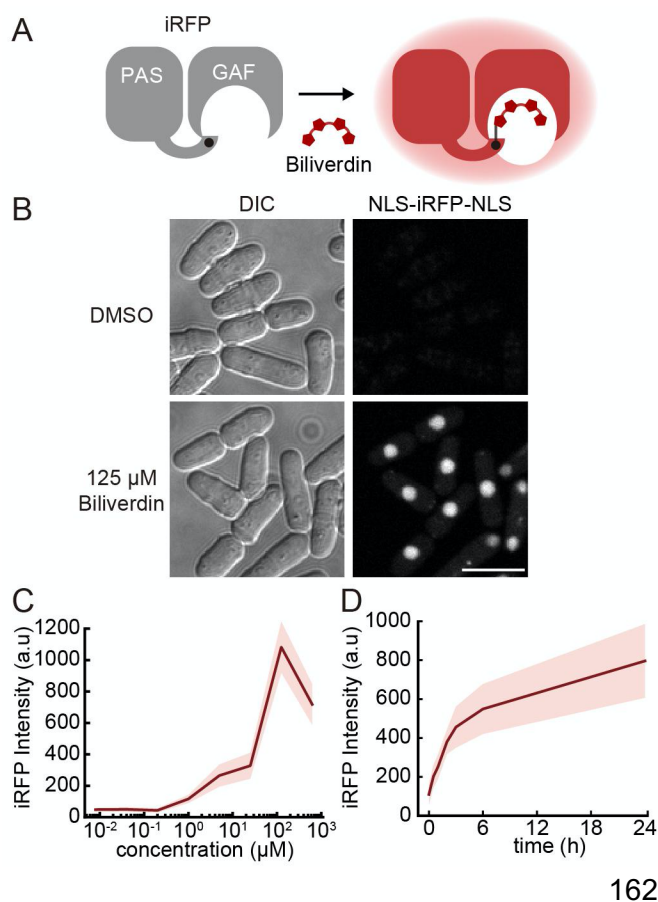

**Fig 1. iRFP does not fluoresce in fission yeast.**

(A) Schematic illustration of chromophore formation of iRFP with biliverdin (BV). BV covalently attaches to iRFP as a chromophore. The PAS domain in iRFP contains a conserved cysteine residue at the N-terminus that covalently attaches to the BV, while the BV itself fits into the cleft in the GAF domain. (B) Representative images of fission yeast expressing NLS-iRFP-NLS with or without external BV treatment. Scale bar, 10  $\mu\text{m}$ . (C) Dose-response curve of iRFP fluorescence as a function of levels of BV incorporation into fission yeast cells. Fission yeast cells were cultured in liquid YEA and incubated at room temperature for 3 h with the indicated concentration of BV (8 nM, 40 nM, 200 nM, 1  $\mu\text{M}$ , 5  $\mu\text{M}$ , 25  $\mu\text{M}$ , 125  $\mu\text{M}$ , and 625  $\mu\text{M}$ ). The red line and shaded area indicate the averaged intensity and S.D., respectively ( $n = 50$  cells). The decrease in iRFP intensity under 625  $\mu\text{M}$  BV could be due to cell death and/or toxicity by the excess DMSO. (D) Time-course of BV incorporation into fission yeast cells. Fission

yeast cells were cultured in liquid YEA with the addition of 500  $\mu\text{M}$  BV at 32°C with shaking, and cells were collected at the indicated points (0.5 h, 1 h, 2 h, 3 h, 6 h, 24 h). The red line and shaded area indicate the averaged intensity and S.D., respectively ( $n = 50$  cells).

### Development of novel stable knock-in plasmids: pSKI

The above results showed that the external supply of BV required a high dose and long-term incubation to realize iRFP fluorescence in fission yeast, which prompted us to seek an alternative route to iRFP fluorescence by introducing genes for the biosynthesis of BV. Before starting to develop the reconstitution system, we developed novel stable integration vectors that met our specific requirements—stable one copy integration into the genome, no effect on the auxotrophy of integrated cells, and distant integration loci for crossing strains—rather than using one of the previously developed integration systems (Keeney and Boeke 1994; Matsuyama et al. 2004; Maundrell 1993; Siam, Dolan, and Forsburg 2004; Fennessy et al. 2014; Kakui et al. 2015; Vještica et al. 2020). At first, we chose three gene-free loci on each chromosome at chromosome I positions 1,508,522 to 1,508,641 (near *mug165*, 1L), chromosome II positions 447,732 to 447,827 (near *pho4*, 2L), and chromosome III positions 1,822,244 to 1,822,343 (near *nup60*, 3R) (Fig. S2A). Next, we designed and developed

179 plasmids that contain genes required for replication and amplification in *E. coli* (*Amp*, *ori*), the  
180 constitutive promoter *Padhl* or inducible promoter *Pnmt1*, a multiple cloning site (MCS), an *adh1*  
181 terminator, a selection marker cassette encoding an antibiotic-resistance gene for fission yeast, and  
182 homology arms connected with the one-cut restriction enzyme recognition site for plasmid linearization  
183 (Fig. S2B). Expected genomic integration with these vectors was confirmed by genomic PCR using  
184 primers designed to span the integration boundary (Fig. S2C). None of these integrations affected the  
185 bulk growth of fission yeast (Fig. S2D), and the protein expression levels from these three loci were  
186 comparable or moderately higher than that from the *Z*-locus (Fig. S2E). We named this series of  
187 plasmids using the prefix pSKI (plasmid for Stably Knock-In, also see Table S1) and used them for the  
188 following experiments.

189

### 190 **PCB brightens iRFP more efficiently than BV in fission yeast**

191 HO is the crucial enzyme in the BV biosynthesis pathway, catalyzing the linearization of tetrapyrrole  
192 (Fig. 2A). Therefore, we established fission yeast cells stably expressing HO1 and NLS-iRFP-NLS  
193 with pSKI and quantified the resulting iRFP fluorescence. As expected, the expression of HO1 derived  
194 from *Thermosynechococcus elongatus* BP-1 in mitochondria, where heme is abundant, demonstrated  
195 iRFP fluorescence, and the iRFP fluorescence was brighter than that achieved by the external addition  
196 of BV (Fig. 2B, second and third columns). Because HO1 is known to catalyze heme in the presence of  
197 reduced Fd (Rhie and Beale 1992), we next examined whether co-expression of HO1 and tFnr-Fd, a  
198 chimeric protein of truncated Fnr and Fd (Uda et al. 2020), would improve HO1-mediated iRFP  
199 fluorescence. However, the co-expression of HO1 and tFnr-Fd in mitochondria did not further enhance  
200 iRFP fluorescence as compared to the expression of only HO1 (Fig. 2B, sixth column), suggesting that  
201 authentic ferredoxin in fission yeast sufficiently supports the catalytic reaction through HO1.

202 Unexpectedly, in a series of experiments, we found a further increment in iRFP fluorescence by  
203 PCB (Fig. 2B, ninth column). When PcyA, the enzyme responsible for the production of PCB from  
204 BV, was co-expressed with HO1 and tFnr-Fd, the level of iRFP fluorescence was higher than other  
205 conditions (Fig. 2B, ninth column). To validate these results, we treated the cells expressing NLS-  
206 iRFP-NLS with purified PCB instead of BV. The addition of external PCB substantially outperformed  
207 the addition of BV with respect to iRFP fluorescence intensity (Fig. 2C and 2D). While the  
208 fluorescence intensities were quite different between PCB-bound iRFP (iRFP-PCB) and BV-bound

209 iRFP (iRFP-BV), the effective concentration of the dose-response curve (Fig. 1C and 2C) and the  
 210 kinetics of chromophore incorporation (Fig. 1D and 2D) were comparable between them.  
 211

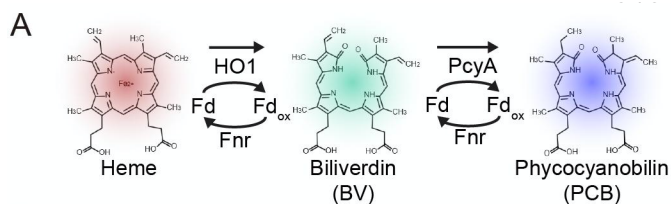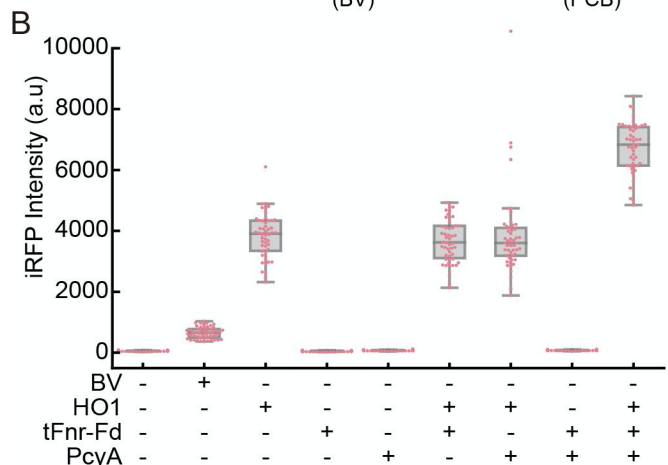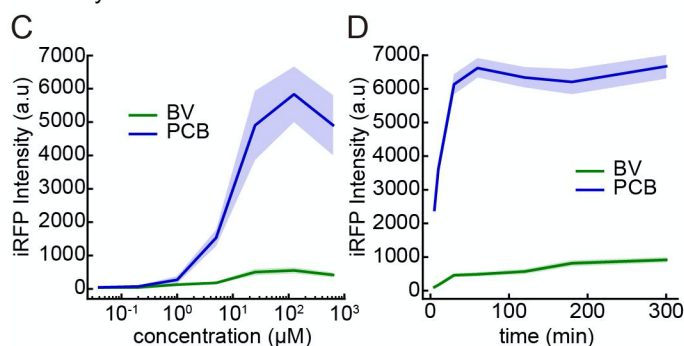

**Fig 2. PCB brightens iRFP more efficiently than BV in fission yeast.**

(A) Schematic illustration of the PCB biosynthesis pathway. (B) Quantification of iRFP fluorescence in fission yeast cells expressing HO1, tFnr-Fd, and PcyA. Under the BV condition, cells were treated with 125  $\mu\text{M}$  BV for 1 h at room temperature. Each dot represents iRFP fluorescence from a single cell with a boxplot, in which the box shows the quartiles of data with the whiskers denoting the minimum and maximum except for the outliers detected by 1.5 times the interquartile range ( $n = 50$  cells). (C) Dose-response curve of iRFP fluorescence as a function of the levels of BV or PCB incorporation into fission yeast cells.

Fission yeast cells were cultured in liquid YEA and incubated at room temperature for 3 h with the indicated concentration of BV or PCB (8 nM, 40 nM, 200 nM, 1  $\mu\text{M}$ , 5  $\mu\text{M}$ , 25  $\mu\text{M}$ , 125  $\mu\text{M}$ , and 625  $\mu\text{M}$ ). The lines and shaded areas indicate the averaged intensities and S.D., respectively ( $n = 50$  cells). The decrease in iRFP intensity under 625  $\mu\text{M}$  PCB or BV could be due to cell death and/or toxicity by the excess DMSO. (D) Time-course of iRFP fluorescence in response to BV or PCB treatment. Fission yeast cells were cultured in liquid YEA and treated with 125  $\mu\text{M}$  BV or PCB at time zero.

241 The lines and shaded areas indicate the averaged intensities and S.D., respectively ( $n = 50$  cells).  
 242  
 243

244 **PCB yields brighter fluorescence as an iRFP chromophore than BV**

245 The above data indicated the possibility that PCB might be a more suitable chromophore for iRFP than  
 246 BV. To prove this hypothesis, we first examined whether the efficiency of holo-iRFP formation  
 247 accounted for the difference in iRFP fluorescence between BV- and PCB-treated cells. PCB was added  
 248 to the cells with HO1 expression, which exhibited constant intracellular production of BV. Therefore,  
 249 iRFP has already formed a holo-complex with BV before attaching to PCB (Fig. 3A). Given that iRFP-  
 250 PCB is brighter than iRFP-BV, we reasoned that HO1 expression attenuated the increase in iRFP



251 fluorescence when the cells were further treated with purified PCB due to the competition between the  
 252 PCB and already existing BV for binding to iRFP. As we expected, the addition of purified PCB hardly  
 253 increased iRFP fluorescence in cells that had been expressing HO1, in spite of the dose-dependent  
 254 increase in iRFP fluorescence by PCB treatment in cells not expressing HO1 (Fig. 3B and 3C). These  
 255 observations reveal that almost all iRFP forms a holo-complex with BV when HO1 is expressed.

256 To understand why iRFP-PCB was brighter than iRFP-BV, we prepared recombinant iRFP  
 257 expressed in *E. coli* and purified apo-iRFP (Filonov et al. 2011) (Fig. S3A). Apo-iRFP was mixed with  
 258 PCB and BV to form holo-iRFP, *i.e.*, iRFP-PCB and iRFP-BV, respectively (Fig. S3B). Binding of  
 259 PCB to iRFP resulted in a change in the absorption spectrum from the free PCB (Fig. 3D). The  
 260 absorbance maximum of iRFP-PCB was 10 nm blue-shifted from that of iRFP-BV (Fig. 3E).  
 261 Fluorescence excitation and emission spectra were also 10 nm blue-shifted in iRFP-PCB compared to  
 262 iRFP-BV (Fig. S3C and S3D). Notably, the fluorescence quantum yield of iRFP-PCB was nearly twice  
 263 as high as that of iRFP-BV (0.094 vs. 0.054), while their molecular extinction coefficient values were  
 264 comparable (Fig. 3F). These results were consistent with the previous work (Stepanenko et al. 2019).  
 265 Based on these results, we concluded that iRFP forms a complex with PCB as a holo-form and that  
 266 iRFP-PCB is brighter than iRFP-BV at the molecular level.

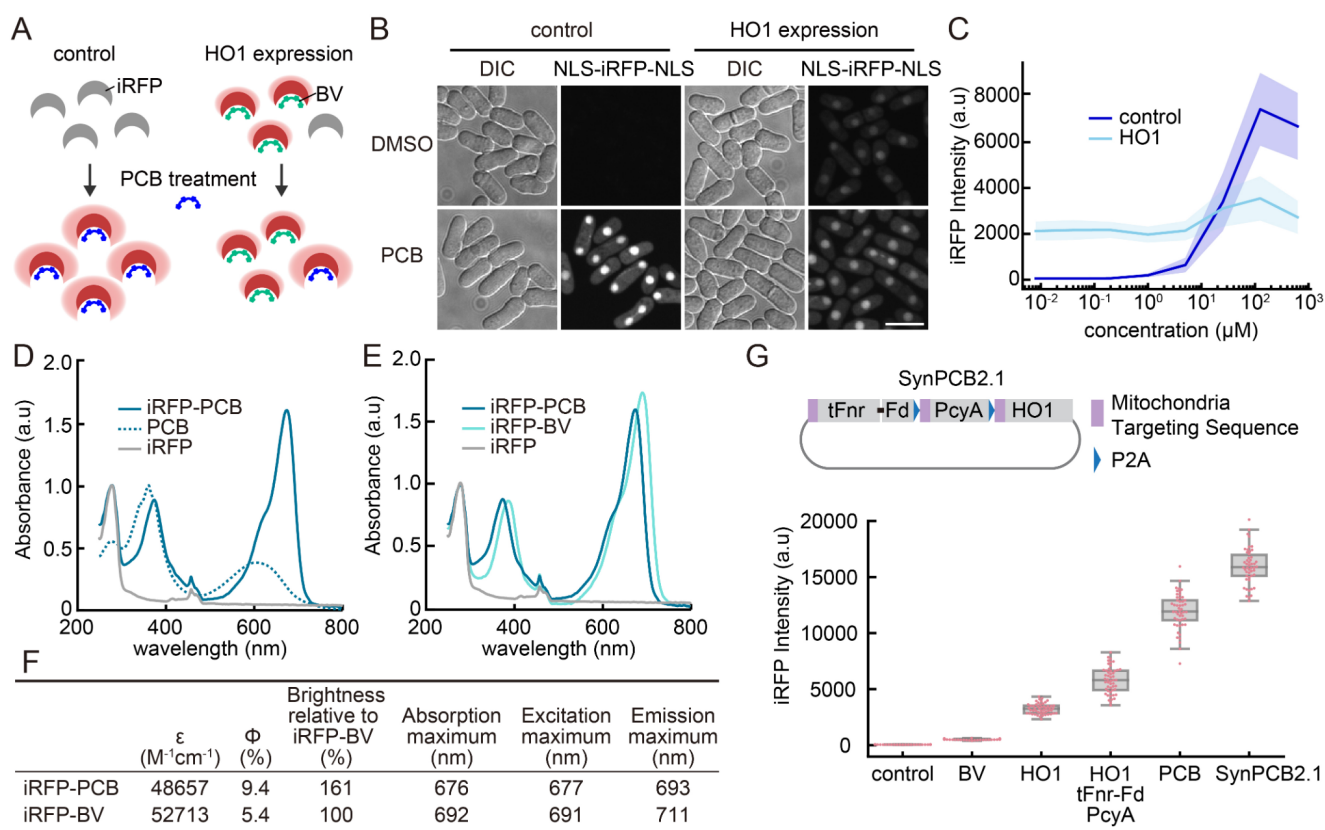

268 **Fig 3. PCB yields brighter fluorescence as an iRFP chromophore than BV.**

269 (A) Schematic illustration of the experimental procedure. In control fission yeast cells, iRFP shows  
270 fluorescence upon the addition of PCB. In HO1 expressing cells, BV binds to iRFP as a chromophore  
271 before the addition of PCB. Therefore, BV competes with PCB for binding to iRFP. (B) Representative  
272 images of fission yeast expressing NLS-iRFP-NLS with or without external PCB (125  $\mu$ M) treatment.  
273 Scale bar, 10  $\mu$ m. (C) Dose-response curve of iRFP fluorescence as a function of the PCB  
274 concentration in a culture of fission yeast cells. Fission yeast cells were cultured in liquid YEA and  
275 incubated at room temperature for 1 h with the indicated concentration of PCB (8 nM, 40 nM, 200 nM,  
276 1  $\mu$ M, 5  $\mu$ M, 25  $\mu$ M, 125  $\mu$ M, and 625  $\mu$ M). The lines and shaded areas indicate the averaged  
277 intensities and S.D., respectively (n = 50 cells). (D) Normalized absorption spectra of PCB-bound iRFP  
278 (iRFP-PCB), free PCB, or iRFP. First, the spectra of iRFP-PCB and iRFP were normalized based on  
279 the absorbance at 280 nm (absorbance of protein), followed by normalization of the PCB spectrum by  
280 the absorbance at 375 nm. Of note, there is a spectrometer artifact at around 450 nm in all spectra. (E)  
281 Normalized absorption spectra of iRFP-PCB, BV-bound iRFP (iRFP-BV), and iRFP. The absorption  
282 spectra were normalized by the absorbance at 280 nm of each spectrum. Of note, there is a  
283 spectrometer artifact at around 450 nm in all spectra. (F) Summary of the fluorescence properties of  
284 iRFP-PCB and iRFP-BV *in vitro*.  $\Phi$  and  $\epsilon$  represent the fluorescence quantum yield and molar  
285 extinction coefficient, respectively. (G) (upper) Structure of the SynPCB2.1 plasmid expressing tFnr-  
286 Fd, PcyA, and HO1. These proteins are tagged with the mitochondria targeting sequence (MTS) at their  
287 N-termini and flanked by P2A, a self-cleaving peptide. (lower) Quantification of iRFP fluorescence  
288 under the indicated conditions. Cells were treated with 125  $\mu$ M BV or PCB for 1 h at room temperature  
289 (second and fifth columns). Each dot represents iRFP fluorescence of a single-cell with a boxplot, in  
290 which the box shows the quartiles of data with the whiskers denoting the minimum and maximum  
291 except for the outliers detected by 1.5 times the interquartile range (n = 50 cells).  
292

293 **SynPCB2.1 is ideal for iRFP imaging in fission yeast**

294 For easy iRFP imaging using PCB as a chromophore, we introduced a system for efficient PCB  
295 biosynthesis, SynPCB2.1, in which the *tFnr-Fd*, *PcyA*, and *HO1* genes are tandemly fused with the  
296 cDNAs of the mitochondrial targeting sequences (MTS) at their N-termini, and flanked by self-  
297 cleaving P2A peptide cDNAs for multicistronic gene expression (Uda et al. 2020) (Fig. 3G). The  
298 single-cassette of SynPCB2.1 genes was knocked-in into cells expressing NLS-iRFP-NLS with a pSKI  
299 vector system, and expressed under the *adh1* promoter. The cells expressing SynPCB2.1 showed higher  
300 iRFP fluorescence than either cells treated with PCB or cells expressing the three genes individually  
301 (Fig. 3G). The protein expression levels of iRFP were comparable between the cells treated with BV  
302 and PCB, and cells expressing HO1 or SynPCB2.1 (Fig. S4). These results indicate that the  
303 chromophore formation of iRFP has little impact on the protein stability of iRFP in fission yeast.

304 To determine to what extent iRFP formed a complex with PCB or BV in cells, we quantified the  
305 fraction of fluorescent iRFP molecules by fluorescence correlation spectroscopy (FCS). FCS is the  
306 technique that exploits temporal fluctuation of fluorescent molecules in the confocal volume (1 fL),

307 enabling to estimate the number of fluorescent molecules in the confocal volume and the diffusion  
308 coefficient (Shi et al. 2009; Sudhaharan et al. 2009; Kinjo, Sakata, and Mikuni 2011). For this purpose,  
309 fission yeast cells expressing iRFP fused with mNeonGreen (iRFP-mNeonGreen) were treated with BV  
310 or PCB or co-expressed with HO1 or SynPCB2.1, and subjected to FCS measurement to quantify the  
311 number of fluorescent iRFP and mNeonGreen molecules (Fig. S5A). The more iRFP forms a complex  
312 with the chromophore and fluoresces in cells, the more the ratio of the number of fluorescent iRFP  
313 molecules to the number of mNeonGreen measured by FCS approaches 1 (Fig. S5A). The cells  
314 expressing iRFP-mNeonGreen and SynPCB2.1, and the cells treated with PCB exhibited the ratio  
315 values of approximately 0.8 and 1.0, respectively (Fig. S5B and S5C), showing that 80-100% of iRFP  
316 forms a complex with PCB under these conditions. Importantly, HO1 expression resulted in the  
317 formation of a holo-iRFP complex with almost the same efficiency as SynPCB2.1 expression (Fig.  
318 S5C). Given the fact that the brightness of iRFP-BV was much weaker than that of iRFP-PCB (Fig.  
319 3G), these results indicate that iRFP-PCB is a substantially brighter fluorescent protein than iRFP-BV  
320 in fission yeast. The external addition of BV resulted in lower values of iRFP to mNeonGreen ratio,  
321 suggesting that the BV incorporation is the rate-limiting step in fission yeast.

322 Next, we measured the emission spectrum of iRFP in a living cell to compare the fluorescence  
323 properties of iRFP-BV and iRFP-PCB. As for the emission spectrum *in vitro*, the cells showed a  
324 distinct emission spectrum between iRFP-PCB and iRFP-BV, namely, a blue-shifted emission  
325 spectrum of iRFP-PCB (Fig. S6A). A similar shift was observed when the emission spectrum of cells  
326 expressing SynPCB2.1 was compared to that of cells expressing HO1 (Fig. S6B and summarized in  
327 Fig. S6E). Importantly, cells separately expressing HO1, tFnr-Fd, and PcyA exhibited an intermediate  
328 emission spectrum, suggesting a mixture of iRFP-BV and iRFP-PCB in this cell line. The presence of  
329 iRFP-BV would explain why iRFP fluorescence by SynPCB2.1 was brighter than that generated by  
330 separate expression of the three enzymes in fission yeast (Fig. 3G). Moreover, the emission spectra  
331 obtained from living fission yeast cells demonstrated that iRFP-PCB was much brighter than iRFP-BV  
332 (Fig. S6C and S6D).

333 To explore the generality of the application of PCB and SynPCB2.1 system to other near-  
334 infrared fluorescent proteins, we measured fluorescence intensities of miRFP670 and miRFP703,  
335 which are derived from a different branch of bacteriophytochrome RpBphP1 (Shcherbakova et al.  
336 2016), in fission yeast treated with BV or PCB or expressing SynPCB2.1 (Fig. S7). The fluorescence  
337 intensities of both miRFP670 and miRFP703 were enhanced by the addition of PCB and the expression

338 of SynPCB2.1 compared to the addition of BV in a similar manner iRFP (Fig. S7). From these data, we  
339 concluded that PCB biosynthesis by SynPCB2.1 is suitable for imaging with near-infrared fluorescent  
340 proteins in fission yeast.

341 During iRFP imaging experiments, we found that PCB synthesized in fission yeast cells  
342 expressing SynPCB2.1 is leaked out of the cells and incorporated into the surrounding cells. To clearly  
343 show the PCB leakage, we co-cultured cells expressing only SynPCB2.1 and cells expressing only  
344 NLS-iRFP-NLS. While neither strains exhibited any fluorescence when cultured singly, NLS-iRFP-  
345 NLS emanated fluorescence when cells were co-cultured with the cells expressing SynPCB2.1 (Fig.  
346 S8B and S8C). The data indicate that in fission yeast, PCB is leaked into the extracellular space.

347

#### 348 **iRFP imaging in fission yeast: Development of endogenous tagging and all-in-one integration** 349 **systems.**

350 To further exploit the advantages of iRFP imaging in fission yeast, we first established C-terminal  
351 tagging plasmids based on a commonly used PCR-based tagging system (Longtine et al. 1998). The  
352 plasmids included an *iRFP* cassette followed by one of four different selection markers (Fig. 4A). By  
353 using these plasmids, we verified endogenous *iRFP* tagging to several genes, including *cdc2* (CDK,  
354 nucleus), *rpb9* (PolII, chromatin), *rpa49* (PolI, nucleolus), *swi6* (heterochromatin), *pds5* (cohesin),  
355 *cut11* (nuclear envelope), *mal3* (microtubule plus-end), *sfi1* (spindle pole body, SPB), *cox4*  
356 (mitochondria), and *cnx1* (endoplasmic reticulum, ER) with the expression of SynPCB2.1. All tested  
357 proteins showed the expected subcellular localization in fission yeast (Fig. 4B), although the signal-to-  
358 noise ratios depended on the expression level of the endogenously tagged proteins.

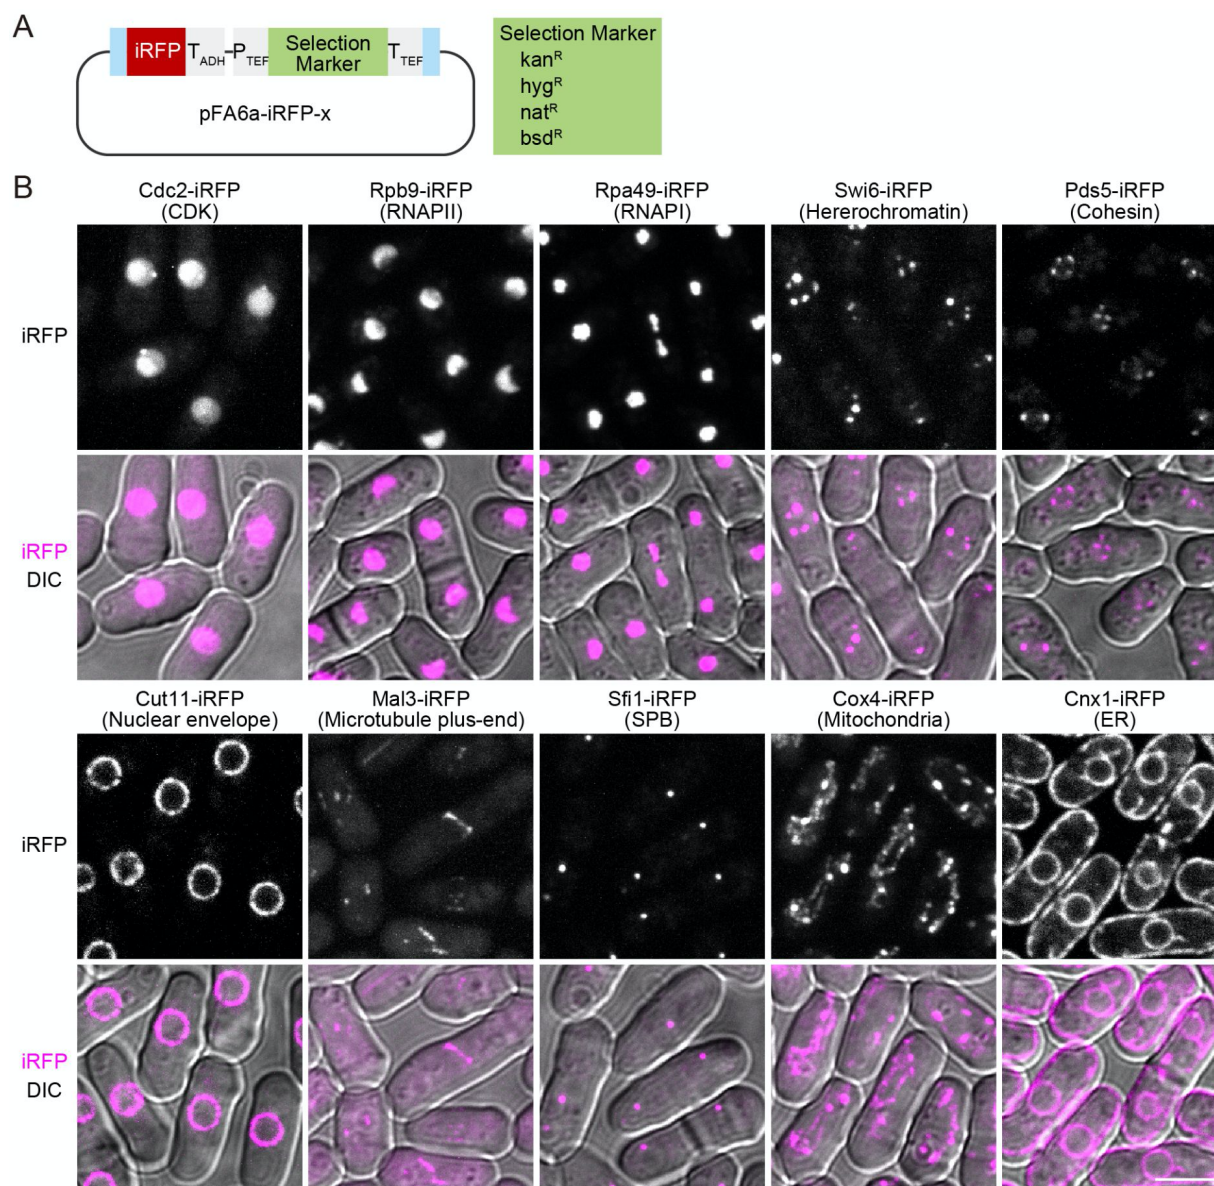

359

360 **Fig 4. Visualization of endogenous proteins by iRFP in fission yeast**

361 (A) Schematic illustration of the plasmid for iRFP tagging of endogenous proteins at the C-terminus.  
 362 Cyan boxes indicate the common overlapping sequences (Longtine et al. 1998). The plasmid list is  
 363 shown in Table S1. (B) The subcellular localization of endogenous proteins tagged with iRFP using  
 364 pFA6a-iRFP. iRFP signals are shown in grayscale in the upper panels, and DIC images are merged with  
 365 magenta iRFP signals and shown in the lower panels. Maximal projection images for iRFP are shown  
 366 except for Cut11-iRFP and Cnx1-iRFP. Scale bar, 5  $\mu$ m.

367

368 Second, we developed all-in-one plasmids carrying SynPCB2.1 and iRFP fusion protein genes  
 369 to avoid a situation in which these two genes occupy two of the limited selection markers and  
 370 integration loci. As a proof-of-concept, we introduced cDNA of Lifeact-iRFP (F-actin marker) or NLS-  
 371 iRFP-NLS (nucleus marker) into the pSKI plasmid with the SynPCB2.1 gene cassette (Fig. 5A and

372 5B). Fission yeast transformed with these plasmids displayed the bright F-actin pattern, including actin  
 373 patches, actin cables, and contractile ring (Fig. 5A) and nucleus (Fig. 5B). Taking full advantage of  
 374 iRFP imaging with the SynPCB2.1 system in fission yeast, we established cells expressing five different  
 375 proteins: The nucleus, plasma membrane, kinetochore, tubulin, and F-actin were labeled with NLS-  
 376 mTagBFP2, Turquoise2-GL-ras1 $\Delta$ N200, endogenous Mis12-mNeonGreen, mCherry-Atb2, and  
 377 Lifact-iRFP, respectively (Fig. 5C).

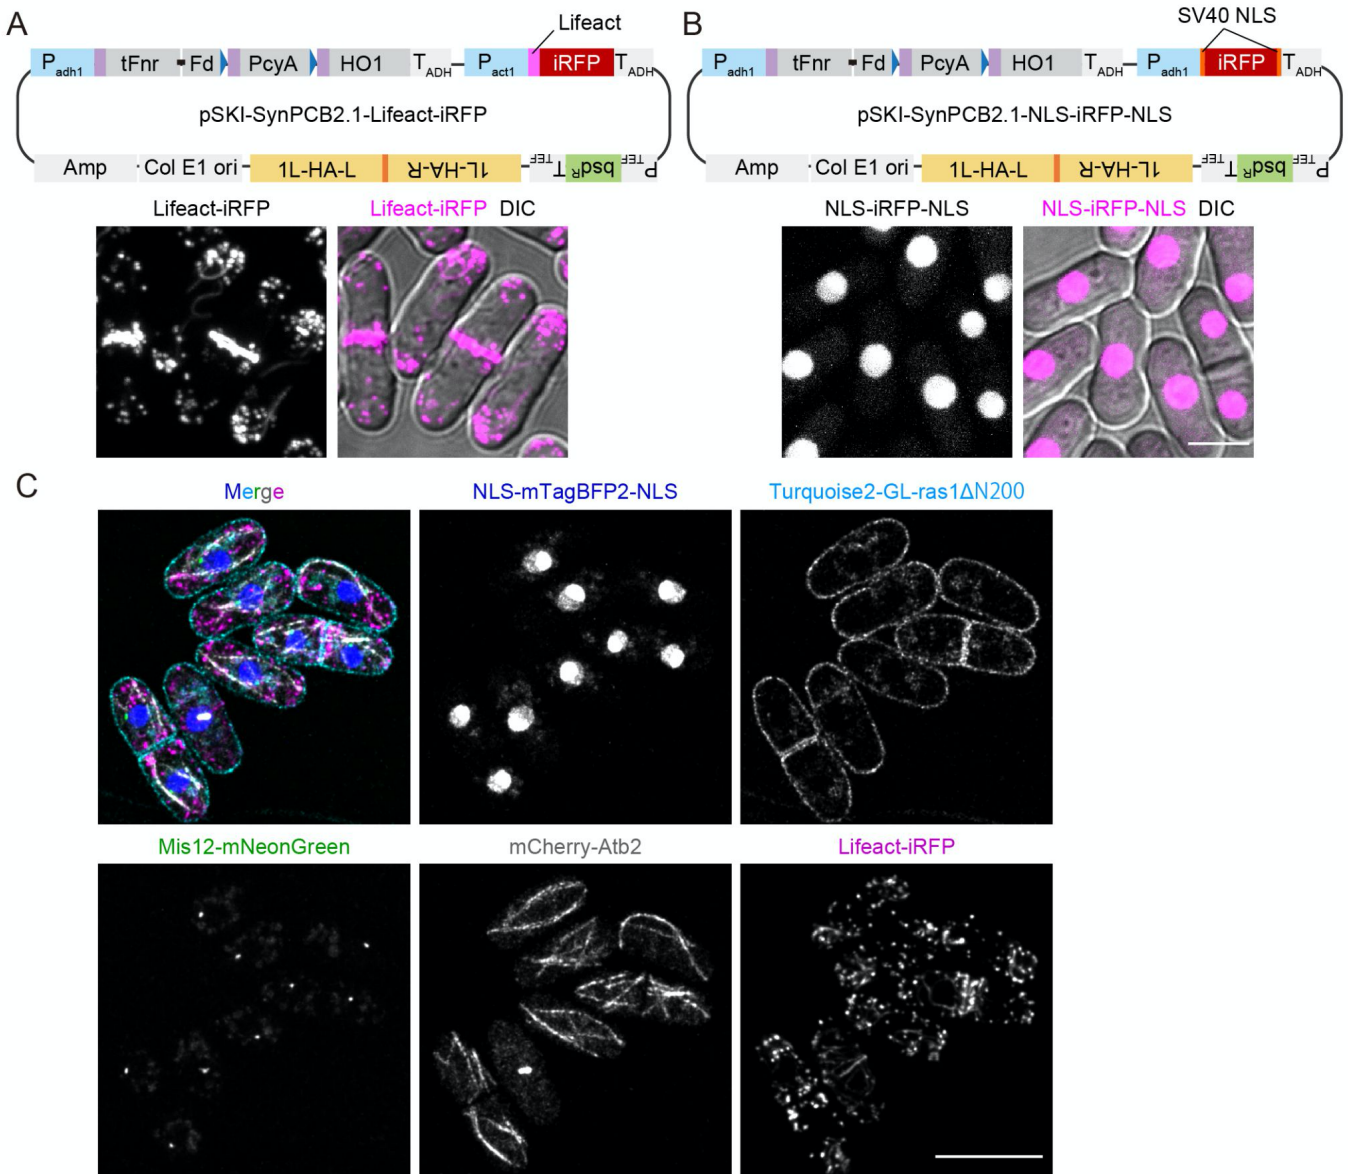

378  
 379 **Fig 5. All-in-one plasmids for iRFP imaging**  
 380 (A) (upper) Schematic illustration of 1L locus integration plasmids for the expression of SynPCB2.1  
 381 and Lifact fused with iRFP (pSKI-SynPCB2.1-Lifact-iRFP). (lower) Representative images of  
 382 fission yeast expressing Lifact-iRFP are shown with the maximal intensity projection image and DIC-  
 383 merged image. (B) (upper) Schematic illustration of 1L locus integration plasmids for the expression of

384 SynPCB2.1 and NLS-iRFP-NLS (pSKI-SynPCB2.1-NLS-iRFP-NLS). (lower) Representative images  
385 of fission yeast expressing NLS-iRFP-NLS are shown with the maximal intensity projection image and  
386 DIC-merged image. Scale bar, 5  $\mu$ m. (C) Multiplexed imaging of fission yeast expressing NLS-  
387 mTagBFP2-NLS (nucleus), Turquoise2-GL-ras1 $\Delta$ N200 (plasma membrane), Mis12-mNeonGreen  
388 (kinetochore), mCherry-Atb2 (tubulin), and Lifeact-iRFP (F-actin). Maximal intensity projection  
389 images (except for Turquoise2-GL-ras1 $\Delta$ N200; single z-section) and a merged image are shown. Scale  
390 bar, 10  $\mu$ m.

391

### 392 **PCB can be used as a chromophore in mammalian cells**

393 Finally, we tested whether PCB could be used as an iRFP chromophore in other organisms. HeLa cells  
394 expressing iRFP along with EGFP, an internal control for iRFP expression, were treated with external  
395 BV or PCB. PCB treatment increased the brightness of iRFP in HeLa cells to the same degree as BV  
396 treatment (Fig. S9A and S9B). BVRA KO HeLa cells displayed higher iRFP fluorescence than did  
397 parental HeLa cells, as reported previously (Kobachi et al. 2020), but did not show any change in iRFP  
398 fluorescence by BV or PCB treatment (Fig. S9B), probably because all iRFP molecules were occupied  
399 by BV. In contrast to fission yeast, the increment of iRFP fluorescence by PCB treatment was  
400 comparable to that by BV treatment in parental HeLa cells (Fig. S9B). Taken together, these results led  
401 us to conclude that PCB is applicable to iRFP imaging in mammalian cells, although it does not offer a  
402 significant advantage over BV.

403

404

## 405 DISCUSSION

406 In this study, we demonstrated that iRFP does not fluoresce in fission yeast because of the lack of the  
407 BV-producing enzyme HO. Moreover, we found that PCB acts as a brighter chromophore for iRFP  
408 than BV both *in vitro* and in fission yeast expressing SynPCB2.1. Although PCB is not an authentic  
409 chromophore for iRFP nor the original RpBphP2, our data strongly suggested that PCB forms a  
410 fluorescent chromophore in iRFP. Finally, we developed endogenous iRFP tagging plasmids and all-in-  
411 one plasmids carrying SynPCB2.1 and iRFP marker proteins for the easy use of near-infrared imaging  
412 in fission yeast. As an alternative to external chromophore addition, the SynPCB2.1 system has  
413 potential advantages for iRFP imaging, including being fully genetically encoded and capable of  
414 providing even brighter iRFP fluorescence in fission yeast.

415 Our data indicate that PCB is more suitable as an iRFP chromophore than BV in fission yeast  
416 for several reasons. The first reason is that iRFP-PCB has a 2-fold higher fluorescence quantum yield  
417 than iRFP-BV *in vitro*. The second reason is that the excitation and emission spectra of iRFP-PCB are  
418 blue-shifted in comparison to those of iRFP-BV. This result is consistent with previous works  
419 describing the blue-shifted spectra of PCB (Rumyantsev et al. 2015; Loughlin et al. 2016). The blue-  
420 shifted spectra of iRFP-PCB possess favorable properties for most conventional confocal microscopes.  
421 Based on the emission and excitation spectrum (Fig. S3C), iRFP-PCB is approximately 1.3-fold more  
422 effectively excited by 640 nm of the excitation laser, and detected about 2.0-fold more efficiently with  
423 our emission filter (665-705 nm emission filter) in comparison to iRFP-BV. The third conceivable  
424 reason is the efficient chromophore formation. Indeed, RpBphP1-derived GAF-FP bound PCB 1.75-  
425 fold more efficiently than BV (Rumyantsev et al. 2015). Based on these data, the rough estimation  
426 yields  $1.61 * 1.3 * 2 * 1.75 = 7.3$ -fold increase, which is comparable with the experimental results showing  
427 the 5~10-fold increase in iRFP-PCB fluorescence compared to iRFP-BV (Figs. 2C, 2D, and 3G). In  
428 contrast to fission yeast, HeLa cells showed no difference in iRFP fluorescence between PCB and BV  
429 (Fig. S9). This could be partly due to the metabolism and culture conditions in mammalian cells,  
430 including synthesis of BV by endogenous HO1, degradation of BV and PCB by BVRA (Terry, Maines,  
431 and Lagarias 1993; Uda et al. 2017; Kobachi et al. 2020), and the presence of BV and bilirubin in the  
432 serum of the culture medium. Based on the results obtained by using fission yeast, we presume that the  
433 existence of BV within a HeLa cell and in the culture medium attenuates the increase in PCB-induced  
434 iRFP fluorescence. Moreover, other tetrapyrroles, such as primarily PPIX, could compete for iRFP  
435 with BV or PCB (Lehtivuori et al. 2013; Wagner et al. 2008).



436 The SynPCB system allows bright iRFP imaging without adding the external chromophores.  
437 This fact led us to consider that PCB might be applicable to other BV-based fluorescent proteins and  
438 optogenetic tools, as with miRFP670 and miRFP703, which exhibited increased fluorescence by  
439 SynPCB. Indeed, near-infrared fluorescent proteins that originate from allophycocyanin and  
440 cyanobacteriochrome, such as smURFP and iRFP670nano, respectively, exhibit high affinity to PCB  
441 because the original cyanobacteriochromes bind specifically to PCB (Rodriguez et al. 2016; Oliinyk et  
442 al. 2019). Bacteriophytochrome-based optogenetic tools using BV (Qian et al. 2020; Monakhov et al.  
443 2020; Kaberniuk, Shemetov, and Verkhusha 2016; Redchuk et al. 2017) would be a potential target for  
444 the application of the SynPCB system. We should note that it is not clear whether PCB, instead of BV,  
445 increases the fluorescence brightness of these near-infrared fluorescent proteins and maintains the  
446 photoresponsive properties of these optogenetic tools. Fission yeast is an ideal model to assess  
447 phytochrome-based tools in a cell, such as the difference between BV and PCB as chromophores and  
448 the efficacy of genetically-encoded chromophore reconstruction because there is neither a synthetic nor  
449 a degradation pathway of BV in fission yeast.

450 We found that the *HO* homologue is frequently lost in fungal species, including the fission yeast  
451 during evolution (Fig. S1). In addition to fungi, *Caenorhabditis elegans*, one of the most popular model  
452 organisms, has shown very low, but not zero, BV-producing activity (Ding et al., 2017). Consistent  
453 with this fact, we could not find an *HO* homologue in the worm genome. The SynPCB system paves  
454 the way to utilizing iRFP for a broader range of organisms that lost an *HO* homologue during  
455 evolution. In addition, we recognized that PCB produced by SynPCB2.1 is leaked from the cells and  
456 taken up by surrounding cells, as evidenced by iRFP fluorescence (Fig. S8). It is possible that the same  
457 events take place under actual ecological conditions; some organisms may exploit tetrapyrroles  
458 produced by other organisms in order to render their own phytochromes functional. In fact, *Aspergillus*  
459 *nidulans* and *Neurospora crassa*, both of which lost an *HO* homologue in their genomes (Fig. S1),  
460 harbor phytochrome genes that are required for chromophores (Blumenstein et al. 2005; Froehlich et al.  
461 2005). The exchanges of tetrapyrroles between living organisms might explain why the *HO* gene is  
462 sporadically lost in many organisms.

463 In this study, we have reported an iRFP imaging platform for fission yeast and a novel  
464 chromosome integration plasmid series, pSKI. The endogenous iRFP tagging system is based on a  
465 commonly used one, allowing anyone to introduce it quickly. The all-in-one plasmids carrying NLS-  
466 iRFP-NLS enable nuclear tracking without occupying green or red color fluorescence channels and

467 automatic analysis of large-scale time-lapse images with nuclear translocation-type sensors (Regot et  
468 al. 2014). Further characterization and engineering will result in wide use of iRFP and phytochrome-  
469 based optogenetic tools in living organisms.

470

## 471 MATERIALS AND METHODS

472

### 473 Plasmids

474 The cDNAs of *PcyA*, *HO1*, *Fd*, and *Fnr* were originally derived from *Thermosynechococcus elongatus*  
475 BP-1 as previously described (Uda et al. 2020). The nucleotide sequence of these genes and SynPCB  
476 were optimized for human codon usage (see Benchling link; Table S1). The mitochondrial targeting  
477 sequence (MTS; MSVLTPLLLRGLTGSARRLP) was derived from human cytochrome C oxidase  
478 subunit VIII. The cDNAs were subcloned into vectors through conventional ligation with Ligation high  
479 Ver.2 (Toyobo, Osaka, Japan) or NEBuilder HiFi DNA Assembly (New England Biolabs, Ipswich,  
480 MA) according to the manufacturers' instruction. The nucleotide sequence of mNeonGreen and  
481 Turquoise2-GL were optimized for fission yeast codon usage (see Benchling link; Table S1). The pSKI  
482 vectors include *Amp*, *colEI ori* (derived from pUC119), selection marker cassettes (derived from  
483 pFA6a-3FLAG-bsd, pFA6a-kan, pAV0587 (pHis5Stul-bleMX), pMNATZA1, and pHBCN1), *Padh1*,  
484 *Tadh1* (derived from pNATZA1), *Pnmt1*, *Tnmt1* (derived from pREP1), and MCSs (synthesized as  
485 oligo DNA (Fasmac)). To construct pSKI-SynPCB2.1-Lifeact-iRFP, *Pact1* (822 bp upstream of the  
486 start codon) was cloned from the fission yeast genome, and the cDNA of Lifeact was introduced by  
487 ligating annealed oligo DNAs. The cDNAs of miRFP670 and miRFP703 were obtained from  
488 pmiRFP670-N1 and pmiRFP703-N1 (gifts from Vladislav Verkusha, Addgene plasmids #79987 and  
489 #79988), and subcloned to obtain pMNATZA1-miRFP670 and pMNATZA1-miRFP703, respectively.  
490 pMNATZA1-iRFP-mNeonGreen was generated by inserting the cDNA of iRFP into the upstream of  
491 the mNeonGreen gene. All plasmids used in this study are listed in Table S1 with Benchling links,  
492 which include the sequences and plasmid maps.

493

### 494 Reagents

495 Biliverdin hydrochloride was purchased from Sigma-Aldrich (30891-50MG), dissolved in DMSO (25  
496 mM stock solution), and stored at  $-30^{\circ}\text{C}$ . PCB was purchased from Santa Cruz Biotechnology (sc-  
497 396921), dissolved in DMSO (5 mM stock solution), and stored at  $-30^{\circ}\text{C}$ . Of note, 625  $\mu\text{M}$  PCB or  
498 625  $\mu\text{M}$  BV is insoluble in PBS solution and fission yeast culture medium, and 25  $\mu\text{M}$  PCB or 25  $\mu\text{M}$   
499 BV is insoluble in mammalian cell culture medium because insoluble PCB or BV debris is observed.

500

### 501 Fission yeast *Schizosaccharomyces pombe* strain and culture

502 All strains made and used in this study are listed in Table S2. The growth medium, sporulation  
503 medium, and other techniques for fission yeast were based on the protocol described previously  
504 (Moreno, Klar, and Nurse 1991) unless otherwise noted. The transformation protocol was modified  
505 from that of (Suga and Hatakeyama 2005). Genome integration by pSKI was confirmed by colony PCR  
506 with KOD One (TOYOBO) and the primers listed in Table S3. For the fluorescence microscope  
507 imaging, the fission yeast cells were concentrated by centrifugation at 3,000 rpm, mounted on a slide  
508 glass, and sealed by a cover glass (Matsunami).

509

### 510 **HeLa cell culture**

511 HeLa cells were the kind gift of Michiyuki Matsuda (Kyoto University). BVRA KO HeLa cells have  
512 been established previously (Uda et al. 2017). HeLa cells were cultured in Dulbecco's Modified  
513 Eagle's Medium (DMEM) high glucose (Wako; Nacalai Tesque) supplemented with 10% fetal bovine  
514 serum (FBS) (Sigma-Aldrich) at 37°C in 5% CO<sub>2</sub>. For the live-cell imaging, HeLa cells were plated on  
515 CELLview cell culture dishes (glass bottom, 35 mm diameter, 4 components: The Greiner Bio-One).  
516 One day after seeding, transfection was performed with 293fectin transfection reagent (Thermo Fisher  
517 Scientific). Two days after transfection, cells were imaged with fluorescence microscopes. BV or PCB  
518 was added into the DMEM medium containing 10% FBS and cultured for 3 h at 37°C in 5% CO<sub>2</sub>.

519

### 520 **Measurement of the growth rate of fission yeast**

521 Fission yeast cells were pre-cultured at 32 °C up to the optical density at 600 nm (OD<sub>600</sub>) of 1.0,  
522 followed by dilution to 1:20. A Compact Rocking Incubator Biophotorecorder TVS062CA (Advantec,  
523 Japan) was used for culture growth (32 °C, 70 rpm) and OD<sub>660</sub> measurement. Growth curves were  
524 fitted by the logistic function ( $x = K / (1 + (K/x_0 - 1)e^{-rt})$ ), and doubling time ( $\ln 2 / r$ ) was calculated on  
525 Python 3 and Scipy.

526

### 527 **Protein purification**

528 For the purification of His-tag fused iRFP, pCold-TEV-linker-iRFP was transformed into BL21(DE3)  
529 pLysS. *E. coli* (Promega, L1195) and selected on LB plates containing 0.1 mg/ml ampicillin at 37°C  
530 overnight. A single colony was picked up and inoculated into 2.5 ml liquid LB medium supplemented  
531 with 0.1 mg/ml ampicillin and 30 µg/ml chloramphenicol at 37°C overnight. The preculture was further  
532 inoculated into 250 mL liquid LB medium (1:100) containing ampicillin and chloramphenicol. The

533 culture was shaken at 37°C for 2–4 h until the OD600 reached 0.6–1.0. The culture was then cooled to  
534 18°C, and 0.25 mM Isopropyl β-D-1-thiogalactopyranoside (IPTG) (Wako, 094-05144) was added to  
535 induce the expression of His fused protein. After overnight incubation at 18°C, cells were collected and  
536 suspended into phosphate-buffered saline (PBS) (Takara, T900) containing 20 mM imidazole (Nacalai  
537 Tesque, 19004-22). Suspended cells were lysed sonication (VP-300N; TAITEC), followed by  
538 centrifugation to collect the supernatant. The supernatant was mixed with 250 μL Ni-NTA sepharose  
539 (Qiagen, 1018244), and incubated at 4°C for 2 h. Protein-bound beads were washed with PBS  
540 containing 20 mM imidazole, and proteins were eluted by the addition of 300 mM imidazole in PBS.  
541 Eluted fractions were checked by SDS-PAGE with a protein molecular weight marker, Precision Plus  
542 Protein™ All Blue Standards (Bio-Rad, #1610373), followed by CBB staining (BIOCRAFT, CBB-  
543 250) and detection by an Odyssey CLx system (Licor). Protein-containing fractions were dialyzed  
544 using a Slide-A-Lyzer Dialysis Cassette 3,500 MWCO (Thermo Scientific, 66110) to remove the  
545 imidazole. To concentrate the recombinant protein, Amicon ultra 3K 500 μL (Millipore, UFC500308)  
546 was used. To measure the protein concentration, Pierce™ BCA Protein Assay Kit (Thermo Scientific,  
547 23227) was used. Purified His-iRFP in PBS solution was mixed with an excess amount (1:5 molar  
548 ratio) of BV or PCB dissolved in DMSO, followed by size exclusion chromatography with NAP-5  
549 Columns (Cytiva, 17085301) to remove free BV or PCB.

550

### 551 **Characterization of *in vitro* fluorescence properties**

552 The absorption of BV (100 μM), PCB (100 μM), and His-iRFP (12 μM) bound to chromophore was  
553 measured by a P330 nanophotometer (IMPLEN) with a 10 mm quartz glass cuvette (TOSOH, T-29M  
554 UV10). The absorption spectrum was measured in a wavelength range of 200 nm to 950 nm. For the  
555 measurements of absolute fluorescence quantum yield, BV or PCB bound His-iRFP (1 μM) in PBS was  
556 subjected to analysis with a Quantaaurus-QY C11347-01 system (Hamamatsu Photonics). The excitation  
557 wavelength was 640 nm. For the measurements of excitation and emission spectra, BV- or PCB- bound  
558 His-iRFP (12 μM) was subjected to analysis with an F-4500 fluorescence spectrophotometer (Hitachi).  
559 The protein solution was excited in a wavelength range of 500 nm to 720 nm, and fluorescence at 730  
560 nm was detected to measure the excitation spectrum. To measure the emission spectrum, the protein  
561 solution was excited at 640 nm, and fluorescence was detected in a wavelength range of 660 nm to 800  
562 nm.

563

564 **Measurement of *in vivo* emission spectrum**

565 The lambda-scan function of the Leica SP8 Falcon confocal microscope system was used for the  
566 measurement of the fluorescence emission spectrum. The excitation wavelength was fixed at 633 nm,  
567 and the 20 nm emission window was slid in 3 nm increments from 650 nm to 768 nm. Each emission  
568 spectrum was normalized by the peak emission value.

569

570 **Live-cell fluorescence imaging**

571 Cells were imaged with an IX83 inverted microscope (Olympus) equipped with an sCMOS camera  
572 (ORCA-Fusion BT; Hamamatsu Photonics), an oil objective lens (UPLXAPO 100X, NA = 1.45, WD =  
573 0.13 mm or UPLXAPO 60X, NA = 1.42, WD = 0.15 mm; Olympus), and a spinning disk confocal unit  
574 (CSU-W1; Yokogawa Electric Corporation). The excitation laser and fluorescence filter settings were  
575 as follows: excitation laser, 488 nm and 640 nm for mNeonGreen (or EGFP) and iRFP, respectively;  
576 excitation dichroic mirror, DM405/488/561/640; emission filters, 525/50 for mNeonGreen or EGFP,  
577 and 685/40 for iRFP (Yokogawa Electric). For the five colors multiplexed imaging, cells were imaged  
578 with Leica SP8 Falcon (Leica) equipped with an oil objective lens (HCPL APO CS2 100x/1.40 OIL).  
579 The excitation laser and fluorescence detectors settings were as follows: excitation laser, 405 nm, 470  
580 nm, 488 nm, 560 nm, and 633 nm for mTagBFP2, Turquoise2-GL, mNeonGreen, mCherry, and iRFP,  
581 respectively; detector bandwidth, 420-450 nm, 480-500 nm, 500-550 nm, 580-650 nm, and 680-780 nm  
582 for mTagBFP2, Turquoise2-GL, mNeonGreen, mCherry, and iRFP, respectively. Images were obtained  
583 with 10 Z-slices of 0.5  $\mu\text{m}$  intervals. Images were subjected to deconvolution by Lightning (Leica).

584

585 **Imaging analysis**

586 All fluorescence imaging data were analyzed and quantified by Fiji (Image J). The background was  
587 subtracted by the rolling-ball method. Some images were obtained with 10–30 Z-slices of 0.2  $\mu\text{m}$   
588 intervals and shown as 2D images by the maximal intensity projection as noted in each figure legend.  
589 For the quantification of signal intensity, appropriate regions of interest (ROIs) were manually selected,  
590 and mean intensities in ROIs were measured.

591

592 **Fluorescence correlation spectroscopy (FCS) measurement and analysis**

593 Time-series data of fluorescence fluctuation were obtained by Leica SP8 Falcon confocal microscope  
594 equipped with an objective lens HC PL APO 63x/1.20 W motCORR CS2, and were analyzed on Leica

595 software essentially as described previously (Sadaie, Harada, and Matsuda 2014; Komatsubara et al.  
596 2019). The structural parameter and effective confocal volume were calibrated using 500 nm  
597 Rhodamine 6G (TCI, cat #R0039) in DDW based on the result that the diffusion constant of  
598 Rhodamine 6G in DDW is  $414 \mu\text{m}^2/\text{s}$  at room temperature (C. B. Müller et al. 2008). The Rhodamine  
599 6G solution was measured with 561 nm excitation and the emission from 580 nm to 700 nm. Structural  
600 parameter and the effective confocal volume were estimated as 3.70 and 0.616 fL, respectively. Fission  
601 yeast cells expressing iRFP-mNeonGreen fusion protein, whose molecule ratio of iRFP to  
602 mNeonGreen was 1:1, were measured as follow: excitation wavelength, 488 nm (mNeonGreen) and  
603 640 nm (iRFP); emission window, from 500 nm to 620 nm (mNeonGreen) and from 680 nm to 768 nm  
604 (iRFP). Note that iRFP excitation laser power was increased when iRFP-BV was measured due to its  
605 dim fluorescence compared to iRFP-PCB. The time-series data of fluorescence fluctuation were  
606 obtained for 30 seconds, corrected by the photobleach correction algorithm on Leica FCS analysis  
607 software, and subject to the calculation of the auto-correlation function  $G(\tau)$  on Leica FCS analysis  
608 software. The calculated auto-correlation functions were fitted with the equation concerning a single-  
609 component normal diffusion and triplet model on Leica FCS analysis software. The reciprocal of  $G(\tau =$   
610  $0)$ , which is the amplitude of the correlation function, corresponds to the number of fluorescent  
611 molecules ( $N$ ) in the confocal volume as  $N = 1/G(\tau = 0)$ . To estimate the fraction of holo-iRFP in all  
612 iRFPs, the number of fluorescent iRFP molecules was divided by that of fluorescent mNeonGreen  
613 molecules, assuming that all mNeonGreen formed chromophores.

614

### 615 **Analysis of *HO*-like sequences in representative species**

616 We searched for *HO*-like sequences in representative fungal species using BLASTp (for details, see  
617 Table S4). We adopted human *HO1* (Uniprot P09601) and *S. cerevisiae* *HMX1* (Uniprot P32339) as the  
618 queries (e-value <  $1e^{-5}$ ). The phylogenetic relationship is based on recent studies using multiple genes  
619 (Nguyen et al. 2017; Yuanning Li et al. 2021). We have manually drawn the evolutionary relationship  
620 among representative species (Nguyen et al. 2017) based on a recent genome-scale phylogeny  
621 (Yuanning Li et al. 2021), which is consistent with the current consensus view of the fungal tree of life  
622 (James et al. 2020). Since the results suggested sequence divergence among *HO1* homologues, we also  
623 used *HO*-like proteins of *Laccaria bicolor* and *Saitoella complicata* obtained from the BLASTp hits,  
624 although no additional sequence was found. Note that the absence in *Aspergillus nidulans* and the  
625 existence in *Candida albicans* are consistent with previous studies (Blumenstein et al. 2005; Pendrak et

626 al. 2004). Concerning *C. elegans*, we searched for an *HO*-like sequence by the BLASTp interface  
627 provided on the WormBase website (<http://www.wormbase.org>, release WS280, date 20-Dec-2020,  
628 database version WS279). We used the same protein queries, *i.e.*, human *HO1* and *S. cerevisiae HMX1*,  
629 although we obtained no hits (e-value < 1e-2).

630

631



632 **Acknowledgments**

633 We thank all members of the Aoki Laboratory for their helpful discussions and assistance. The  
634 pCold-TEV plasmid was a kind gift of Dr. Koichi Kato (ExCELLS). We thank Dr. Takuya Norizuki  
635 for his critical reading and comments. Some fission yeast strains were provided by the National Bio-  
636 Resource Project (NBRP), Japan. We thank the Functional Genomics Facility of the NIBB Core  
637 Research Facilities for their technical support with fluorescence spectrometry.

638

639 **Competing Interests**

640 The authors declare no competing or financial interest.

641

642 **Author contributions**

643 Conceptualization: Y.G.; Data curation: Y.G., K.S., Y.K.; Formal analysis: Y.G., K.S., Y.K.;  
644 Funding acquisition: Y.K., M.K., Y.G., K.A.; Investigation: Y.G., K.S., Y.K., H.F, M.K.;  
645 Methodology: Y.G., K.S., Y.K., H.F, M.K.; Project administration: Y.G., K.A.; Resources: Y.G., K.S.,  
646 H.F, M.K.; Supervision: K.A., Y.G.; Visualization: Y.G., K.S., Y.K.; Validation: Y.G., K.S., Y.K.;  
647 Writing - original draft: Y.G., K.S., Y.K., K.A.; Writing - review & editing: Y.G., K.S., Y.K., K.A.

648

649 **Funding**

650 K.A. was supported by a CREST, JST Grant (JPMJCR1654), JSPS KAKENHI Grants (nos.  
651 18H02444 and 19H05798), and the ONO Medical Research Foundation. Y.G. was supported by a JSPS  
652 KAKENHI Grant (no.19K16050), a Jigami Yoshifumi Memorial Research Grant, and a Sumitomo  
653 Research grant. Y.K. was supported by JSPS KAKENHI Grants (nos. 19K16207 and 19H05675).

654

## 655 References

- 656 Beale, Samuel I. 1993. “Biosynthesis of Phycobilins.” *Chemical Reviews* 93 (2): 785–802.
- 657 Blumenstein, Anne, Kay Vienken, Ronja Tasler, Janina Purschwitz, Daniel Veith, Nicole Frankenberg-  
658 Dinkel, and Reinhard Fischer. 2005. “The *Aspergillus Nidulans* Phytochrome FphA Represses  
659 Sexual Development in Red Light.” *Current Biology: CB* 15 (20): 1833–38.
- 660 Chernov, Konstantin G., Taras A. Redchuk, Evgeniya S. Omelina, and Vladislav V. Verkhusha. 2017.  
661 “Near-Infrared Fluorescent Proteins, Biosensors, and Optogenetic Tools Engineered from  
662 Phytochromes.” *Chemical Reviews* 117 (9): 6423–46.
- 663 Cornejo, J., R. D. Willows, and S. I. Beale. 1998. “Phytobilin Biosynthesis: Cloning and Expression of  
664 a Gene Encoding Soluble Ferredoxin-Dependent Heme Oxygenase from *Synechocystis* Sp. PCC  
665 6803.” *The Plant Journal: For Cell and Molecular Biology* 15 (1): 99–107.
- 666 Ding, Wen-Long, Dan Miao, Ya-Nan Hou, Su-Ping Jiang, Bao-Qin Zhao, Ming Zhou, Hugo Scheer,  
667 and Kai-Hong Zhao. 2017. “Small Monomeric and Highly Stable near-Infrared Fluorescent  
668 Markers Derived from the Thermophilic Phycobiliprotein, ApcF2.” *Biochimica et Biophysica  
669 Acta, Molecular Cell Research* 1864 (10): 1877–86.
- 670 Fennessy, Dorota, Agnes Grallert, Andrea Krapp, Adisa Cokoja, Alan J. Bridge, Janni Petersen,  
671 Avinash Patel, et al. 2014. “Extending the *Schizosaccharomyces Pombe* Molecular Genetic  
672 Toolbox.” *PloS One* 9 (5): e97683.
- 673 Filonov, Grigory S., Kiryl D. Piatkevich, Li-Min Ting, Jinghang Zhang, Kami Kim, and Vladislav V.  
674 Verkhusha. 2011. “Bright and Stable near-Infrared Fluorescent Protein for in Vivo Imaging.”  
675 *Nature Biotechnology* 29 (8): 757–61.
- 676 Frankenberg, N., K. Mukougawa, T. Kohchi, and J. C. Lagarias. 2001. “Functional Genomic Analysis  
677 of the HY2 Family of Ferredoxin-Dependent Bilin Reductases from Oxygenic Photosynthetic  
678 Organisms.” *The Plant Cell* 13 (4): 965–78.
- 679 Froehlich, Allan C., Bosl Noh, Richard D. Vierstra, Jennifer Loros, and Jay C. Dunlap. 2005. “Genetic  
680 and Molecular Analysis of Phytochromes from the Filamentous Fungus *Neurospora Crassa*.”  
681 *Eukaryotic Cell* 4 (12): 2140–52.
- 682 Fushimi, Keiji, Takatsugu Miyazaki, Yuto Kuwasaki, Takahiro Nakajima, Tatsuro Yamamoto, Kazushi  
683 Suzuki, Yoshiyumi Ueda, et al. 2019. “Rational Conversion of Chromophore Selectivity of  
684 Cyanobacteriochromes to Accept Mammalian Intrinsic Biliverdin.” *Proceedings of the National  
685 Academy of Sciences of the United States of America* 116 (17): 8301–9.
- 686 Fushimi, Keiji, and Rei Narikawa. 2021. “Phytochromes and Cyanobacteriochromes: Photoreceptor  
687 Molecules Incorporating a Linear Tetrapyrrole Chromophore.” In *Optogenetics: Light-Sensing  
688 Proteins and Their Applications in Neuroscience and Beyond*, edited by Hiromu Yawo, Hideki  
689 Kandori, Amane Koizumi, and Ryoichiro Kageyama, 167–87. Singapore: Springer Singapore.
- 690 Gambetta, G. A., and J. C. Lagarias. 2001. “Genetic Engineering of Phytochrome Biosynthesis in  
691 Bacteria.” *Proceedings of the National Academy of Sciences of the United States of America* 98  
692 (19): 10566–71.
- 693 Geller, Stephanie H., Enoch B. Antwi, Barbara Di Ventura, and Megan N. McClean. 2019.  
694 “Optogenetic Repressors of Gene Expression in Yeasts Using Light-Controlled Nuclear  
695 Localization.” *Cellular and Molecular Bioengineering* 12 (5): 511–28.
- 696 Hochrein, Lena, Fabian Machens, Katrin Messerschmidt, and Bernd Mueller-Roeber. 2017. “PhiReX:  
697 A Programmable and Red Light-Regulated Protein Expression Switch for Yeast.” *Nucleic Acids  
698 Research* 45 (15): 9193–9205.
- 699 James, Timothy Y., Jason E. Stajich, Chris Todd Hittinger, and Antonis Rokas. 2020. “Toward a Fully  
700 Resolved Fungal Tree of Life.” *Annual Review of Microbiology* 74 (September): 291–313.

- 701 Kaberniuk, Andrii A., Anton A. Shemetov, and Vladislav V. Verkhusha. 2016. “A Bacterial  
702 Phytochrome-Based Optogenetic System Controllable with near-Infrared Light.” *Nature Methods*  
703 13 (7): 591–97.
- 704 Kakui, Yasutaka, Tomonari Sunaga, Kunio Arai, James Dodgson, Liang Ji, Attila Csikász-Nagy,  
705 Rafael Carazo-Salas, and Masamitsu Sato. 2015. “Module-Based Construction of Plasmids for  
706 Chromosomal Integration of the Fission Yeast *Schizosaccharomyces Pombe*.” *Open Biology* 5 (6):  
707 150054.
- 708 Kamper, Maria, Haisen Ta, Nickels A. Jensen, Stefan W. Hell, and Stefan Jakobs. 2018. “Near-Infrared  
709 STED Nanoscopy with an Engineered Bacterial Phytochrome.” *Nature Communications* 9 (1):  
710 4762.
- 711 Keeney, J. B., and J. D. Boeke. 1994. “Efficient Targeted Integration at *leu1-32* and *ura4-294* in  
712 *Schizosaccharomyces Pombe*.” *Genetics* 136 (3): 849–56.
- 713 Kinjo, Masataka, Hiroshi Sakata, and Shintaro Mikuni. 2011. “Basic Fluorescence Correlation  
714 Spectroscopy Setup and Measurement.” *Cold Spring Harbor Protocols* 6 (10): 1262–66.
- 715 Kobachi, Kenju, Sota Kuno, Shinya Sato, Kenta Sumiyama, Michiyuki Matsuda, and Kenta Terai.  
716 2020. “Biliverdin Reductase-A Deficiency Brighten and Sensitize Biliverdin-Binding  
717 Chromoproteins.” *Cell Structure and Function* 45 (2): 131–41.
- 718 Kohchi, T., K. Mukougawa, N. Frankenberg, M. Masuda, A. Yokota, and J. C. Lagarias. 2001. “The  
719 *Arabidopsis* HY2 Gene Encodes Phytochromobilin Synthase, a Ferredoxin-Dependent Biliverdin  
720 Reductase.” *The Plant Cell* 13 (2): 425–36.
- 721 Komatsubara, Akira T., Yuhei Goto, Yohei Kondo, Michiyuki Matsuda, and Kazuhiro Aoki. 2019.  
722 “Single-Cell Quantification of the Concentrations and Dissociation Constants of Endogenous  
723 Proteins.” *The Journal of Biological Chemistry* 294 (15): 6062–72.
- 724 Kyriakakis, Phillip, Marianne Catanho, Nicole Hoffner, Walter Thavarajah, Vincent J. Hu, Syh-Shiuan  
725 Chao, Athena Hsu, et al. 2018. “Biosynthesis of Orthogonal Molecules Using Ferredoxin and  
726 Ferredoxin-NADP+ Reductase Systems Enables Genetically Encoded PhyB Optogenetics.” *ACS*  
727 *Synthetic Biology* 7 (2): 706–17.
- 728 Lambert, Talley J. 2019. “FPbase: A Community-Editable Fluorescent Protein Database.” *Nature*  
729 *Methods* 16 (4): 277–78.
- 730 Landgraf, F. T., C. Forreiter, A. Hurtado Picó, T. Lamparter, and J. Hughes. 2001. “Recombinant  
731 Holophytochrome in *Escherichia Coli*.” *FEBS Letters* 508 (3): 459–62.
- 732 Lehtivuori, Heli, Ilona Rissanen, Heikki Takala, Jaana Bamford, Nikolai V. Tkachenko, and Janne A.  
733 Ihalainen. 2013. “Fluorescence Properties of the Chromophore-Binding Domain of  
734 Bacteriophytochrome from *Deinococcus Radiodurans*.” *The Journal of Physical Chemistry. B* 117  
735 (38): 11049–57.
- 736 Li, Yang, Meng Jin, Richard O’Laughlin, Philip Bittihn, Lev S. Tsimring, Lorraine Pillus, Jeff Hasty,  
737 and Nan Hao. 2017. “Multigenerational Silencing Dynamics Control Cell Aging.” *Proceedings of*  
738 *the National Academy of Sciences of the United States of America* 114 (42): 11253–58.
- 739 Li, Yuanning, Jacob L. Steenwyk, Ying Chang, Yan Wang, Timothy Y. James, Jason E. Stajich, Joseph  
740 W. Spatafora, et al. 2021. “A Genome-Scale Phylogeny of the Kingdom Fungi.” *Current Biology:*  
741 *CB* 31 (8): 1653–65.e5.
- 742 Longtine, M. S., A. McKenzie 3rd, D. J. Demarini, N. G. Shah, A. Wach, A. Brachat, P. Philippsen,  
743 and J. R. Pringle. 1998. “Additional Modules for Versatile and Economical PCR-Based Gene  
744 Deletion and Modification in *Saccharomyces Cerevisiae*.” *Yeast* 14 (10): 953–61.
- 745 Loughlin, Patrick C., Zane Duxbury, Tendo T. Mukasa Mugerwa, Penelope M. C. Smith, Robert D.  
746 Willows, and Min Chen. 2016. “Spectral Properties of Bacteriophytochrome AM1\_5894 in the  
747 Chlorophyll D-Containing Cyanobacterium *Acaryochloris Marina*.” *Scientific Reports* 6 (June):

- 748 27547.
- 749 Matlashov, Mikhail E., Daria M. Shcherbakova, Jonatan Alvelid, Mikhail Baloban, Francesca  
750 Pennacchietti, Anton A. Shemetov, Ilaria Testa, and Vladislav V. Verkhusha. 2020. “A Set of  
751 Monomeric near-Infrared Fluorescent Proteins for Multicolor Imaging across Scales.” *Nature*  
752 *Communications* 11 (1): 239.
- 753 Matsuyama, Akihisa, Atsuko Shirai, Yoko Yashiroda, Ayako Kamata, Sueharu Horinouchi, and  
754 Minoru Yoshida. 2004. “pDUAL, a Multipurpose, Multicopy Vector Capable of Chromosomal  
755 Integration in Fission Yeast.” *Yeast* 21 (15): 1289–1305.
- 756 Maundrell, K. 1993. “Thiamine-Repressible Expression Vectors pREP and pRIP for Fission Yeast.”  
757 *Gene* 123: 127–30.
- 758 Miura, Haruko, Yohei Kondo, Michiyuki Matsuda, and Kazuhiro Aoki. 2018. “Cell-to-Cell  
759 Heterogeneity in p38-Mediated Cross-Inhibition of JNK Causes Stochastic Cell Death.” *Cell*  
760 *Reports* 24 (10): 2658–68.
- 761 Monakhov, Mikhail V., Mikhail E. Matlashov, Michelangelo Colavita, Chenchen Song, Daria M.  
762 Shcherbakova, Srdjan D. Antic, Vladislav V. Verkhusha, and Thomas Knöpfel. 2020. “Screening  
763 and Cellular Characterization of Genetically Encoded Voltage Indicators Based on Near-Infrared  
764 Fluorescent Proteins.” *ACS Chemical Neuroscience* 11 (21): 3523–31.
- 765 Moreno, Sergio, Amar Klar, and Paul Nurse. 1991. “Molecular Genetic Analysis of Fission Yeast  
766 *Schizosaccharomyces Pombe*.” *Methods in Enzymology* 194: 795–823.
- 767 Mukougawa, Keiko, Hirosuke Kanamoto, Toshikazu Kobayashi, Akiho Yokota, and Takayuki Kohchi.  
768 2006. “Metabolic Engineering to Produce Phytochromes with Phytochromobilin,  
769 Phycocyanobilin, or Phycoerythrobilin Chromophore in *Escherichia Coli*.” *FEBS Letters* 580 (5):  
770 1333–38.
- 771 Müller, C. B., A. Loman, V. Pacheco, F. Koberling, D. Willbold, W. Richtering, and J. Enderlein.  
772 2008. “Precise Measurement of Diffusion by Multi-Color Dual-Focus Fluorescence Correlation  
773 Spectroscopy.” *EPL* 83 (4): 46001.
- 774 Müller, Konrad, Raphael Engesser, Jens Timmer, Ferenc Nagy, Matias D. Zurbriggen, and Wilfried  
775 Weber. 2013. “Synthesis of Phycocyanobilin in Mammalian Cells.” *Chemical Communications* 49  
776 (79): 8970–72.
- 777 Muramoto, T., T. Kohchi, A. Yokota, I. Hwang, and H. M. Goodman. 1999. “The Arabidopsis  
778 Photomorphogenic Mutant hyl Is Deficient in Phytochrome Chromophore Biosynthesis as a  
779 Result of a Mutation in a Plastid Heme Oxygenase.” *The Plant Cell* 11 (3): 335–48.
- 780 Nguyen, Tu Anh, Ousmane H. Cissé, Jie Yun Wong, Peng Zheng, David Hewitt, Minou Nowrousian,  
781 Jason E. Stajich, and Gregory Jedd. 2017. “Innovation and Constraint Leading to Complex  
782 Multicellularity in the Ascomycota.” *Nature Communications* 8 (February): 14444.
- 783 Oliinyk, Olena S., Anton A. Shemetov, Sergei Pletnev, Daria M. Shcherbakova, and Vladislav V.  
784 Verkhusha. 2019. “Smallest near-Infrared Fluorescent Protein Evolved from  
785 Cyanobacteriochrome as Versatile Tag for Spectral Multiplexing.” *Nature Communications* 10  
786 (1): 279.
- 787 Pendrak, Michael L., Mark P. Chao, S. Steve Yan, and David D. Roberts. 2004. “Heme Oxygenase in  
788 *Candida Albicans* Is Regulated by Hemoglobin and Is Necessary for Metabolism of Exogenous  
789 Heme and Hemoglobin to  $\alpha$ -Biliverdin\*.” *The Journal of Biological Chemistry* 279 (5): 3426–33.
- 790 Piatkevich, Kiryl D., Ho-Jun Suk, Suhasa B. Kodandaramaiah, Fumiaki Yoshida, Ellen M. DeGennaro,  
791 Mikhail Drobizhev, Thomas E. Hughes, Robert Desimone, Edward S. Boyden, and Vladislav V.  
792 Verkhusha. 2017. “Near-Infrared Fluorescent Proteins Engineered from Bacterial Phytochromes  
793 in Neuroimaging.” *Biophysical Journal* 113 (10): 2299–2309.
- 794 Qian, Yong, Danielle M. Orozco Cosio, Kiryl D. Piatkevich, Sarah Aufmkolk, Wan-Chi Su, Orhan T.

- 795 Celiker, Anne Schohl, et al. 2020. “Improved Genetically Encoded near-Infrared Fluorescent  
796 Calcium Ion Indicators for in Vivo Imaging.” *PLoS Biology* 18 (11): e3000965.
- 797 Redchuk, Taras A., Evgeniya S. Omelina, Konstantin G. Chernov, and Vladislav V. Verkhusha. 2017.  
798 “Near-Infrared Optogenetic Pair for Protein Regulation and Spectral Multiplexing.” *Nature*  
799 *Chemical Biology* 13 (6): 633–39.
- 800 Regot, Sergi, Jacob J. Hughey, Bryce T. Bajar, Silvia Carrasco, and Markus W. Covert. 2014. “High-  
801 Sensitivity Measurements of Multiple Kinase Activities in Live Single Cells.” *Cell* 157 (7): 1724–  
802 34.
- 803 Rhie, G., and S. I. Beale. 1992. “Biosynthesis of Phycobilins. Ferredoxin-Supported Nadph-  
804 Independent Heme Oxygenase and Phycobilin-Forming Activities from *Cyanidium Caldarium*.”  
805 *The Journal of Biological Chemistry* 267 (23): 16088–93.
- 806 Rodriguez, Erik A., Geraldine N. Tran, Larry A. Gross, Jessica L. Crisp, Xiaokun Shu, John Y. Lin,  
807 and Roger Y. Tsien. 2016. “A Far-Red Fluorescent Protein Evolved from a Cyanobacterial  
808 Phycobiliprotein.” *Nature Methods* 13 (9): 763–69.
- 809 Rogers, Oliver C., Dorothy M. Johnson, and Elad Firnberg. 2019. “mRhubarb: Engineering of  
810 Monomeric, Red-Shifted, and Brighter Variants of iRFP Using Structure-Guided Multi-Site  
811 Mutagenesis.” *Scientific Reports* 9 (1): 15653.
- 812 Rumyantsev, Konstantin A., Daria M. Shcherbakova, Natalia I. Zakharova, Alexander V. Emelyanov,  
813 Konstantin K. Turoverov, and Vladislav V. Verkhusha. 2015. “Minimal Domain of Bacterial  
814 Phytochrome Required for Chromophore Binding and Fluorescence.” *Scientific Reports* 5  
815 (December): 18348.
- 816 Sadaie, Wakako, Yoshie Harada, and Michiyuki Matsuda. 2014. “Quantitative In Vivo Fluorescence  
817 Cross-Correlation Analyses Highlight the Importance of Competitive Effects in the Regulation of”  
818 34 (17): 3272–90.
- 819 Shcherbakova, Daria M., Mikhail Baloban, Alexander V. Emelyanov, Michael Brenowitz, Peng Guo,  
820 and Vladislav V. Verkhusha. 2016. “Bright Monomeric near-Infrared Fluorescent Proteins as Tags  
821 and Biosensors for Multiscale Imaging.” *Nature Communications* 7 (August): 12405.
- 822 Shcherbakova, Daria M., Natasha Cox Cammer, Tsipora M. Huisman, Vladislav V. Verkhusha, and  
823 Louis Hodgson. 2018. “Direct Multiplex Imaging and Optogenetics of Rho GTPases Enabled by  
824 near-Infrared FRET.” *Nature Chemical Biology* 14 (6): 591–600.
- 825 Shcherbakova, Daria M., and Vladislav V. Verkhusha. 2013. “Near-Infrared Fluorescent Proteins for  
826 Multicolor in Vivo Imaging.” *Nature Methods* 10 (8): 751–54.
- 827 Shemetov, Anton A., Olena S. Oliinyk, and Vladislav V. Verkhusha. 2017. “How to Increase  
828 Brightness of Near-Infrared Fluorescent Proteins in Mammalian Cells.” *Cell Chemical Biology* 24  
829 (6): 758–66.e3.
- 830 Shin, Ah-Young, Yun-Jeong Han, Pill-Soon Song, and Jeong-Il Kim. 2014. “Expression of  
831 Recombinant Full-Length Plant Phytochromes Assembled with Phytochromobilin in *Pichia*  
832 *Pastoris*.” *FEBS Letters* 588 (17): 2964–70.
- 833 Shi, Xianke, Hwee Foo Yong, Thankiah Sudhaharan, Shang Wei Chong, Vladimir Korzh, Sohail  
834 Ahmed, and Thorsten Wohland. 2009. “Determination of Dissociation Constants in Living  
835 Zebrafish Embryos with Single Wavelength Fluorescence Cross-Correlation Spectroscopy.”  
836 *Biophysical Journal* 97 (2): 678–86.
- 837 Siam, Rania, William P. Dolan, and Susan L. Forsburg. 2004. “Choosing and Using  
838 *Schizosaccharomyces Pombe* Plasmids.” *Methods* 33 (3): 189–98.
- 839 Stepanenko, Olesya V., Mikhail Baloban, Grigory S. Bublikov, Daria M. Shcherbakova, Olga V.  
840 Stepanenko, Konstantin K. Turoverov, Irina M. Kuznetsova, and Vladislav V. Verkhusha. 2016.  
841 “Allosteric Effects of Chromophore Interaction with Dimeric near-Infrared Fluorescent Proteins

- 842 Engineered from Bacterial Phytochromes.” *Scientific Reports* 6 (January): 18750.
- 843 Stepanenko, Olesya V., Olga V. Stepanenko, Olesya G. Shpironok, Alexander V. Fonin, Irina M.
- 844 Kuznetsova, and Konstantin K. Turoverov. 2019. “Near-Infrared Markers Based on Bacterial
- 845 Phytochromes with Phycocyanobilin as a Chromophore.” *International Journal of Molecular*
- 846 *Sciences* 20 (23). <https://doi.org/10.3390/ijms20236067>.
- 847 Sudhaharan, Thankiah, Ping Liu, Yong Hwee Foo, Wenyu Bu, Kim Buay Lim, Thorsten Wohland, and
- 848 Sohail Ahmed. 2009. “Determination of in Vivo Dissociation Constant, KD, of Cdc42-Effector
- 849 Complexes in Live Mammalian Cells Using Single Wavelength Fluorescence Cross-Correlation
- 850 Spectroscopy.” *The Journal of Biological Chemistry* 284 (20): 13602–9.
- 851 Suga, Minoru, and Toyomasa Hatakeyama. 2005. “A Rapid and Simple Procedure for High-Efficiency
- 852 Lithium Acetate Transformation of Cryopreserved *Schizosaccharomyces Pombe* Cells,” 799–804.
- 853 Terry, M. J., and J. C. Lagarias. 1991. “Holophytochrome Assembly. Coupled Assay for
- 854 Phytychromobilin Synthase in Organello.” *The Journal of Biological Chemistry* 266 (33): 22215–
- 855 21.
- 856 Terry, M. J., M. D. Maines, and J. C. Lagarias. 1993. “Inactivation of Phytochrome- and
- 857 Phycobiliprotein-Chromophore Precursors by Rat Liver Biliverdin Reductase.” *The Journal of*
- 858 *Biological Chemistry* 268 (35): 26099–106.
- 859 Tojima, Takuro, Yasuyuki Suda, Midori Ishii, Kazuo Kurokawa, and Akihiko Nakano. 2019.
- 860 “Spatiotemporal Dissection of the Trans-Golgi Network in Budding Yeast.” *Journal of Cell*
- 861 *Science* 132 (15). <https://doi.org/10.1242/jcs.231159>.
- 862 Tooley, Aaron J., Yuping A. Cai, and Alexander N. Glazer. 2001. “Biosynthesis of a Fluorescent
- 863 Cyanobacterial C-Phycocyanin Holo- $\alpha$  Subunit in a Heterologous Host.” *Proceedings of the*
- 864 *National Academy of Sciences of the United States of America* 98 (19): 10560–65.
- 865 Uda, Youichi, Yuhei Goto, Shigekazu Oda, Takayuki Kohchi, Michiyuki Matsuda, and Kazuhiro Aoki.
- 866 2017. “Efficient Synthesis of Phycocyanobilin in Mammalian Cells for Optogenetic Control of
- 867 Cell Signaling.” *Proceedings of the National Academy of Sciences of the United States of America*
- 868 114 (45): 11962–67.
- 869 Uda, Youichi, Haruko Miura, Yuhei Goto, Kei Yamamoto, Yusuke Mii, Yohei Kondo, Shinji Takada,
- 870 and Kazuhiro Aoki. 2020. “Improvement of Phycocyanobilin Synthesis for Genetically Encoded
- 871 Phytochrome-Based Optogenetics.” *ACS Chemical Biology*, November.
- 872 <https://doi.org/10.1021/acscchembio.0c00477>.
- 873 Vještica, Aleksandar, Magdalena Marek, Pedro Junior Nkosi, Laura Merlini, Gaowen Liu, Melvin
- 874 Bérard, Ingrid Billault-Chaumartin, and Sophie G. Martin. 2020. “A Toolbox of Stable Integration
- 875 Vectors in the Fission Yeast *Schizosaccharomyces Pombe*.” *Journal of Cell Science* 133 (1).
- 876 <https://doi.org/10.1242/jcs.240754>.
- 877 Wagner, Jeremiah R., Junrui Zhang, David von Stetten, Mina Günther, Daniel H. Murgida, Maria
- 878 Andrea Mroginski, Joseph M. Walker, Katrina T. Forest, Peter Hildebrandt, and Richard D.
- 879 Vierstra. 2008. “Mutational Analysis of *Deinococcus Radiodurans* Bacteriophytochrome Reveals
- 880 Key Amino Acids Necessary for the Photochromicity and Proton Exchange Cycle of
- 881 Phytochromes.” *The Journal of Biological Chemistry* 283 (18): 12212–26.
- 882 Wosika, Victoria, Eric Durandau, Clémence Varidel, Delphine Aymoz, Marta Schmitt, and Serge Pelet.
- 883 2016. “New Families of Single Integration Vectors and Gene Tagging Plasmids for Genetic
- 884 Manipulations in Budding Yeast.” *Molecular Genetics and Genomics: MGG* 291 (6): 2231–40.
- 885 Yu, Dan, Michelle A. Baird, John R. Allen, Elizabeth S. Howe, Matthew P. Klassen, Anna Reade,
- 886 Kalpana Makhijani, et al. 2015. “A Naturally Monomeric Infrared Fluorescent Protein for Protein
- 887 Labeling in Vivo.” *Nature Methods* 12 (8): 763–65.
- 888 Yu, Dan, William Clay Gustafson, Chun Han, Céline Lafaye, Marjolaine Noirclerc-Savoie, Woo-Ping

889 Ge, Desiree A. Thayer, et al. 2014. “An Improved Monomeric Infrared Fluorescent Protein for  
890 Neuronal and Tumour Brain Imaging.” *Nature Communications* 5 (May): 3626.

891
