# Supplementary material for: Near-infrared imaging in fission yeast by genetically encoded biosynthesis of phycocyanobilin
Source: bioRxiv or medRxiv preprint supplement (doi:10.1101/2021.05.19.444883), 2021-08-10
Supplement: Supplementary file [file media-1.pdf]

1 **Supplementary Information**

2

3 **Title:**

4 **Near-infrared imaging in fission yeast by genetically encoded biosynthesis of phycocyanobilin**

5

6 **Running Title:**

7 **iRFP imaging in fission yeast**

8

9 **Authors:**

10 Keiichiro Sakai,<sup>1,2,3</sup> Yohei Kondo,<sup>1,2,3</sup> Hiroyoshi Fujioka,<sup>4</sup> Mako Kamiya,<sup>5</sup> Kazuhiro Aoki,<sup>1,2,3,\*</sup>, and  
11 Yuhei Goto,<sup>1,2,3,6\*</sup>

12

13 **Affiliations:**

14 <sup>1</sup>Quantitative Biology Research Group, Exploratory Research Center on Life and Living Systems  
15 (ExCELLS), National Institutes of Natural Sciences, 5-1 Higashiyama, Myodaiji-cho, Okazaki, Aichi  
16 444-8787, Japan.

17 <sup>2</sup>Division of Quantitative Biology, National Institute for Basic Biology, National Institutes of Natural  
18 Sciences, 5-1 Higashiyama, Myodaiji-cho, Okazaki, Aichi 444-8787, Japan.

19 <sup>3</sup>Department of Basic Biology, School of Life Science, SOKENDAI (The Graduate University for  
20 Advanced Studies), 5-1 Higashiyama, Myodaiji-cho, Okazaki, Aichi 444-8787, Japan.

21 <sup>4</sup>Graduate School of Pharmaceutical Sciences, The University of Tokyo, 7-3-1 Hongo, Bunkyo-ku,  
22 Tokyo 113-0033, Japan.

23 <sup>5</sup>Graduate School of Medicine, The University of Tokyo, 7-3-1 Hongo, Bunkyo-ku, Tokyo 113-0033,  
24 Japan

25 <sup>6</sup>Lead contact

26 \*Corresponding authors

27 \*Correspondence: k-aoki@nibb.ac.jp and y-goto@nibb.ac.jp

28

29 **Supplementary Figures**

30

31

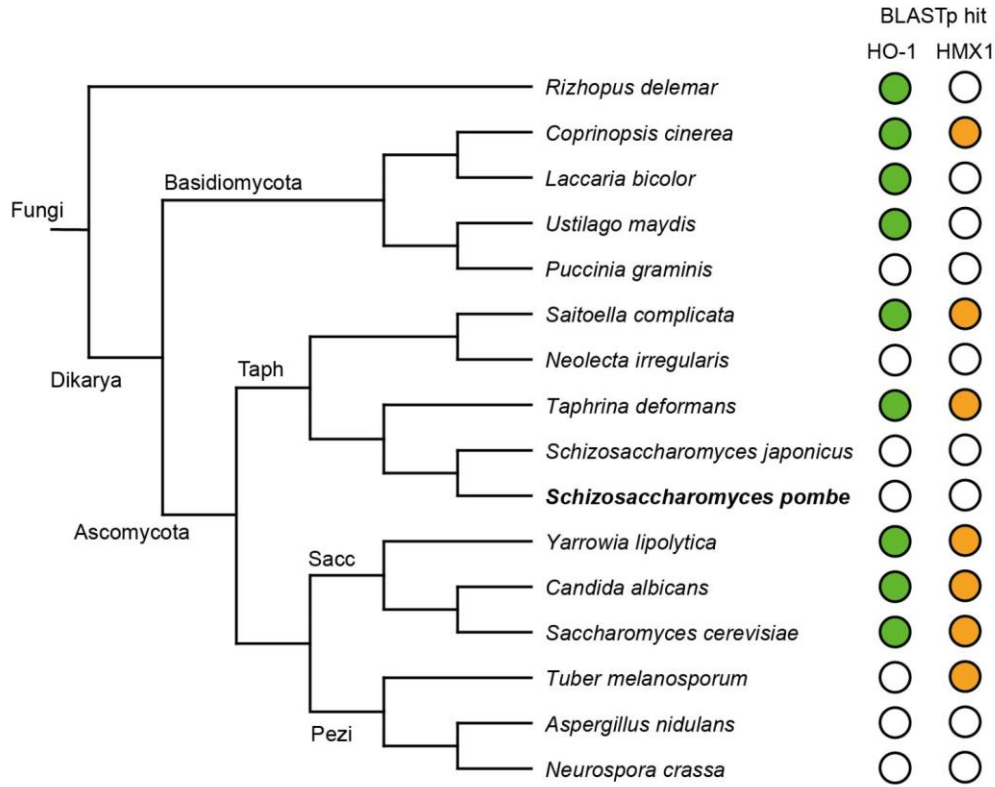

32

33 **Fig. S1. Phylogenetic distribution of HO-like sequences in fungal species**

34 Search results for heme oxygenase (HO)-like protein sequences in representative fungal species. Taph,  
 35 Taphrinomycotina. Sacc, Saccharomycotina. Pezi, Pezizomycotina. The green circles indicate hits by  
 36 BLASTp (e-value < 1e-5) with human HO1 as the query. The orange circles came from the same  
 37 procedure except that *S.cerevisiae* HMX1 was the query.

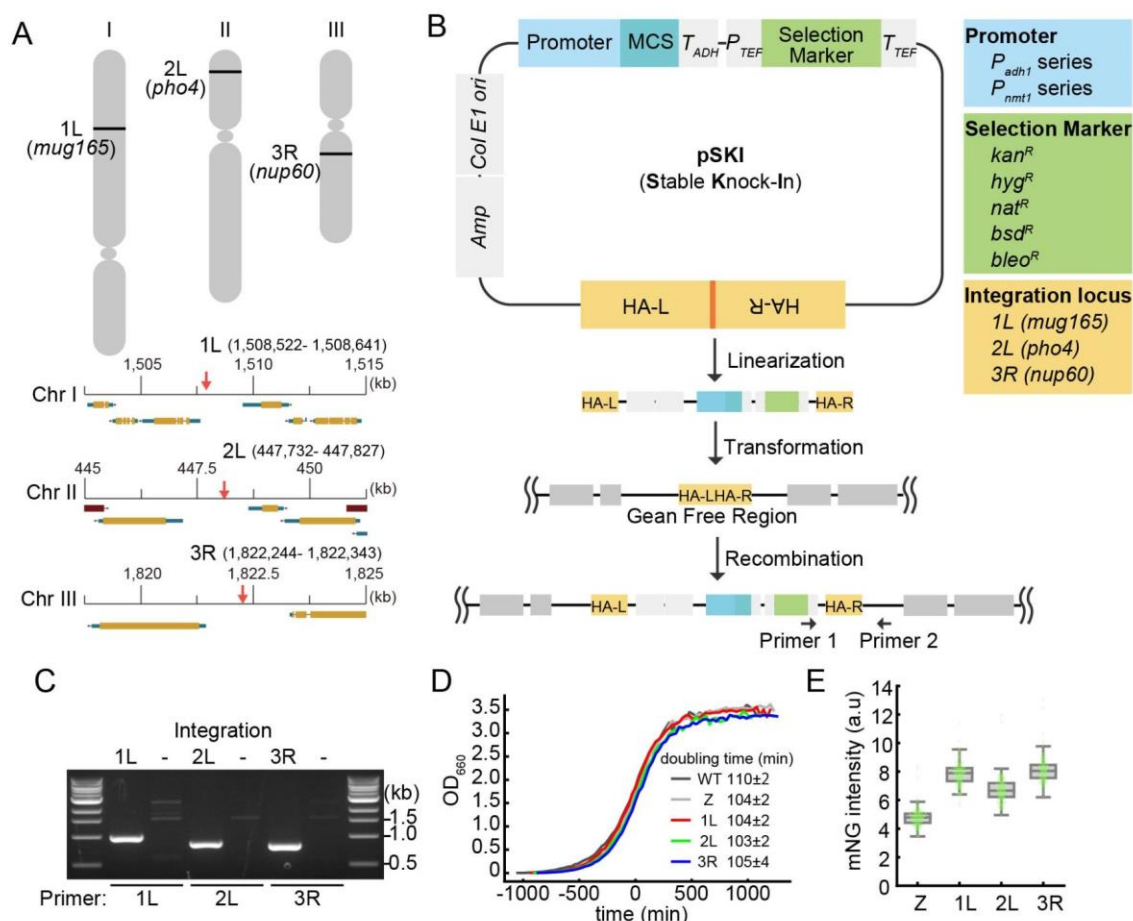

39

40

### Fig. S2. Novel chromosome integration plasmids, pSKI, for *Schizosaccharomyces pombe*.

41

(A) Integration loci at the gene-free region of each chromosome (upper) and gene locations around

42

integration loci (lower). Red arrows indicate the integration sites of each chromosome. (B) Plasmid

43

map and integration procedure. The homology arm left and right (HA-L and HA-R) are connected with

44

restriction enzyme recognition sites for linearization. Following linearization of the plasmid, DNA is

45

introduced into the fission yeast cells by standard transformation procedures. Transformed DNA is

46

integrated into the gene-free region through homologous recombination. The plasmid list is shown in

47

Table S1. (C) Verification of the integration into each locus by PCR using primers 1 and 2 as indicated

48

in panel B. Primer 1, which binds to the  $T_{TEF}$  region, is common to all three loci (1L, 2L, and 3R),

49

while primer 2, which binds to the outside of HA-R, is specific to each locus. (D) Representative

50

growth curve of strains integrated with empty vectors of each locus. Mean doubling times are shown

51

with the S.D. ( $n = 3$ , independent experiments). The calculation of the doubling time is described in the

52

Materials and Methods. (E) Comparison of protein expression levels among 1L, 2L, 3R, and Z loci.

53

mNeonGreen (mNG) was expressed from the indicated integration loci, and fluorescence intensity was

54

quantified. Each dot represents the mNG fluorescence of a single cell with a boxplot, in which the

55

box shows the quartiles of data with the whiskers denoting the minimum and maximum except for the

56

outliers detected by 1.5 times the interquartile range ( $n > 150$  cells).

57  
58  
59

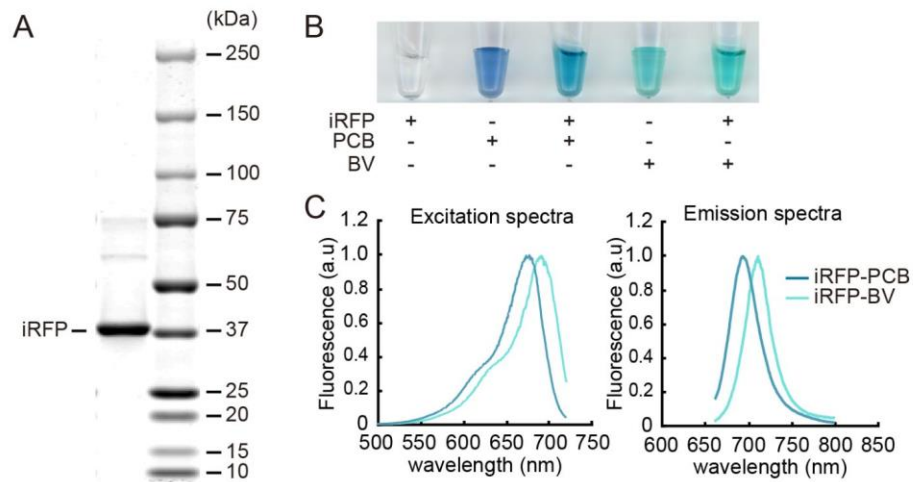

60

61 **Fig. S3. PCB binds to iRFP *in vitro***

62 (A) A representative image of CBB staining of purified recombinant His-iRFP (39 kDa). (B) A  
63 photograph of the purified His-iRFP, free PCB, PCB-bound His-iRFP, free BV, and BV-bound His-  
64 iRFP. Of note, unbound BV or PCB was eluted during the process of the size exclusion  
65 chromatography. (C) Excitation (left) and emission (right) spectra of His-iRFP bound to BV or PCB.  
66 The fluorescence intensities are normalized by the peak intensities.

67  
68  
69  
70  
71  
72  
73

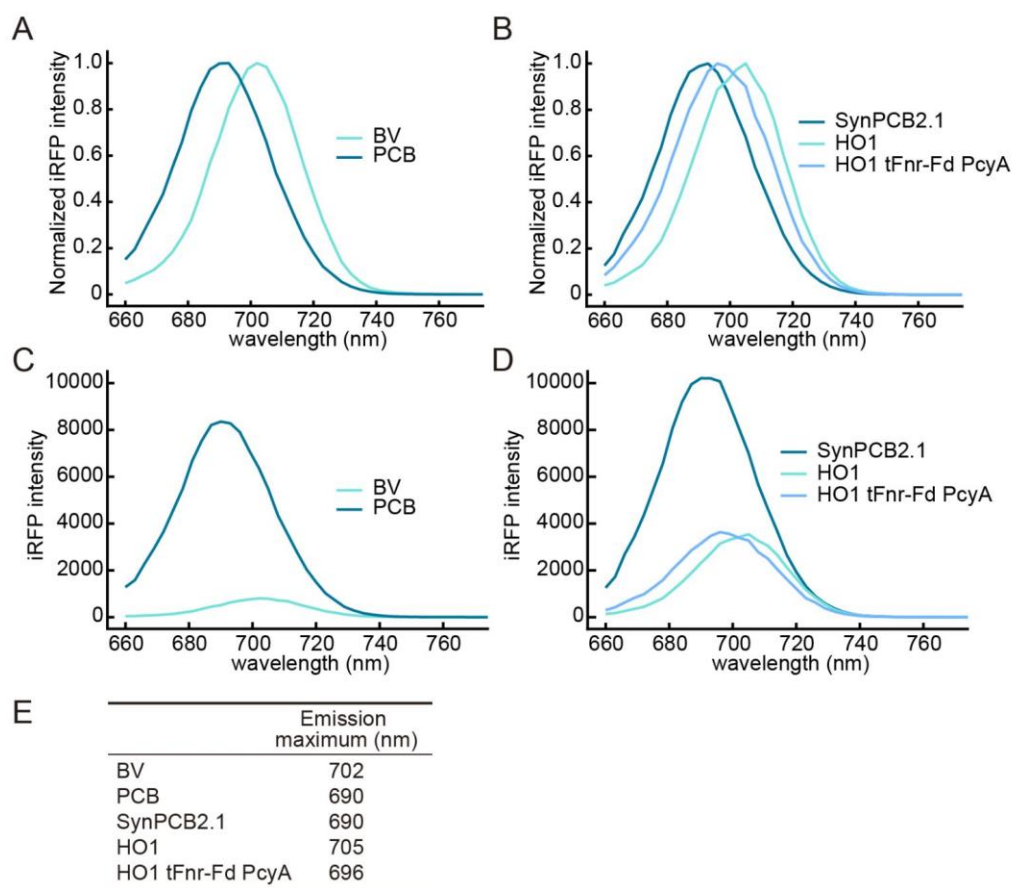77 **Fig. S4. Emission spectra of iRFP-BV or iRFP-PCB *in vivo***

78 (A) Normalized emission spectra of iRFP-BV and iRFP-PCB in fission yeast cells expressing NLS-  
 79 iRFP-NLS treated with BV (125  $\mu$ M) and PCB (125  $\mu$ M), respectively. Fission yeast cells were excited  
 80 by a 640 nm laser light source, and emission was measured every 3 nm with a 20 nm window. The  
 81 fluorescence intensity at each window was averaged from over 10 cells. The fluorescence intensities  
 82 were divided by the peak intensity for the normalization. (B) Normalized emission spectra of fission  
 83 yeast cells expressing SynPCB2.1, HO1, or three genes (HO1, tFnr-Fd, and PcyA). (C and D) Raw  
 84 emission spectra of panel A (C) and panel B (D). (E) Summary table of emission peaks *in vivo*.

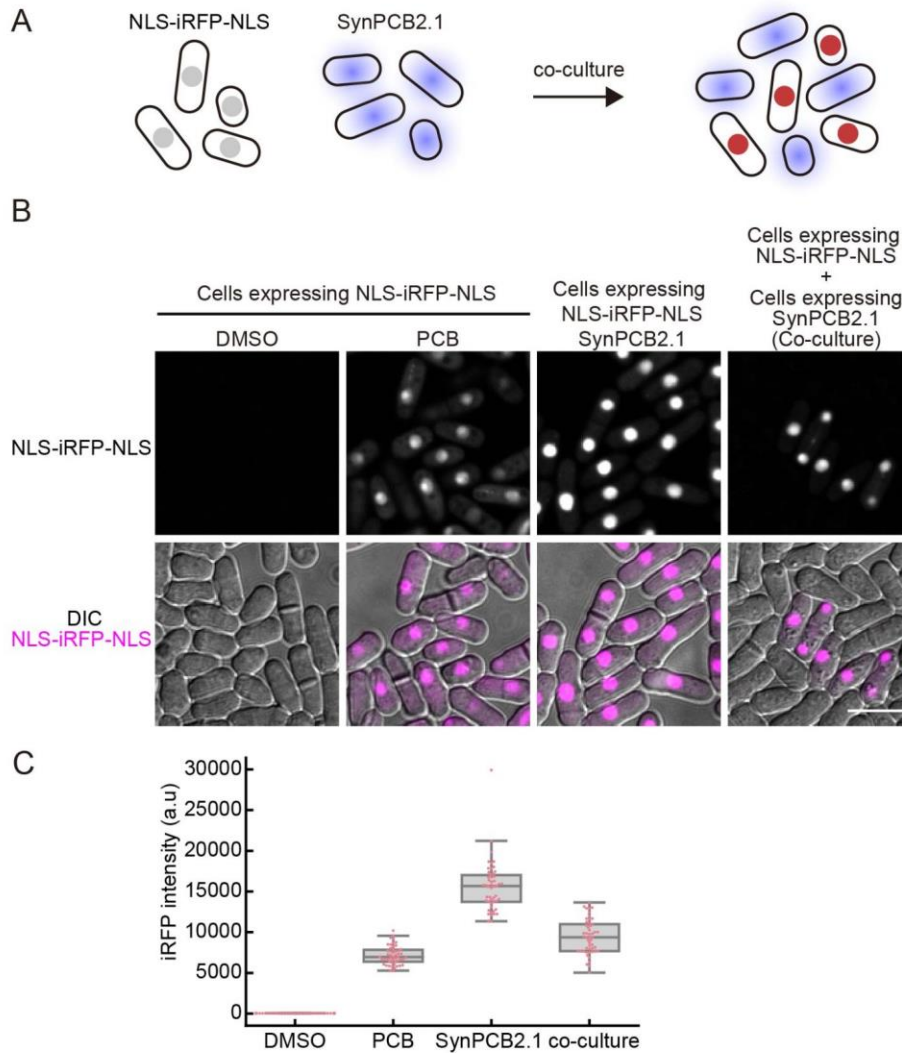

85  
86

87 **Fig. S5. PCB is leaked from fission yeast cells expressing SynPCB2.1.**

88 (A) Schematic illustration of the co-culture experiment. Neither cells expressing only SynPCB2.1 nor  
89 cells expressing only NLS-iRFP-NLS exhibit iRFP fluorescence. NLS-iRFP-NLS exhibits iRFP  
90 fluorescence when the two cell lines are co-cultured due to the leaking of PCB from cells into the  
91 culture media. (B) Representative images of cells expressing NLS-iRFP-NLS treated with DMSO (first  
92 column), PCB (125  $\mu$ M, second column), co-expression of SynPCB2.1 (third column), and co-culture  
93 with cells expressing SynPCB2.1 (fourth column). Scale bar, 10  $\mu$ m. (C) Quantification of NLS-iRFP-  
94 NLS signal intensity in panel B. Single-cell fluorescence intensities are shown by dots with boxplots, in  
95 which the box shows the quartiles of data with the whiskers denoting the minimum and maximum  
96 except for the outliers detected by 1.5 times the interquartile range (n = 50 cells).

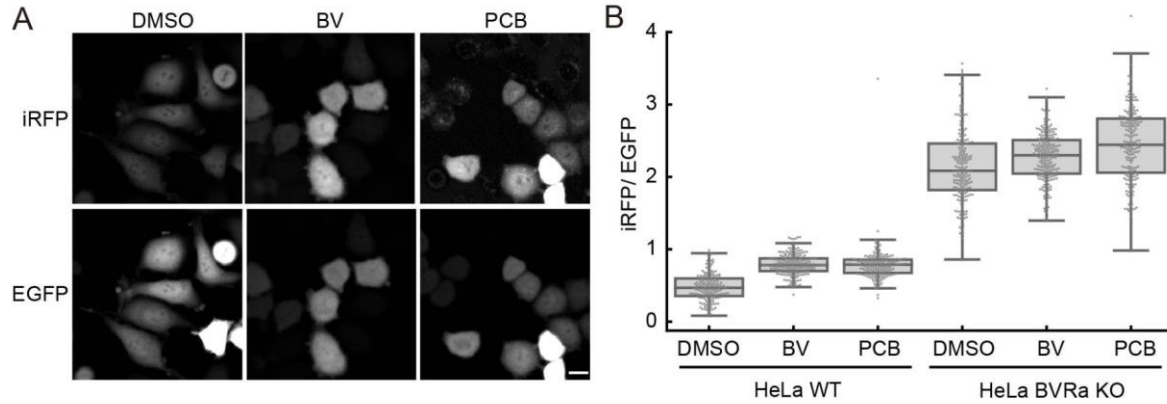

98

99 **Fig. S6. iRFP fluorescence in mammalian cells treated with PCB or BV**

100 (A) Representative images of parental HeLa cells expressing iRFP-P2A-EGFP treated with DMSO, BV  
 101 (25  $\mu$ M), or PCB (25  $\mu$ M). Scale bar, 10  $\mu$ m. (B) Quantification of iRFP/EGFP values in HeLa cells  
 102 and HeLa/BVRA KO cells under the indicated conditions. Each dot represents a data point from a  
 103 single cell with a boxplot, in which the box shows the quartiles of data with the whiskers denoting the  
 104 minimum and maximum except for the outliers detected by 1.5 times the interquartile range (n > 170  
 105 cells).

**Table S1. Plasmid list**

| <b>Plasmid name</b> | <b>Description</b> | <b>Source</b> | <b>Benchling Link</b>                                                                                             |
|---------------------|--------------------|---------------|-------------------------------------------------------------------------------------------------------------------|
| pSKI-KAN-1L-A1-M    | pSKI               | this study    | <a href="https://benchling.com/s/seq-G3P9JqxX51ObX5Sz96MA">https://benchling.com/s/seq-G3P9JqxX51ObX5Sz96MA</a>   |
| pSKI-NAT-1L-A1-M    | pSKI               | this study    | <a href="https://benchling.com/s/seq-8eBCjMRKikhCkkluJGhWW">https://benchling.com/s/seq-8eBCjMRKikhCkkluJGhWW</a> |
| pSKI-BSD-1L-A1-M    | pSKI               | this study    | <a href="https://benchling.com/s/seq-HhBJcOmn70PBjUtaRdFR">https://benchling.com/s/seq-HhBJcOmn70PBjUtaRdFR</a>   |
| pSKI-BLE-1L-A1-M    | pSKI               | this study    | <a href="https://benchling.com/s/seq-bhdt76l7rpG8s7St32bv">https://benchling.com/s/seq-bhdt76l7rpG8s7St32bv</a>   |
| pSKI-KAN-2L-A1-M    | pSKI               | this study    | <a href="https://benchling.com/s/seq-TreXp3COB6wHS3IOhASP">https://benchling.com/s/seq-TreXp3COB6wHS3IOhASP</a>   |
| pSKI-NAT-2L-A1-M    | pSKI               | this study    | <a href="https://benchling.com/s/seq-HLDrXgZxwWWQzFpCQmxk">https://benchling.com/s/seq-HLDrXgZxwWWQzFpCQmxk</a>   |
| pSKI-BSD-2L-A1-M    | pSKI               | this study    | <a href="https://benchling.com/s/seq-eDFPR3eDDbwOpHn3wELo">https://benchling.com/s/seq-eDFPR3eDDbwOpHn3wELo</a>   |
| pSKI-BLE-2L-A1-M    | pSKI               | this study    | <a href="https://benchling.com/s/seq-tU4cqJD4RsS3y9AFcgvD">https://benchling.com/s/seq-tU4cqJD4RsS3y9AFcgvD</a>   |
| pSKI-KAN-3R-A1-M    | pSKI               | this study    | <a href="https://benchling.com/s/seq-QLwzrxGXyx0TpSjNMzAH">https://benchling.com/s/seq-QLwzrxGXyx0TpSjNMzAH</a>   |
| pSKI-NAT-3R-A1-M    | pSKI               | this study    | <a href="https://benchling.com/s/seq-Hvove4y6Rfz9HRKKXmM8Q">https://benchling.com/s/seq-Hvove4y6Rfz9HRKKXmM8Q</a> |
| pSKI-HYG-3R-A1-M    | pSKI               | this study    | <a href="https://benchling.com/s/seq-EkO6jh5uMmuXF5brQFBq">https://benchling.com/s/seq-EkO6jh5uMmuXF5brQFBq</a>   |
| pSKI-BSD-3R-A1-M    | pSKI               | this study    | <a href="https://benchling.com/s/seq-NUrSW450XbywsQzxnyX9">https://benchling.com/s/seq-NUrSW450XbywsQzxnyX9</a>   |
| pSKI-BLE-3R-A1-M    | pSKI               | this study    | <a href="https://benchling.com/s/seq-G4LydqOGtHxT2v7SHikY">https://benchling.com/s/seq-G4LydqOGtHxT2v7SHikY</a>   |
| pSKI-KAN-1L-N1      | pSKI               | this study    | <a href="https://benchling.com/s/seq-lajqCWRwNsuhe2ckb9nk">https://benchling.com/s/seq-lajqCWRwNsuhe2ckb9nk</a>   |
| pSKI-NAT-1L-N1      | pSKI               | this study    | <a href="https://benchling.com/s/seq-X1w13cdTQVw4wgGpBfZR">https://benchling.com/s/seq-X1w13cdTQVw4wgGpBfZR</a>   |
| pSKI-BSD-1L-N1      | pSKI               | this study    | <a href="https://benchling.com/s/seq-QOZRlvatv7zHfuA7bMnI">https://benchling.com/s/seq-QOZRlvatv7zHfuA7bMnI</a>   |
| pSKI-BLE-1L-N1      | pSKI               | this study    | <a href="https://benchling.com/s/seq-MfQgtyoBCoIVSDIujzig">https://benchling.com/s/seq-MfQgtyoBCoIVSDIujzig</a>   |
| pSKI-KAN-2L-N1      | pSKI               | this study    | <a href="https://benchling.com/s/seq-CFloX6NrLvujrn15JaPD">https://benchling.com/s/seq-CFloX6NrLvujrn15JaPD</a>   |
| pSKI-NAT-2L-N1      | pSKI               | this study    | <a href="https://benchling.com/s/seq-YbDO5EX4oqDfJguRrf0">https://benchling.com/s/seq-YbDO5EX4oqDfJguRrf0</a>     |
| pSKI-HYG-2L-N1      | pSKI               | this study    | <a href="https://benchling.com/s/seq-8e48M8moxUXOqsybHbYO">https://benchling.com/s/seq-8e48M8moxUXOqsybHbYO</a>   |
| pSKI-BSD-2L-N1      | pSKI               | this study    | <a href="https://benchling.com/s/seq-a5dfK1ki5ow43Px6o0tl">https://benchling.com/s/seq-a5dfK1ki5ow43Px6o0tl</a>   |
| pSKI-BLE-2L-N1      | pSKI               | this study    | <a href="https://benchling.com/s/seq-KocnJoOdrJwaDPHHGeke">https://benchling.com/s/seq-KocnJoOdrJwaDPHHGeke</a>   |



|                                                           |                             |            |                                                                                                                   |
|-----------------------------------------------------------|-----------------------------|------------|-------------------------------------------------------------------------------------------------------------------|
| pSKI-KAN-3R-N1                                            | pSKI                        | this study | <a href="https://benchling.com/s/seq-BZmnME31WCynpEwW7GfH">https://benchling.com/s/seq-BZmnME31WCynpEwW7GfH</a>   |
| pSKI-NAT-3R-N1                                            | pSKI                        | this study | <a href="https://benchling.com/s/seq-kVuyYx3nHglfwjYIOMYPP">https://benchling.com/s/seq-kVuyYx3nHglfwjYIOMYPP</a> |
| pSKI-BSD-3R-N1                                            | pSKI                        | this study | <a href="https://benchling.com/s/seq-7M97ws9s2eY5ZfqXIQBq">https://benchling.com/s/seq-7M97ws9s2eY5ZfqXIQBq</a>   |
| pSKI-HYG-3R-N1                                            | pSKI                        | this study | <a href="https://benchling.com/s/seq-1eL7D3ki8KLvb3Uh3etM">https://benchling.com/s/seq-1eL7D3ki8KLvb3Uh3etM</a>   |
| pSKI-BLE-3R-N1                                            | pSKI                        | this study | <a href="https://benchling.com/s/seq-kMwFYBeWLuaYDoegFvdl">https://benchling.com/s/seq-kMwFYBeWLuaYDoegFvdl</a>   |
| pFA6a-iRFP-kan                                            | iRFP C-terminal tagging     | this study | <a href="https://benchling.com/s/seq-bkYIYdFOOLISWLRgqKf2">https://benchling.com/s/seq-bkYIYdFOOLISWLRgqKf2</a>   |
| pFA6a-iRFP-hyg                                            | iRFP C-terminal tagging     | this study | <a href="https://benchling.com/s/seq-emc65aNbjBFYkdt8Ooib">https://benchling.com/s/seq-emc65aNbjBFYkdt8Ooib</a>   |
| pFA6a-iRFP-nat                                            | iRFP C-terminal tagging     | this study | <a href="https://benchling.com/s/seq-hb5KLMGZXpgTFmQN9MH5">https://benchling.com/s/seq-hb5KLMGZXpgTFmQN9MH5</a>   |
| pFA6a-iRFP-bsd                                            | iRFP C-terminal tagging     | this study | <a href="https://benchling.com/s/seq-MB0yvsIASTKHVYJnvflU">https://benchling.com/s/seq-MB0yvsIASTKHVYJnvflU</a>   |
| pFA6a-mNeonGreen (S.p codon optimized)-kan                | mNG C-terminal tagging      | this study | <a href="https://benchling.com/s/seq-r5vPvd2m4SeMm6VxVhiN">https://benchling.com/s/seq-r5vPvd2m4SeMm6VxVhiN</a>   |
| pSKI-KAN-1L-A1-M-SynPCB2.1                                | synPCB2.1                   | this study | <a href="https://benchling.com/s/seq-iAht1qGQ6taledZRBjhy">https://benchling.com/s/seq-iAht1qGQ6taledZRBjhy</a>   |
| pSKI-NAT-1L-A1-M-SynPCB2.2                                | synPCB2.1                   | this study | <a href="https://benchling.com/s/seq-6Ds1kIA3foLeFGMjNRY4">https://benchling.com/s/seq-6Ds1kIA3foLeFGMjNRY4</a>   |
| pSKI-BSD-1L-A1-M-SynPCB2.1                                | synPCB2.1                   | this study | <a href="https://benchling.com/s/seq-t5O2P2WzKmrnTYCcEtUk">https://benchling.com/s/seq-t5O2P2WzKmrnTYCcEtUk</a>   |
| pSKI-BLE-1L-A1-M-SynPCB2.1                                | synPCB2.1                   | this study | <a href="https://benchling.com/s/seq-TeeZbKcTCjCZxRoCQ9ua">https://benchling.com/s/seq-TeeZbKcTCjCZxRoCQ9ua</a>   |
| pSKI-BSD-1L-A1-M-SynPCB2.1-Lifeact-iRFP                   | pSKI-SynPCB2.1-Lifeact-iRFP | this study | <a href="https://benchling.com/s/seq-kazB0PhzppnUokAcnZBp">https://benchling.com/s/seq-kazB0PhzppnUokAcnZBp</a>   |
| pSKI-BSD-1L-A1-M-SynPCB2.1-Tadh1-Padh1-NLS-iRFP-NLS-Tadh1 | pSKI-SynPCB2.1-NLS-iRFP-NLS | this study | <a href="https://benchling.com/s/seq-gGVpZDolap5t4mj7bGFK">https://benchling.com/s/seq-gGVpZDolap5t4mj7bGFK</a>   |
| pSKI-BSD-2L-A1-M-NLS-iRFP-NLS                             |                             | this study | <a href="https://benchling.com/s/seq-obPOLIX96PllBreCKNXY">https://benchling.com/s/seq-obPOLIX96PllBreCKNXY</a>   |
| pSKI-NAT-1L-A1-M-MTS-HO1                                  |                             | this study | <a href="https://benchling.com/s/seq-A38a1P9LQU1mhRfdWPBb">https://benchling.com/s/seq-A38a1P9LQU1mhRfdWPBb</a>   |
| pSKI-NAT-3R-A1-M-MTS-btFnr-bFd                            |                             | this study | <a href="https://benchling.com/s/seq-6MjIWH76M7373w9WG02R">https://benchling.com/s/seq-6MjIWH76M7373w9WG02R</a>   |
| pMNATZA1-MTS-PcyA                                         |                             | this study | <a href="https://benchling.com/s/seq-sRCmN6qpFCs6Dp5yVqzO">https://benchling.com/s/seq-sRCmN6qpFCs6Dp5yVqzO</a>   |
| pSKI-KAN-1L-A1-M-MTS-HO1                                  |                             | this study | <a href="https://benchling.com/s/seq-U8xwbETwRXjlZmqHhQ2O">https://benchling.com/s/seq-U8xwbETwRXjlZmqHhQ2O</a>   |
| pSKI-KAN-3R-A1-M-MTS-btFnr-bFd                            |                             | this study | <a href="https://benchling.com/s/seq-SuqW1exP3iAJHvnDvxed">https://benchling.com/s/seq-SuqW1exP3iAJHvnDvxed</a>   |
| pMNATZA1                                                  |                             | this study | <a href="https://benchling.com/s/seq-F7zeXNTMu66Gs0zKvIpx">https://benchling.com/s/seq-F7zeXNTMu66Gs0zKvIpx</a>   |

|                                                     |  |            |                                                                                                                 |
|-----------------------------------------------------|--|------------|-----------------------------------------------------------------------------------------------------------------|
| pMNATZA1-spmNeonGreen                               |  | this study | <a href="https://benchling.com/s/seq-eNXfcf6oImjRKuJpX9k5">https://benchling.com/s/seq-eNXfcf6oImjRKuJpX9k5</a> |
| pSKI-NAT-1L-A1-M-spmNeonGreen (S.p codon optimized) |  | this study | <a href="https://benchling.com/s/seq-5RTHLQjGhwtHW5hpF9XC">https://benchling.com/s/seq-5RTHLQjGhwtHW5hpF9XC</a> |
| pSKI-NAT-2L-A1-M-spmNeonGreen (S.p codon optimized) |  | this study | <a href="https://benchling.com/s/seq-5KTJy6ykRRzXgNaRUUeV">https://benchling.com/s/seq-5KTJy6ykRRzXgNaRUUeV</a> |
| pSKI-NAT-3R-A1-M-spmNeonGreen (S.p codon optimized) |  | this study | <a href="https://benchling.com/s/seq-8eBCjMRKikhCkklujGhW">https://benchling.com/s/seq-8eBCjMRKikhCkklujGhW</a> |
| pNATZA15-mCherry-atb2                               |  | this study | <a href="https://benchling.com/s/seq-0XMOLayGLNMT0Jx5xFa8">https://benchling.com/s/seq-0XMOLayGLNMT0Jx5xFa8</a> |
| pHBCA11-NLS-mTagBFP2-NLS                            |  | this study | <a href="https://benchling.com/s/seq-vsO72fejJfzTcSFPqF5X">https://benchling.com/s/seq-vsO72fejJfzTcSFPqF5X</a> |
| pMBLE-3R-A1-Turquoise2-GL-ras1delN200               |  | This study | <a href="https://benchling.com/s/seq-KXyKpjnMwc3D1kstue68">https://benchling.com/s/seq-KXyKpjnMwc3D1kstue68</a> |
| pCold-TEV-iRFP713                                   |  | this study | <a href="https://benchling.com/s/seq-2HCLXjM6wnXr2mMIa5QH">https://benchling.com/s/seq-2HCLXjM6wnXr2mMIa5QH</a> |
| pCAGGS-iRFP-P2A-EGFP                                |  | this study | <a href="https://benchling.com/s/seq-CwGlEm2qwVg6M8Cq2fVL">https://benchling.com/s/seq-CwGlEm2qwVg6M8Cq2fVL</a> |

**Table S2. *Schizosaccharomyces pombe* strain list**

| Strain name | Genotype                                                                                      | Fig.                                                                            | Source                    |
|-------------|-----------------------------------------------------------------------------------------------|---------------------------------------------------------------------------------|---------------------------|
| L972        | h-                                                                                            | Fig. 2C, 2D, Fig. S2C, S2D                                                      | NBRP                      |
| L975        | h+                                                                                            |                                                                                 | NBRP                      |
| SK276       | h- 2L::Padh1-NLS-iRFP-NLS<<bsd                                                                | Fig. 1B, 1C, 1D, Fig. 2B, 2C, 2D, Fig. 3B, 3C, 3G, Fig. S4A, S4C, Fig. S5B, S5C | this study, L972          |
| SK277       | h+ 2L::Padh1-NLS-iRFP-NLS<<bsd                                                                |                                                                                 | this study, L975          |
| SK284       | h- 2L::Padh1-NLS-iRFP-NLS<<bsd 1L::Padh1-HO1<<nat                                             | Fig. 2B, Fig. 3B, 3C, 3G, Fig. S4B, S4D                                         | this study, SK276         |
| SK285       | h+ 2L::Padh1-NLS-iRFP-NLS<<bsd 3R::Padh1-btFnr-bFd<<nat                                       | Fig. 2B                                                                         | this study, SK277         |
| SK287       | h+ 2L::Padh1-NLS-iRFP-NLS<<bsd z::Padh1-PcyA<<nat                                             | Fig. 2B                                                                         | this study, SK277         |
| SK294       | h- 2L::Padh1-NLS-iRFP-NLS<<bsd 1L::Padh1-HO1<<nat 3R::Padh1-btFnr-bFd<<kan                    | Fig. 2B                                                                         | this study, SK284         |
| SK296       | h+ 2L::Padh1-NLS-iRFP-NLS<<bsd z::Padh1-PcyA<<nat 1L::Padh1-HO1<<kan                          | Fig. 2B                                                                         | this study, SK287         |
| SK295       | h+ 2L::Padh1-NLS-iRFP-NLS<<bsd z::Padh1-PcyA<<nat 3R::Padh1-btFnr-bFd<<kan                    | Fig. 2B                                                                         | this study, SK287         |
| SK305       | h+ 2L::Padh1-NLS-iRFP-NLS<<bsd 1L::Padh1-HO1<<nat 3R::Padh1-btFnr-bFd<<kan z::Padh1-PcyA<<nat | Fig. 2B, Fig. 3G, Fig. S4B, S4D                                                 | this study, SK294 x SK295 |
| SK282       | h- 2L::Padh1-NLS-iRFP-NLS<<bsd 1L::Padh1-SynPCB2.1<<kan                                       | Fig. 3G, Fig. S4B, S4D, Fig. S5B, S5C                                           | this study, SK276         |
| YG658       | h- 1L::Padh1-SynPCB2.1<<bsd                                                                   |                                                                                 | this study, L972          |
| YG1074      | h- 1L::Padh1-SynPCB2.1<<bsd cdc2-iRFP<<kan                                                    | Fig. 4B                                                                         | this study, YG658         |
| YG1096      | h- 1L::Padh1-SynPCB2.1<<bsd rpb9-iRFP<<kan                                                    | Fig. 4B                                                                         | this study, YG658         |
| YG1095      | h- 1L::Padh1-SynPCB2.1<<bsd rpa49-iRFP<<kan                                                   | Fig. 4B                                                                         | this study, YG658         |
| YG1085      | h- 1L::Padh1-SynPCB2.1<<bsd swi6-iRFP<<kan                                                    | Fig. 4B                                                                         | this study, YG658         |
| YG1093      | h- 1L::Padh1-SynPCB2.1<<bsd pds5-iRFP<<kan                                                    | Fig. 4B                                                                         | this study, YG658         |
| YG1083      | h- 1L::Padh1-SynPCB2.1<<bsd cut11-iRFP<<kan                                                   | Fig. 4B                                                                         | this study, YG658         |
| YG1094      | h- 1L::Padh1-SynPCB2.1<<bsd mal3-iRFP<<kan                                                    | Fig. 4B                                                                         | this study, YG658         |
| YG1084      | h- 1L::Padh1-SynPCB2.1<<bsd sfi1-iRFP<<kan                                                    | Fig. 4B                                                                         | this study, YG658         |

|        |                                                                                                                                                                       |               |                    |
|--------|-----------------------------------------------------------------------------------------------------------------------------------------------------------------------|---------------|--------------------|
| YG1086 | h- 1L::Padh1-SynPCB2.1<<bsd cox4-iRFP<<kan                                                                                                                            | Fig. 4B       | this study, YG658  |
| YG1092 | h- 1L::Padh1-SynPCB2.1<<bsd cnx1-iRFP<<kan                                                                                                                            | Fig. 4B       | this study, YG658  |
| SK323  | h- 1L::Padh1-SynPCB2.1-Lifeact-iRFP<<bsd                                                                                                                              | Fig. 5A       | this study, L972   |
| YG1082 | h- 1L::Padh1-synPCB2.1-Tadh1-Padh1-NLS-iRFP-NLS-Tadh1<<bsd                                                                                                            | Fig. 5B       | this study, L972   |
| SK356  | h- 3R::Padh1-spnTurquoise2-GL-ras1delN200<<ble                                                                                                                        |               | this study, L972   |
| YG1114 | h- 3R::Padh1-spnTurquoise2-GL-ras1delN200<<ble mis12-spmNeonGreen<<kan 1L::Padh1-synPCB2.1-Lifeact-iRFP<<bsd                                                          |               | this study, SK356  |
| YG1124 | h- 3R::Padh1-spnTurquoise2-GL-ras1delN200<<ble mis12-spmNeonGreen<<kan 1L::Padh1-synPCB2.1-Lifeact-iRFP<<bsd z::Padh15-mCherry-atb2<<nat                              |               | this study, YG1114 |
| YG1127 | h- 3R::Padh1-Turquoise2-GL-ras1delN200<<ble mis12-spmNeonGreen<<kan 1L::Padh1-synPCB2.1-Lifeact-iRFP<<bsd z::Padh15-mCherry-atb2<<nat c::Padh11-NLS-mTagBFP2-NLS<<hyg | Fig. 5C       | this study, YG1124 |
| SK064  | h- 1L::Padh1<<nat                                                                                                                                                     | Fig. S2C, S2D | this study, L972   |
| SK098  | h- 2L::Padh1<<nat                                                                                                                                                     | Fig. S2C, S2D | this study, L972   |
| SK100  | h- 3R::Padh1<<nat                                                                                                                                                     | Fig. S2C, S2D | this study, L972   |
| SK062  | h- z::Padh1<<nat                                                                                                                                                      | Fig. S2D      | this study, L972   |
| SK063  | h- z::Padh1-spmNeonGreen<<nat                                                                                                                                         | Fig. S2E      | this study, L972   |
| SK027  | h- 1L::Padh1-spmNeonGreen<<nat                                                                                                                                        | Fig. S2E      | this study, L972   |
| SK099  | h- 2L::Padh1-spmNeonGreen<<nat                                                                                                                                        | Fig. S2E      | this study, L972   |
| SK101  | h- 3R::Padh1-spmNeonGreen<<nat                                                                                                                                        | Fig. S2E      | this study, L972   |
| YG503  | h- 1L::Padh1-SynPCB2.1<<kan                                                                                                                                           | Fig. S5B, S5C | this study, L972   |

111 **Table S3. Primer list**

| <b>Primer name</b> | <b>Primer sequence (5' → 3')</b> |
|--------------------|----------------------------------|
| TefF               | ATGCGAAGTTAAGTGCGCAG             |
| 1Llocus-check-R    | TCGGATAGTAGTTGCCAACAGC           |
| 2Llocus-check-R    | CGTATTTGCTGTACATAGCATAATTC       |
| 3Rlocus-check-R    | TGCAGCTGTAGTAAATTCGAAGTC         |

112

**Table S4. Genome information and BLASTp results**

| Species                                                               | BLASTp e-value (HO-1) | BLASTp e-value (HMX1) | Accession No.   | Reference                |
|-----------------------------------------------------------------------|-----------------------|-----------------------|-----------------|--------------------------|
| <i>Rhizopus delemar</i> RA 99-880                                     | 5.19E-53              |                       | GCA_000149305.1 | (Ma et al., 2009)        |
| <i>Coprinopsis cinerea</i> Okayama-7                                  | 1.89E-31              | 2.89E-07              | GCA_000182895.1 | (Stajich et al., 2010)   |
| <i>Laccaria bicolor</i> S238N-H82                                     | 1.51E-30              |                       | GCA_000143565.1 | (Martin et al., 2008)    |
| <i>Ustilago maydis</i> strain 521                                     | 5.92E-15              |                       | GCA_000328475.2 | (Kämper et al., 2006)    |
| <i>Puccinia graminis</i> f. sp. <i>tritici</i> strain CRL 75-36-700-3 |                       |                       | GCA_000149925.1 | (Duplessis et al., 2011) |
| <i>Saitoella complicata</i> NRRL Y-17804                              | 5.58E-13              | 1.03E-27              | GCA_001661265.1 | (Riley et al., 2016)     |
| <i>Neoelecta irregularis</i> DAH-3                                    |                       |                       | GCA_001929475.1 | (Nguyen et al., 2017)    |
| <i>Taphrina deformans</i> PYCC 5710                                   | 4.16E-08              | 9.95E-24              | GCA_000312925.2 | (Cissé et al., 2013)     |
| <i>Schizosaccharomyces japonicus</i> yFS275                           |                       |                       | GCA_000149845.2 | (Rhind et al., 2011)     |
| <i>Schizosaccharomyces pombe</i> L972                                 |                       |                       | GCA_000002945.2 | (Wood et al., 2002)      |
| <i>Yarrowia lipolytica</i>                                            | 6.73E-10              | 7.60E-63              | GCA_000002525.1 | (Dujon et al., 2004)     |
| <i>Candida albicans</i> WO-1                                          | 9.74E-12              | 8.36E-56              | GCA_000149445.2 | (Butler et al., 2009)    |
| <i>Saccharomyces cerevisiae</i> S288C                                 | 6.52E-09              | 0                     | GCA_000146045.2 | (Goffeau et al., 1996)   |
| <i>Tuber melanosporum</i> Mel28                                       |                       | 1.07E-22              | GCA_000151645.1 | (Martin et al., 2010)    |
| <i>Aspergillus nidulans</i> FGSC-A4                                   |                       |                       | GCA_000149205.2 | (Arnaud et al., 2012)    |
| <i>Neurospora crassa</i> OR74A                                        |                       |                       | GCA_000182925.2 | (Galagan et al., 2003)   |

115

116 **Supplementary Reference**

117 **Arnaud, M. B., Cerqueira, G. C., Inglis, D. O., Skrzypek, M. S., Binkley, J., Chibucos, M. C.,**  
118 **Crabtree, J., Howarth, C., Orvis, J., Shah, P., et al.** (2012). The Aspergillus Genome Database  
119 (AspGD): recent developments in comprehensive multispecies curation, comparative genomics  
120 and community resources. *Nucleic Acids Res.* **40**, D653–9.

121 **Butler, G., Rasmussen, M. D., Lin, M. F., Santos, M. A. S., Sakthikumar, S., Munro, C. A.,**  
122 **Rheinbay, E., Grabherr, M., Forche, A., Reedy, J. L., et al.** (2009). Evolution of pathogenicity  
123 and sexual reproduction in eight *Candida* genomes. *Nature* **459**, 657–662.

124 **Cissé, O. H., Almeida, J. M. G. C. F., Fonseca, A., Kumar, A. A., Salojärvi, J., Overmyer, K.,**  
125 **Hauser, P. M. and Pagni, M.** (2013). Genome sequencing of the plant pathogen *Taphrina*  
126 *deformans*, the causal agent of peach leaf curl. *MBio* **4**, e00055–13.

127 **Dujon, B., Sherman, D., Fischer, G., Durrens, P., Casaregola, S., Lafontaine, I., De Montigny, J.,**  
128 **Marck, C., Neuvéglise, C., Talla, E., et al.** (2004). Genome evolution in yeasts. *Nature* **430**, 35–  
129 44.

130 **Duplessis, S., Cuomo, C. A., Lin, Y.-C., Aerts, A., Tisserant, E., Veneault-Fourrey, C., Joly, D. L.,**  
131 **Hacquard, S., Amselem, J., Cantarel, B. L., et al.** (2011). Obligate biotrophy features unraveled  
132 by the genomic analysis of rust fungi. *Proc. Natl. Acad. Sci. U. S. A.* **108**, 9166–9171.

133 **Galagan, J. E., Calvo, S. E., Borkovich, K. A., Selker, E. U., Read, N. D., Jaffe, D., FitzHugh, W.,**  
134 **Ma, L.-J., Smirnov, S., Purcell, S., et al.** (2003). The genome sequence of the filamentous  
135 fungus *Neurospora crassa*. *Nature* **422**, 859–868.

136 **Goffeau, A., Barrell, B. G., Bussey, H., Davis, R. W., Dujon, B., Feldmann, H., Galibert, F.,**  
137 **Hoheisel, J. D., Jacq, C., Johnston, M., et al.** (1996). Life with 6000 genes. *Science* **274**, 546,  
138 563–7.

139 **Kämper, J., Kahmann, R., Bölker, M., Ma, L.-J., Brefort, T., Saville, B. J., Banuett, F., Kronstad,**  
140 **J. W., Gold, S. E., Müller, O., et al.** (2006). Insights from the genome of the biotrophic fungal  
141 plant pathogen *Ustilago maydis*. *Nature* **444**, 97–101.

142 **Ma, L.-J., Ibrahim, A. S., Skory, C., Grabherr, M. G., Burger, G., Butler, M., Elias, M., Idnurm,**  
143 **A., Lang, B. F., Sone, T., et al.** (2009). Genomic analysis of the basal lineage fungus *Rhizopus*  
144 *oryzae* reveals a whole-genome duplication. *PLoS Genet.* **5**, e1000549.

145 **Martin, F., Aerts, A., Ahrén, D., Brun, A., Danchin, E. G. J., Duchaussoy, F., Gibon, J., Kohler,**  
146 **A., Lindquist, E., Pereda, V., et al.** (2008). The genome of *Laccaria bicolor* provides insights  
147 into mycorrhizal symbiosis. *Nature* **452**, 88–92.

148 **Martin, F., Kohler, A., Murat, C., Balestrini, R., Coutinho, P. M., Jaillon, O., Montanini, B.,**  
149 **Morin, E., Noel, B., Percudani, R., et al.** (2010). Périgord black truffle genome uncovers  
150 evolutionary origins and mechanisms of symbiosis. *Nature* **464**, 1033–1038.

- 151 **Nguyen, T. A., Cissé, O. H., Yun Wong, J., Zheng, P., Hewitt, D., Nowrousian, M., Stajich, J. E.**  
152 **and Jedd, G.** (2017). Innovation and constraint leading to complex multicellularity in the  
153 Ascomycota. *Nat. Commun.* **8**, 14444.
- 154 **Rhind, N., Chen, Z., Yassour, M., Thompson, D. A., Haas, B. J., Habib, N., Wapinski, I., Roy, S.,**  
155 **Lin, M. F., Heiman, D. I., et al.** (2011). Comparative functional genomics of the fission yeasts.  
156 *Science* **332**, 930–936.
- 157 **Riley, R., Haridas, S., Wolfe, K. H., Lopes, M. R., Hittinger, C. T., Göker, M., Salamov, A. A.,**  
158 **Wisecaver, J. H., Long, T. M., Calvey, C. H., et al.** (2016). Comparative genomics of  
159 biotechnologically important yeasts. *Proc. Natl. Acad. Sci. U. S. A.* **113**, 9882–9887.
- 160 **Stajich, J. E., Wilke, S. K., Ahrén, D., Au, C. H., Birren, B. W., Borodovsky, M., Burns, C.,**  
161 **Canbäck, B., Casselton, L. A., Cheng, C. K., et al.** (2010). Insights into evolution of  
162 multicellular fungi from the assembled chromosomes of the mushroom *Coprinopsis cinerea*  
163 (*Coprinus cinereus*). *Proc. Natl. Acad. Sci. U. S. A.* **107**, 11889–11894.
- 164 **Vještica, A., Marek, M., Nkosi, P. J., Merlini, L., Liu, G., Bérard, M., Billault-Chaumartin, I. and**  
165 **Martin, S. G.** (2020). A toolbox of stable integration vectors in the fission yeast  
166 *Schizosaccharomyces pombe*. *J. Cell Sci.* **133**,.
- 167 **Wood, V., Gwilliam, R., Rajandream, M.-A., Lyne, M., Lyne, R., Stewart, A., Sgouros, J., Peat,**  
168 **N., Hayles, J., Baker, S., et al.** (2002). The genome sequence of *Schizosaccharomyces pombe*.  
169 *Nature* **415**, 871–880.
- 170
